# Supplementary material
Source: PubMed Central journal article supplement (PMC2896962)

# Supporting Information

## Computation-Guided Development of Au-Catalyzed Cycloisomerizations Proceeding via 1,2-Si- or 1,2-H Migrations: Regiodivergent Synthesis of Silylfurans

Alexander S. Dudnik,<sup>§</sup> Yuanzhi Xia,<sup>†‡</sup> Yahong Li,<sup>\*†‡</sup> and Vladimir Gevorgyan<sup>\*§</sup>

*Department of Chemistry, University of Illinois at Chicago, Chicago, Illinois 60607-7061, Key Laboratory of Organic Synthesis of Jiangsu Province, Department of Chemistry and Chemical Engineering, Suzhou University, Suzhou 215006, China, and Qinghai Institute of Salt Lakes, Chinese Academy of Sciences, Xining 810008, China.*

E-mail: liyahong@suda.edu.cn; vlad@uic.edu

### Content

|                                     |     |
|-------------------------------------|-----|
| General Information                 | S2  |
| Synthesis of Starting Materials     | S2  |
| Optimization of Reaction Conditions | S5  |
| Synthesis of Furans                 | S5  |
| Computational Section               | S11 |
| Spectral Charts                     | S47 |

## General Information

NMR spectra were recorded on Bruker Avance DRX-500 (500 MHz) and DPX-400 (400 MHz) instruments. GC/MS analyses were performed on a Hewlett Packard Model 6890 GC interfaced to a Hewlett Packard Model 5973 mass selective detector (15 m × 0.25 mm capillary column, HP-5MS). Column chromatography was carried out employing Merck silica gel (Kieselgel 60, 63-200 μm), ICN silica gel (ICN SiliTech, 63-200 μm), and SiliCycle silica gel (40-63 μm). Analytical thin-layer chromatography (TLC) was performed on 0.2 mm precoated Silica gel plates (60 F<sub>254</sub>).

All manipulations with transition metal catalysts were conducted under inert atmosphere using a combination of glovebox and standard Schlenk techniques. Anhydrous toluene, tetrahydrofuran, ether, 1,2-dichloroethane and dichloromethane purchased from Aldrich were additionally purified on PureSolv PS-400-4 by Innovative Technology, Inc. purification system and stored over calcium hydride. All other reagents were purchased from various commercial sources and used without additional purification. Silyl ketenes and phosphoranes were synthesized via known literature procedures.

## Synthesis of Starting Materials

### Procedure A:

Allenyl- (**4**) or homopropargyl (**6**) ketones were synthesized via Wittig olefination of the corresponding silyl ketenes with stabilized phosphoranes. Accordingly, to a stirred 0.1 M solution of silyl ketene in anhydrous DCM, DCM-Hexanes, or DCE was added in one portion phosphorane (1.1 eq). The mixture was stirred at -40 °C – +75 °C and monitored by GC and TLC for complete consumption of the silyl ketene. Hexanes were then added and the solution was filtered through silica gel. The filtrate was concentrated under reduced pressure and the residual oil purified by flash column chromatography.

### Procedure B:

Trimethylsilyl propargyl bromide (2 eq) was added to a mixture of the indium powder (2 eq) and indium tribromide (0.1 eq) in anhydrous THF (1 M) at room temperature with stirring under an atmosphere of dry argon. After 15 min, aryl aldehyde (1 eq) was added at room temperature. The mixture was refluxed overnight, and finally quenched with 1 M HCl solution. The aqueous layer was extracted with ethyl acetate. The combined organic extracts were washed with brine, dried over anhydrous magnesium sulfate, concentrated under vacuum, and filtered through flash silica gel to provide crude homopropargyl alcohol which was further oxidized with DMP. Accordingly, Dess-Martin periodinane (15 wt% solution in DCM, 2.6 mL, 1.2 equiv.) was added to the solution of propargyl alcohol in anhydrous DCM (0.3 M) and the mixture was stirred at room temperature for 1 h

(monitored by TLC). Hexanes were then added and the solution was filtered through silica gel. The filtrate was concentrated under reduced pressure and the residual oil purified by flash column chromatography.

### Procedure C:

To a stirred 0.125 M solution of silyl acetylene (1 eq) at  $-78\text{ }^{\circ}\text{C}$  was added dropwise *n*-BuLi (1.1 eq). After stirring for 30 min,  $\text{BF}_3\text{-Et}_2\text{O}$  (1.5 eq) was added followed by epoxide (1.3 eq), and the mixture was stirred for 1 h at  $-78\text{ }^{\circ}\text{C}$ . The reaction mixture was quenched with aqueous  $\text{NH}_4\text{Cl}$  and extracted with ethyl acetate. The combined organic phases were washed with brine, dried over  $\text{Na}_2\text{SO}_4$ , and concentrated. The residue was purified by column chromatography (5-10% EtOAc in hexane) to give homopropargyl alcohol which was further oxidized with DMP. Accordingly, Dess-Martin periodinane (15 wt% solution in DCM, 2.6 mL, 1.2 equiv.) was added to the solution of propargyl alcohol in anhydrous DCM (0.3 M) and the mixture was stirred at room temperature for 1 h (monitored by TLC). Hexanes were then added and the solution was filtered through silica gel. The filtrate was concentrated under reduced pressure and the residual oil purified by flash column chromatography.

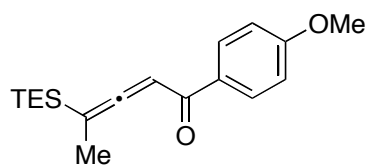

**4a:** (A, DCE,  $40\text{ }^{\circ}\text{C}$ , 3 days, 71%):  $^1\text{H}$  NMR (500 MHz,  $\text{CDCl}_3$ )  $\delta$  ppm 7.81 - 7.89 (m, 2 H), 6.83 - 6.97 (m, 2 H), 6.02 (q,  $J=2.81$  Hz, 1 H), 3.85 (s, 3 H), 1.86 (d,  $J=2.81$  Hz, 3 H), 0.87 (t,  $J=7.89$  Hz, 9 H), 0.61 (td,  $J=7.89, 1.60$  Hz, 6 H);  $^{13}\text{C}$  NMR (126 MHz,  $\text{CDCl}_3$ )  $\delta$  ppm 210.3, 192.0, 162.8, 131.3, 130.5, 113.3, 91.4, 87.7, 55.4, 14.6, 7.0, 2.8

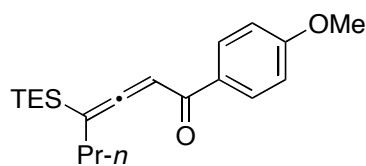

**4b:** (A, DCE,  $75\text{ }^{\circ}\text{C}$ , 3 days, 30%):  $^1\text{H}$  NMR (500 MHz,  $\text{CDCl}_3$ )  $\delta$  ppm 7.85 - 7.92 (m, 2 H), 6.83 - 6.93 (m, 2 H), 6.17 (t,  $J=3.12$  Hz, 1 H), 3.85 (s, 3 H), 1.98 - 2.20 (m, 2 H), 1.52 - 1.64 (m, 2 H), 0.96 (t,  $J=7.34$  Hz, 3 H), 0.91 (t,  $J=7.89$  Hz, 9 H), 0.59 - 0.68 (m, 6 H);  $^{13}\text{C}$  NMR (126 MHz,  $\text{CDCl}_3$ )  $\delta$  ppm 209.6, 191.1, 162.8, 131.5, 130.4, 113.4, 96.7, 88.7, 55.4, 31.1, 22.5, 14.0, 7.1, 3.1

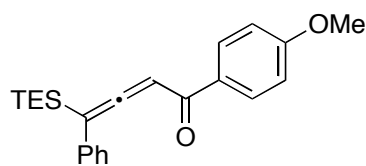

**4c:** (A, DCE, rt, 4 days, 74%):  $^1\text{H}$  NMR (500 MHz,  $\text{CDCl}_3$ )  $\delta$  ppm 7.82 - 7.88 (m, 2 H), 7.23 - 7.39 (m, 5 H), 6.82 - 6.89 (m, 2 H), 6.36 (s, 1 H), 3.84 (s, 3 H), 0.89 (t,  $J=7.82$  Hz, 9 H), 0.70 - 0.77 (m, 6 H);  $^{13}\text{C}$  NMR (126 MHz,  $\text{CDCl}_3$ )  $\delta$  ppm 213.3, 190.8, 163.1, 135.0, 131.0, 130.7, 128.8, 127.9, 127.1, 113.4, 100.8, 89.3, 55.4, 7.1, 3.7

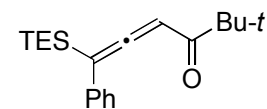

**4d:** (A, DCE, rt, 24 h, 79%):  $^1\text{H}$  NMR (500 MHz,  $\text{CDCl}_3$ )  $\delta$  ppm 7.25 - 7.34 (m, 4 H), 7.19 - 7.25 (m, 1 H), 6.14 (s, 1 H), 1.20 (s, 9 H), 0.93 - 1.00 (m, 9 H), 0.71 - 0.79 (m, 6 H);  $^{13}\text{C}$  NMR (126 MHz,  $\text{CDCl}_3$ )  $\delta$  ppm 212.1, 204.9, 135.1, 128.7, 128.0, 126.9, 100.8, 86.5, 44.0, 26.6, 7.2, 3.8

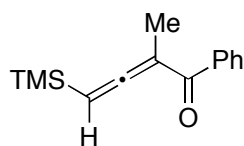

**4e:** (A, DCM, -40 °C - rt, 10 h, 99%):  $^1\text{H}$  NMR (500 MHz,  $\text{CDCl}_3$ )  $\delta$  ppm 7.63 - 7.68 (m, 2 H), 7.42 - 7.46 (m, 1 H), 7.31 - 7.37 (m, 2 H), 5.24 (q,  $J=3.30$  Hz, 1 H), 1.95 (d,  $J=3.30$  Hz, 3 H), 0.02 (s, 9 H);  $^{13}\text{C}$  NMR (126 MHz,  $\text{CDCl}_3$ )  $\delta$  ppm 217.0, 196.5, 139.2, 131.1, 128.4, 127.5, 97.2, 86.0, 13.9, -1.1

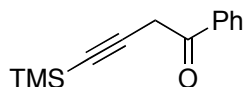

**6f:** (A, DCM, -40 °C - rt, 10 h, 60%):  $^1\text{H}$  NMR (500 MHz,  $\text{CDCl}_3$ )  $\delta$  ppm 7.97 - 8.03 (m, 2 H), 7.57 (dt,  $J=7.47$ , 1.49 Hz, 1 H), 7.44 - 7.49 (m, 2 H), 3.88 (s, 2 H), 0.15 (s, 9 H);  $^{13}\text{C}$  NMR (126 MHz,  $\text{CDCl}_3$ )  $\delta$  ppm 192.9, 135.4, 133.5, 128.7, 128.6, 98.4, 90.4, 32.0, -0.15

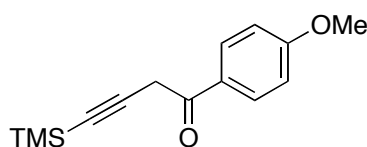

**6g:** (A, DCM, rt, 10 h, 72%):  $^1\text{H}$  NMR (500 MHz,  $\text{CDCl}_3$ )  $\delta$  ppm 7.95 - 8.02 (m, 2 H), 6.90 - 6.98 (m, 2 H), 3.87 (s, 3 H), 3.83 (s, 2 H), 0.15 (s, 9 H);  $^{13}\text{C}$  NMR (126 MHz,  $\text{CDCl}_3$ )  $\delta$  ppm 191.4, 163.8, 131.1, 128.5, 113.7, 98.9, 90.1, 55.5, 31.8, -0.1

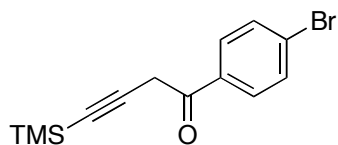

**6h:** (A, DCE, rt, 24 h, 35%):  $^1\text{H}$  NMR (500 MHz,  $\text{CDCl}_3$ )  $\delta$  ppm 7.84 - 7.92 (m, 2 H), 7.58 - 7.65 (m, 2 H), 3.84 (s, 2 H), 0.15 (s, 9 H);  $^{13}\text{C}$  NMR (126 MHz,  $\text{CDCl}_3$ )  $\delta$  ppm 191.9, 134.1, 131.9, 130.3, 128.8, 97.9, 90.9, 32.1, -0.2

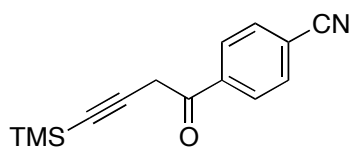

**6i:** (B, 12%):  $^1\text{H}$  NMR (500 MHz,  $\text{CDCl}_3$ )  $\delta$  ppm 8.04 - 8.21 (m, 2 H), 7.72 - 7.83 (m, 2 H), 3.87 (s, 2 H), 0.13 (s, 9 H);  $^{13}\text{C}$  NMR (126 MHz,  $\text{CDCl}_3$ )  $\delta$  ppm 191.7, 138.2, 132.4, 129.2, 117.8, 116.8, 97.2, 91.6, 32.4, -0.2

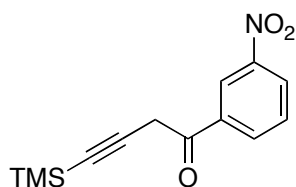

**6j:** (B, 43%):  $^1\text{H}$  NMR (500 MHz,  $\text{CDCl}_3$ )  $\delta$  ppm 8.88 - 8.92 (m, 1 H), 8.45 (ddd,  $J=8.21$ , 2.34, 1.01 Hz, 1 H), 8.34 - 8.37 (m, 1 H), 7.66 - 7.74 (m, 1 H), 3.91 (s, 2 H), 0.13 (s, 9 H);  $^{13}\text{C}$  NMR (126 MHz,  $\text{CDCl}_3$ )  $\delta$  ppm 190.9, 148.4, 136.5, 134.3, 129.9, 127.8, 123.8, 97.2, 91.9, 32.5, -0.3

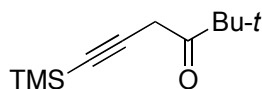

**6k:** (A, DCM-Hexanes, -40 °C - rt, 6 h, 48%):  $^1\text{H}$  NMR (500 MHz,  $\text{CDCl}_3$ )  $\delta$  ppm 3.46 (s, 2 H), 1.18 (s, 9 H), 0.16 (s, 9 H);  $^{13}\text{C}$  NMR (126 MHz,  $\text{CDCl}_3$ )  $\delta$  ppm 208.3, 98.7, 89.2, 44.6, 30.0, 26.6, -0.1

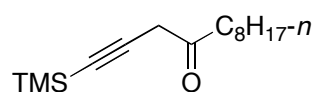

**6l:** (C, 67%):  $^1\text{H}$  NMR (500 MHz,  $\text{CDCl}_3$ )  $\delta$  ppm 3.26 (s, 2 H), 2.61 (t,  $J=7.34$  Hz, 2 H), 1.52 - 1.67 (m, 2 H), 1.26 (s, 10 H), 0.87 (s, 3 H), 0.17 (s, 9 H);  $^{13}\text{C}$  NMR (126 MHz,  $\text{CDCl}_3$ )  $\delta$  ppm 204.5, 98.7, 89.5, 41.2, 35.3, 31.8, 29.3, 29.1, 23.7, 22.6, 14.1, -0.1

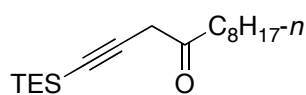

**6m:** (C, 70%):  $^1\text{H}$  NMR (500 MHz,  $\text{CDCl}_3$ )  $\delta$  ppm 3.27 (s, 2 H), 2.64 (t,  $J=7.43$  Hz, 2 H), 1.55 - 1.63 (m, 2 H), 1.18 - 1.33 (m, 10 H), 0.99 (t,  $J=7.98$  Hz, 9 H), 0.83 - 0.90 (m, 3 H), 0.60 (q,  $J=7.89$  Hz, 6 H);  $^{13}\text{C}$  NMR (126 MHz,  $\text{CDCl}_3$ )  $\delta$  ppm 204.7, 99.8, 86.9, 41.1, 35.4, 31.8, 29.3, 29.1, 23.7, 22.6, 14.1, 7.4, 4.4

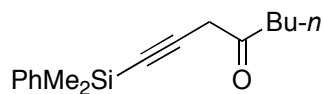

**6n:** (C, 68%):  $^1\text{H}$  NMR (500 MHz,  $\text{CDCl}_3$ )  $\delta$  ppm 7.60 - 7.67 (m, 2 H), 7.35 - 7.43 (m, 3 H), 3.33 (s, 2 H), 2.65 (t,  $J=7.43$  Hz, 2 H), 1.54 - 1.66 (m, 2 H), 1.26 - 1.39 (m, 2 H), 0.91 (t,  $J=7.34$  Hz, 3 H), 0.43 (s, 6 H);  $^{13}\text{C}$  NMR (126 MHz,  $\text{CDCl}_3$ )  $\delta$  ppm 204.3, 136.8, 133.6, 129.5, 127.9, 100.6, 87.7, 41.1, 35.4, 25.7, 22.2, 13.8, -0.9

## Optimization of Reaction Conditions

To a foiled 1–5 ml Wheaton V-vial charged with catalyst and appropriate amount of rigorously dried solvent was added homopropargyl- (**6**) or allenyl- (**4**) ketone (0.1 – 0.5 mmol) under  $\text{N}_2$  or argon atmosphere and the reaction mixture was stirred at room temperature until judged complete by TLC and GC/MS analysis. The reaction mixture was filtered through a layer of flash Silica, the solvents were removed in vacuo, and the residue was analyzed by  $^1\text{H}$  NMR.

## Synthesis of Furans

To a foiled 3–10 ml Wheaton V-vial charged with 5 mol % of  $\text{AuCl}_3$  and the 1 ml of anhydrous toluene (0.5 M) in case of **4** or 5 mol % of 1:1 mixture of  $\text{Au}(\text{PPh}_3)\text{Cl}$  and  $\text{AgSbF}_6$  and the 10 ml of anhydrous 1,2-dichloroethane (0.05 M) in the case of **6** and stirred for 5 min was then added dry allenyl- (**4**, **Table S1**) or homopropargyl (**6**, **Table S2**) ketone (0.5 mmol), respectively, under argon atmosphere and the reaction mixture was stirred at room temperature until judged complete. The reaction mixture was then filtered through a layer of flash Silica, the solvents were removed in vacuo, and the residue was purified by column chromatography (Hexanes; Hexanes- $\text{Et}_2\text{O}$  (20:1 – 10:1); Pentane; Pentane- $\text{Et}_2\text{O}$  (20:1 – 10:1)).

**Table S1: Synthesis of Furans from Allenyl Ketones 4**

| Entry | Substrate                                                                          | Product                                                                             | Time, h | Yield, % <sup>a</sup>               |
|-------|------------------------------------------------------------------------------------|-------------------------------------------------------------------------------------|---------|-------------------------------------|
| 1     | 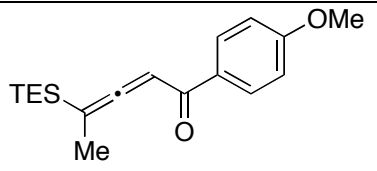  |   | 1       | <b>2a</b> , 90                      |
| 2     |   |   | 1       | <b>2b</b> , 80                      |
| 3     |   |   | 1       | <b>2c</b> , 82                      |
| 4     |   |   | 1       | <b>2d</b> , 87                      |
| 5     |  |  | 1.5     | <b>2e</b> , 82<br>(77) <sup>b</sup> |

<sup>a</sup> Isolated yield of product for reactions performed on 0.5 mmol scale. <sup>b</sup> Isolated yield of **2e** for reaction performed with 1 mol % of catalyst.

**Table S2: Synthesis of Furans from Homopropargyl Ketones 6**

| Entry | Substrate                                                                           | Product                                                                             | Time, h | 2:3  | Yield, % <sup>a,b</sup>     |
|-------|-------------------------------------------------------------------------------------|-------------------------------------------------------------------------------------|---------|------|-----------------------------|
| 1     | 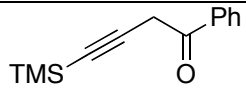   |    | 1       | 1:0  | <b>2f</b> , 79              |
| 2     |    |    | 5       | 1:0  | <b>2g</b> , 91              |
| 3     |    |    | 24      | 14:1 | <b>2h</b> , 91              |
| 4     |    |    | 30      | 10:1 | <b>2i</b> , 48              |
| 5     |   |   | 30      | 8:1  | <b>2j</b> , 65              |
| 6     |  |  | 10      | 1:0  | <b>2k</b> , 71 <sup>c</sup> |
| 7     |  |  | 15      | 1:0  | <b>2l</b> , 68              |
| 8     |  |  | 20      | 1:0  | <b>2m</b> , 77              |
| 9     |  |  | 30      | 1:0  | <b>2n</b> , 67              |

<sup>a</sup> Isolated yield of product for reactions performed on 0.5 mmol scale. <sup>b</sup> **2f** and **2l** contained 8 and 6% of the corresponding desilylated furan, respectively. <sup>c</sup> GC Yield, **2k** is a volatile compound.

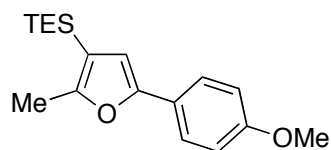

**2a:**  $^1\text{H}$  NMR (500 MHz,  $\text{CDCl}_3$ )  $\delta$  ppm 7.55 - 7.59 (m, 2 H), 6.88 - 6.92 (m, 2 H), 6.39 (s, 1 H), 3.83 (s, 3 H), 2.40 (s, 3 H), 0.99 (t,  $J=7.89$  Hz, 9 H), 0.73 - 0.80 (m, 6 H);  $^{13}\text{C}$  NMR (126 MHz,  $\text{CDCl}_3$ )  $\delta$  ppm 158.5, 156.3, 152.1, 124.8, 124.3, 114.0, 111.4, 109.3, 55.3, 14.7, 7.4, 4.0;

HRMS (EI) calcd. for  $\text{C}_{18}\text{H}_{26}\text{O}_2\text{Si}$  [ $\text{M}^+$ ]: 302.17021. Found: 302.17030.

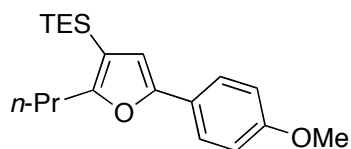

**2b:**  $^1\text{H}$  NMR (500 MHz,  $\text{CDCl}_3$ )  $\delta$  ppm 7.52 - 7.62 (m, 2 H), 6.85 - 6.95 (m, 2 H), 6.38 (s, 1 H), 3.83 (s, 3 H), 2.60 - 2.71 (m, 2 H), 1.70 - 1.79 (m, 2 H), 0.94 - 1.03 (m, 12 H), 0.76 (q,  $J=7.89$  Hz, 6 H);  $^{13}\text{C}$  NMR (126 MHz,  $\text{CDCl}_3$ )  $\delta$  ppm 160.6, 158.5, 152.1, 124.8, 124.4, 114.0, 111.2,

109.0, 55.3, 31.2, 22.7, 14.0, 7.4, 4.1; HRMS (EI) calcd. for  $\text{C}_{20}\text{H}_{30}\text{O}_2\text{Si}$  [ $\text{M}^+$ ]: 330.20151. Found: 330.20229.

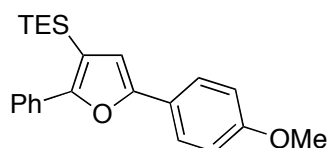

**2c:**  $^1\text{H}$  NMR (500 MHz,  $\text{CDCl}_3$ )  $\delta$  ppm 7.64 - 7.71 (m, 4 H), 7.39 - 7.46 (m, 2 H), 7.31 - 7.38 (m, 1 H), 6.90 - 6.99 (m, 2 H), 6.61 (s, 1 H), 3.85 (s, 3 H), 0.95 (t,  $J=7.84$  Hz, 9 H), 0.78 - 0.84 (m, 6 H);  $^{13}\text{C}$  NMR (126 MHz,  $\text{CDCl}_3$ )  $\delta$  ppm 159.0, 157.9, 153.2, 133.0, 128.1, 127.7, 127.3, 125.3,

123.9, 114.2, 113.6, 111.4, 55.3, 7.5, 4.2; HRMS (EI) calcd. for  $\text{C}_{23}\text{H}_{28}\text{O}_2\text{Si}$  [ $\text{M}^+$ ]: 364.18586. Found: 364.18584.

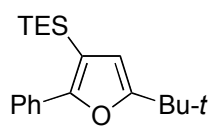

**2d:**  $^1\text{H}$  NMR (500 MHz,  $\text{CDCl}_3$ )  $\delta$  ppm 7.53 - 7.63 (m, 2 H), 7.35 - 7.43 (m, 2 H), 7.27 - 7.33 (m, 1 H), 5.99 (s, 1 H), 1.34 (s, 9 H), 0.89 - 0.98 (m, 9 H), 0.73 - 0.80 (m, 6 H);  $^{13}\text{C}$  NMR (126 MHz,  $\text{CDCl}_3$ )  $\delta$  ppm 163.3, 156.9, 133.5, 128.0, 127.3, 127.1,

111.6, 109.4, 32.6, 29.2, 7.6, 4.3; HRMS (EI) calcd. for  $\text{C}_{20}\text{H}_{30}\text{OSi}$  [ $\text{M}^+$ ]: 314.20659. Found: 314.20694.

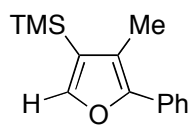

**2e:**  $^1\text{H}$  NMR (500 MHz,  $\text{CDCl}_3$ )  $\delta$  ppm 7.61 - 7.64 (m, 2 H), 7.40 - 7.45 (m, 2 H), 7.30 (s, 1 H), 7.27 - 7.30 (m, 1 H), 2.33 (s, 3 H), 0.31 (s, 9 H);  $^{13}\text{C}$  NMR (126 MHz,  $\text{CDCl}_3$ )  $\delta$  ppm 149.9, 146.3, 131.8, 128.4, 126.7, 125.9, 122.4, 119.8, 12.3, -0.6;

HRMS (EI) calcd. for  $\text{C}_{14}\text{H}_{18}\text{OSi}$  [ $\text{M}^+$ ]: 230.11269. Found: 230.11235.

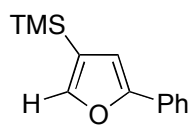

**2f:** (contained ca. 8% of the desilylated furan)  $^1\text{H}$  NMR (500 MHz,  $\text{CDCl}_3$ )  $\delta$  ppm 7.65 - 7.73 (m, 2 H), 7.34 - 7.43 (m, 3 H), 7.22 - 7.30 (m, 1 H), 6.66 (d,  $J=0.92$  Hz, 1 H), 0.27 (s, 9 H);  $^{13}\text{C}$  NMR (126 MHz,  $\text{CDCl}_3$ )  $\delta$  ppm 154.7, 146.6, 130.9, 128.6,

127.2, 123.9, 121.0, 108.7, -0.7; HRMS (EI) calcd. for  $\text{C}_{13}\text{H}_{16}\text{OSi}$  [ $\text{M}^+$ ]: 216.09704. Found: 216.09793.

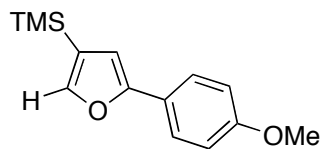

**2g:**  $^1\text{H}$  NMR (500 MHz,  $\text{CDCl}_3$ )  $\delta$  ppm 7.61 (s, 2 H), 7.33 (d,  $J=0.73$  Hz, 1 H), 6.92 (s, 2 H), 6.51 (d,  $J=0.92$  Hz, 1 H), 3.84 (s, 3 H), 0.26 (s, 9 H);  $^{13}\text{C}$  NMR (126 MHz,  $\text{CDCl}_3$ )  $\delta$  ppm 158.9, 154.7, 145.9, 125.3, 124.0, 120.9,

114.1, 107.0, 55.3, -0.7; HRMS (EI) calcd. for  $\text{C}_{14}\text{H}_{18}\text{O}_2\text{Si}$  [ $\text{M}^+$ ]: 246.10761. Found: 246.10680.



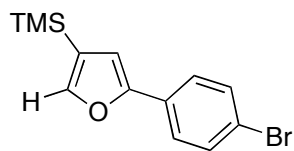

**2h:** (14 : 1 mixture with **3h**)  $^1\text{H}$  NMR (500 MHz,  $\text{CDCl}_3$ )  $\delta$  ppm 7.45 - 7.61 (m, 4 H), 7.36 (d,  $J=0.73$  Hz, 1 H), 6.64 (d,  $J=0.73$  Hz, 1 H), 0.25 (s, 9 H);  $^{13}\text{C}$  NMR (126 MHz,  $\text{CDCl}_3$ )  $\delta$  ppm 153.6, 146.9, 131.8, 129.8, 125.4, 121.3, 120.9, 109.3, -0.7; HRMS (EI) calcd. for  $\text{C}_{13}\text{H}_{15}\text{BrOSi}$  [ $\text{M}^+$ ]: 294.00755. Found: 294.00712.

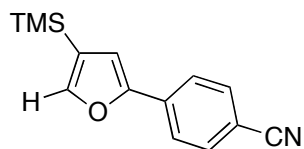

**2i:** (10 : 1 mixture with **3i**)  $^1\text{H}$  NMR (500 MHz,  $\text{CDCl}_3$ )  $\delta$  ppm 7.74 (s, 2 H), 7.61 - 7.68 (m, 2 H), 7.42 (d,  $J=0.73$  Hz, 1 H), 6.80 (d,  $J=0.73$  Hz, 1 H), 0.26 (s, 9 H);  $^{13}\text{C}$  NMR (126 MHz,  $\text{CDCl}_3$ )  $\delta$  ppm 152.7, 148.1, 134.6, 132.6, 124.0, 121.9, 119.0, 112.0, 110.1, -0.8; HRMS (EI) calcd. for  $\text{C}_{14}\text{H}_{15}\text{NOSi}$  [ $\text{M}^+$ ]: 241.09229. Found: 241.09316.

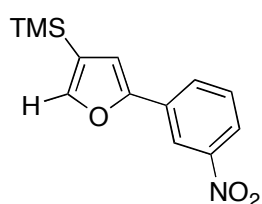

**2j:** (8 : 1 mixture with **3j**)  $^1\text{H}$  NMR (500 MHz,  $\text{CDCl}_3$ )  $\delta$  ppm 8.49 (t,  $J=1.93$  Hz, 1 H), 8.08 (ddd,  $J=8.21, 2.25, 0.92$  Hz, 1 H), 7.96 (ddd,  $J=7.84, 1.60, 1.01$  Hz, 1 H), 7.54 (t,  $J=8.07$  Hz, 1 H), 7.42 (d,  $J=0.73$  Hz, 1 H), 6.80 (d,  $J=0.73$  Hz, 1 H), 0.27 (s, 9 H);  $^{13}\text{C}$  NMR (126 MHz,  $\text{CDCl}_3$ )  $\delta$  ppm 152.2, 148.7, 147.7, 132.4, 129.7, 129.3, 121.7, 121.6, 118.6, 111.1, -0.8; HRMS (EI) calcd. for  $\text{C}_{13}\text{H}_{15}\text{NO}_3\text{Si}$  [ $\text{M}^+$ ]: 261.08212. Found: 261.08224.

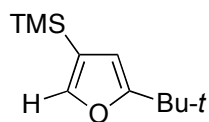

**2k:**  $^1\text{H}$  NMR (500 MHz,  $\text{CDCl}_3$ )  $\delta$  ppm 7.20 (d,  $J=0.92$  Hz, 1 H), 5.92 (d,  $J=0.92$  Hz, 1 H), 1.29 (s, 9 H), 0.20 (s, 9 H);  $^{13}\text{C}$  NMR (126 MHz,  $\text{CDCl}_3$ )  $\delta$  ppm 164.8, 145.2, 118.8, 105.2, 32.5, 29.1, -0.6; HRMS (EI) calcd. for  $\text{C}_{11}\text{H}_{20}\text{OSi}$  [ $\text{M}^+$ ]: 196.12834. Found: 196.12911.

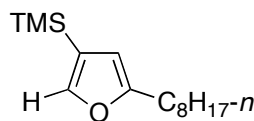

**2l:** (contained ca. 6% of the desilylated furan)  $^1\text{H}$  NMR (500 MHz,  $\text{CDCl}_3$ )  $\delta$  ppm 7.20 (d,  $J=0.92$  Hz, 1 H), 5.92 - 5.98 (m, 1 H), 2.57 - 2.65 (m, 2 H), 1.59 - 1.71 (m, 2 H), 1.22 - 1.40 (m, 10 H), 0.89 (t,  $J=6.90$  Hz, 3 H), 0.20 (s, 9 H);  $^{13}\text{C}$  NMR (126 MHz,  $\text{CDCl}_3$ )  $\delta$  ppm 157.2, 145.3, 119.3, 108.0, 31.9, 29.3, 29.3, 29.2, 28.1, 27.9, 22.7, 14.1, -0.7; HRMS (EI) calcd. for  $\text{C}_{15}\text{H}_{28}\text{OSi}$  [ $\text{M}^+$ ]: 252.19094. Found: 252.19014.

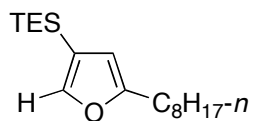

**2m:**  $^1\text{H}$  NMR (500 MHz,  $\text{CDCl}_3$ )  $\delta$  ppm 7.20 (d,  $J=0.92$  Hz, 1 H), 5.83 - 6.01 (m, 1 H), 2.61 (t,  $J=7.34$  Hz, 2 H), 1.59 - 1.68 (m, 2 H), 1.22 - 1.38 (m, 10 H), 0.97 (t,  $J=7.89$  Hz, 9 H), 0.85 - 0.91 (m, 3 H), 0.69 (q,  $J=8.13$  Hz, 6 H);  $^{13}\text{C}$  NMR (126 MHz,  $\text{CDCl}_3$ )  $\delta$  ppm 156.9, 145.8, 115.6, 108.5, 31.9, 29.3, 29.3, 29.2, 28.0, 27.9, 22.7, 14.1, 7.4, 3.9; HRMS (EI) calcd. for  $\text{C}_{18}\text{H}_{34}\text{OSi}$  [ $\text{M}^+$ ]: 294.23789. Found: 294.23822.

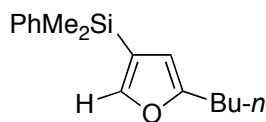

**2n:**  $^1\text{H}$  NMR (500 MHz,  $\text{CDCl}_3$ )  $\delta$  ppm 7.53 - 7.60 (m, 2 H), 7.33 - 7.42 (m, 3 H), 7.24 (d,  $J=0.92$  Hz, 1 H), 6.00 (dt,  $J=0.92, 0.73$  Hz, 1 H), 2.64 (dt,  $J=7.68, 0.73$  Hz, 2 H), 1.59 - 1.69 (m, 2 H), 1.32 - 1.44 (m, 2 H), 0.95 (t,  $J=7.43$  Hz, 3 H)

---

H), 0.48 (s, 6 H);  $^{13}\text{C}$  NMR (126 MHz,  $\text{CDCl}_3$ )  $\delta$  ppm 157.4, 146.4, 138.6, 133.9, 129.1, 127.8, 117.3, 108.4, 30.2, 27.6, 22.4, 13.9, -1.9; HRMS (EI) calcd. for  $\text{C}_{16}\text{H}_{22}\text{OSi}$   $[\text{M}^+]$ : 258.14399. Found: 258.14410.

## Computational Section

### 1. Computation Details

All DFT calculations were performed with the Gaussian 03 program package.<sup>1</sup> The geometry optimizations of all minima and transition states along the potential energy surface were performed at the B3LYP levels of theory.<sup>2</sup> This method was proven to be appropriate for the investigation of gold-based systems,<sup>3</sup> and has been successfully applied to the mechanistic studies of various catalytic reactions.<sup>4</sup> The 6-31G\* basis set was used for C, H, O, P, Si, S, F, and Cl atoms,<sup>5</sup> while LANL2DZ basis set<sup>6</sup> was used for Au. The vibrational frequencies were computed at the same level of theory as

---

<sup>1</sup> Gaussian 03, Revision C.02, Frisch, M. J.; Trucks, G. W.; Schlegel, H. B.; Scuseria, G. E.; Robb, M. A.; Cheeseman, J. R.; Montgomery, Jr., J. A.; Vreven, T.; Kudin, K. N.; Burant, J. C.; Millam, J. M.; Iyengar, S. S.; Tomasi, J.; Barone, V.; Mennucci, B.; Cossi, M.; Scalmani, G.; Rega, N.; Petersson, G. A.; Nakatsuji, H.; Hada, M.; Ehara, M.; Toyota, K.; Fukuda, R.; Hasegawa, J.; Ishida, M.; Nakajima, T.; Honda, Y.; Kitao, O.; Nakai, H.; Klene, M.; Li, X.; Knox, J. E.; Hratchian, H. P.; Cross, J. B.; Bakken, V.; Adamo, C.; Jaramillo, J.; Gomperts, R.; Stratmann, R. E.; Yazyev, O.; Austin, A. J.; Cammi, R.; Pomelli, C.; Ochterski, J. W.; Ayala, P. Y.; Morokuma, K.; Voth, G. A.; Salvador, P.; Dannenberg, J. J.; Zakrzewski, V. G.; Dapprich, S.; Daniels, A. D.; Strain, M. C.; Farkas, O.; Malick, D. K.; Rabuck, A. D.; Raghavachari, K.; Foresman, J. B.; Ortiz, J. V.; Cui, Q.; Baboul, A. G.; Clifford, S.; Cioslowski, J.; Stefanov, B. B.; Liu, G.; Liashenko, A.; Piskorz, P.; Komaromi, I.; Martin, R. L.; Fox, D. J.; Keith, T.; Al-Laham, M. A.; Peng, C. Y.; Nanayakkara, A.; Challacombe, M.; Gill, P. M. W.; Johnson, B.; Chen, W.; Wong, M. W.; Gonzalez, C.; and Pople, J. A.; Gaussian, Inc., Wallingford CT, 2004.

<sup>2</sup> (a) Becke, A. D. *J. Chem. Phys.* **1993**, *98*, 5648. (b) Becke, A. D. *J. Chem. Phys.* **1993**, *98*, 1372. (c) Lee, C.; Yang, W.; Parr, R. G. *Phys. Rev. B* **1988**, *37*, 785.

<sup>3</sup> For review, see: Pyykkö, P. *Angew. Chem., Int. Ed.* **2004**, *43*, 4412.

<sup>4</sup> (a) Nevado, C.; Echavarren, A. M. *Chem. Eur. J.* **2005**, *11*, 3155. (b) Comas-Vives, A.; González-Arellano, C.; Corma, A.; Iglesias, M.; Sánchez, F.; Ujaque, G. *J. Am. Chem. Soc.* **2006**, *128*, 4756. (c) Nieto-Oberhuber, C.; López, S.; Muñoz, M. P.; Cárdenas, D. J.; Buñuel, E.; Nevado, C.; Echavarren, A. M. *Angew. Chem., Int. Ed.* **2005**, *44*, 6146. (d) Faza, O. N.; López, C. S.; Álvarez, R.; de Lera, A. R. *J. Am. Chem. Soc.* **2006**, *128*, 2434. (e) Straub, B. F. *Chem. Commun.* **2004**, 1726. (f) Correa, A.; Marion, N.; Fensterbank, L.; Malacria, M.; Nolan, S. P.; Cavallo, L. *Angew. Chem., Int. Ed.* **2008**, *47*, 718. (g) Nieto-Oberhuber, C.; Muñoz, M. P.; Buñuel, E.; Nevado, C.; Cárdenas, D. J.; Echavarren, A. M. *Angew. Chem., Int. Ed.* **2004**, *43*, 2402. (h) Shi, F.-Q.; Li, X.; Xia, Y.; Zhang, L.; Yu, Z.-X. *J. Am. Chem. Soc.* **2007**, *129*, 15503. (i) Lemièrre, G.; Gandon, V.; Cariou, K.; Hours, A.; Fukuyama, T.; Dhimane, A.-L.; Fensterbank, L.; Malacria, M. *J. Am. Chem. Soc.* **2009**, *131*, 2993. (j) Nieto-Oberhuber, C.; Pérez-Galán, P.; Herrero-Gómez, E.; Lauterbach, T.; Rodríguez, C.; López, S.; Bour, C.; Rosellón, A.; Cárdenas, D. J.; Echavarren, A. M. *J. Am. Chem. Soc.* **2008**, *130*, 269.

<sup>5</sup> Hehre, W. J.; Radom, L.; Schleyer, P. v. R.; Pople, J. A. In *Ab initio Molecular Orbital Theory*; Wiley: New York, 1986.

(6) (a) Hay, P. J.; Wadt, W. R. *J. Chem. Phys.* **1985**, *82*, 270. (b) Wadt, W. R.; Hay, P. J. *J. Chem. Phys.* **1985**, *82*, 284. (c) Hay, P. J.; Wadt, W. R. *J. Chem. Phys.* **1985**, *82*, 299.

that for the geometry optimization to check whether the optimized geometrical structure is at an energy minimum or a transition state and to evaluate the zero-point vibration energy (ZPVE). Intrinsic reaction coordinate (IRC)<sup>7</sup> calculations were used to confirm that the transition states found connected the related reactants and products. Solvent effects were computed by the conductor-like polarizable continuum model (CPCM) with UAKS radii<sup>8</sup> at the B3LYP/6-31G\*(LANL2DZ) level using the gas phase optimized structures. The dielectric constant in the CPCM calculations was set to  $\epsilon = 2.379$  and 8.93 for the simulation of toluene and dichloroethane (DCE) solvent, respectively. The  $\Delta E_0$  values are the ZPVE corrected relative electronic energy in the gas phase. The  $\Delta H_{298}$  values are gas phase relative enthalpies. Solvation free energies ( $\Delta G_{\text{Tol}}$  and  $\Delta G_{\text{DCE}}$ ) in toluene and DCE were calculated by adding the solvation energies to the computed gas phase relative free energies ( $\Delta G_{298}$ ).

---

(7) (a) Gonzalez, C.; Schlegel, H. B. *J. Chem. Phys.* **1989**, *90*, 2154. (b) Gonzalez, C.; Schlegel, H. B. *J. Phys. Chem.* **1990**, *94*, 5523.

(8) (a) Barone, V.; Cossi, M.; Tomasi, J. *J. Comput. Chem.* **1998**, *19*, 404. (b) Takano, Y.; Houk, K. N. *J. Chem. Theory Comput.* **2005**, *1*, 70.

## 2. The Possibility of (H<sub>2</sub>O)<sub>3</sub>-Catalyzed Allenization in Au(PH<sub>3</sub>)OTf-Catalyzed Reactions

The relative energies in **Scheme S1** show this process requires activation energy of 17.6 kcal/mol, about 6.7 kcal/mol higher than that of the cyclization transition state **T-TS1** (**Scheme 6**).

**Scheme S1.** Potential energy surface for a possible (H<sub>2</sub>O)<sub>3</sub>-catalyzed allenization in Au(PH<sub>3</sub>)OTf-catalyzed reactions (in kcal/mol, the energies in toluene are similar)

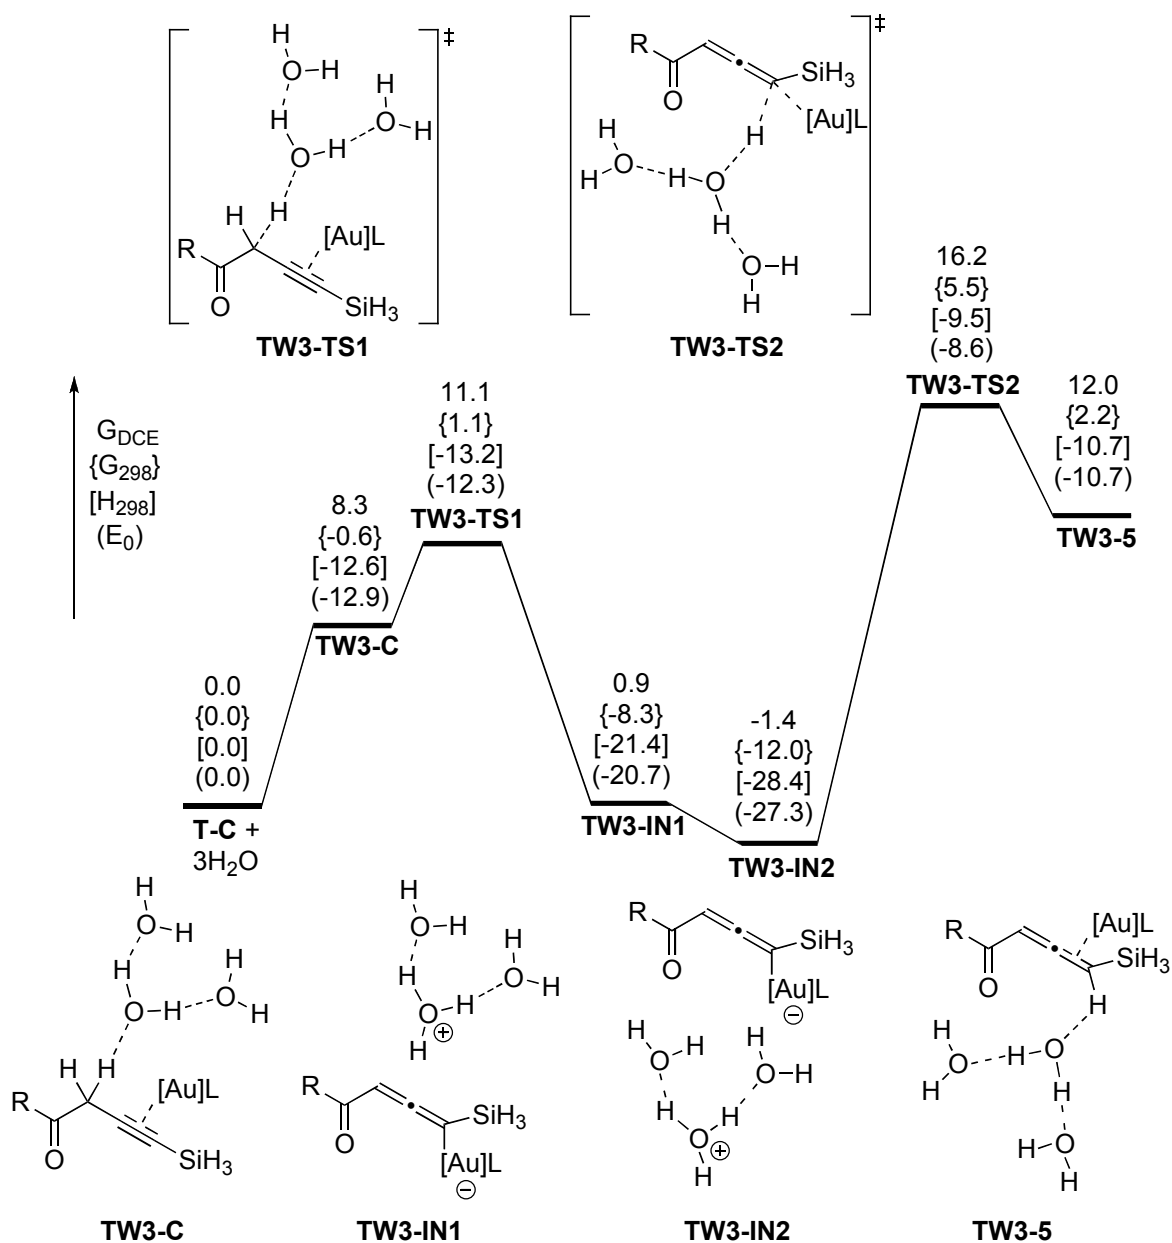

### 3. Energetics for the Generation of Products **2** and **3** from Complexes **2-AuCl<sub>3</sub>** and **3-AuCl<sub>3</sub>**, respectively (R = H)

**Scheme 2** shows that the product complexes **2-AuCl<sub>3</sub>** and **3-AuCl<sub>3</sub>** could be formed after the 1,2-Si- and 1,2-H migrations, respectively. To complete the catalytic cycle, a ligand exchange reaction as illustrated in **Scheme S2** may proceed to generate the final products and the active complex of allene and AuCl<sub>3</sub>. The free energy values indicate the generations of **2** and **3** from the reactions of allene **4** with **2-AuCl<sub>3</sub>** and **3-AuCl<sub>3</sub>** are endergonic by 17.8 and 12.2 kcal/mol, respectively.

#### **Scheme S2.** Generation of products **2** and **3** from complexes **2-AuCl<sub>3</sub>** and **3-AuCl<sub>3</sub>**

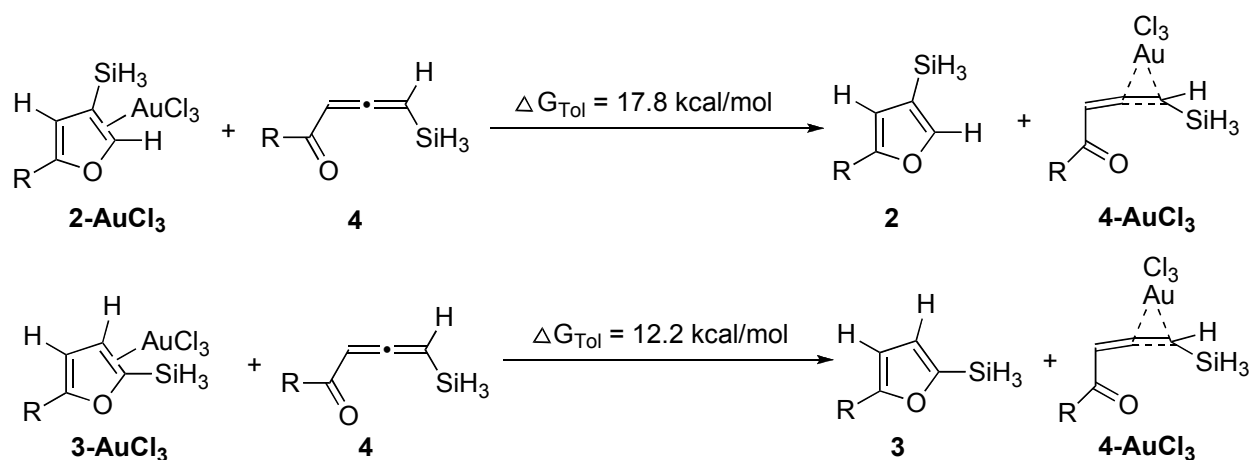

### 4. Energetics for the Dissociation of the OTf and SbF<sub>6</sub> Ligands from the Reactant Complexes

The energies in **Scheme S3** indicate that only the dissociation of OTf ligand from the reactant complex **T-C** is possible in DCE solution. In other cases, the dissociation energies are much higher.

**Scheme S3.** Energies for the formation of cationic intermediate **C-C**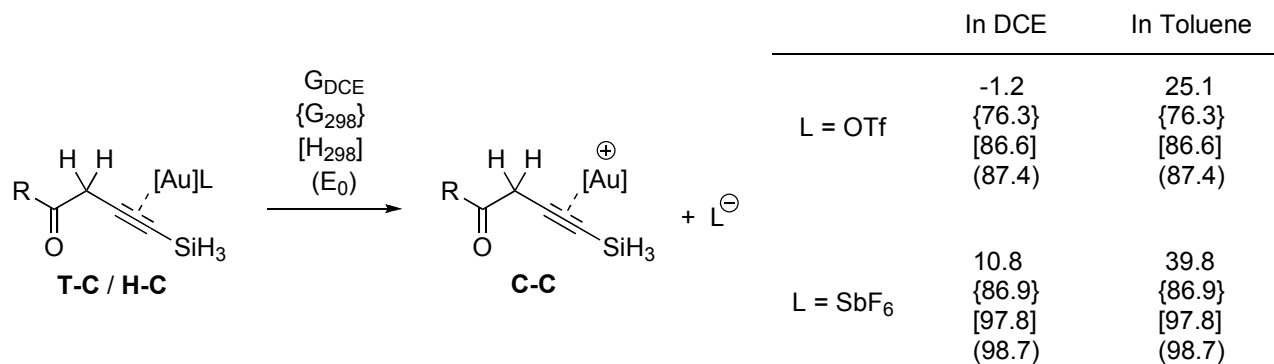**5. The Possible Reaction via Cationic Intermediate C-C**

As **Scheme S3** shows, the formation of cationic intermediate **C-C** is possible in DCE when  $L = \text{OTf}$ , in **Scheme S4** we have calculated the following reaction without the influence of any ligand. Although the cyclization (**C-TS3**) is quite easy, this process is reversible, and the following 1,2-H migration (**C-TS4**) requires an activation energy of 17.4 kcal/mol. Actually, according to **Scheme 6**, the **C-IN1** intermediate would interact with the OTf ligand strongly to give the more energetically favorable **T-IN1** and HOTf.

Scheme S4. Potential energy surface for the reaction via cationic intermediate C-C

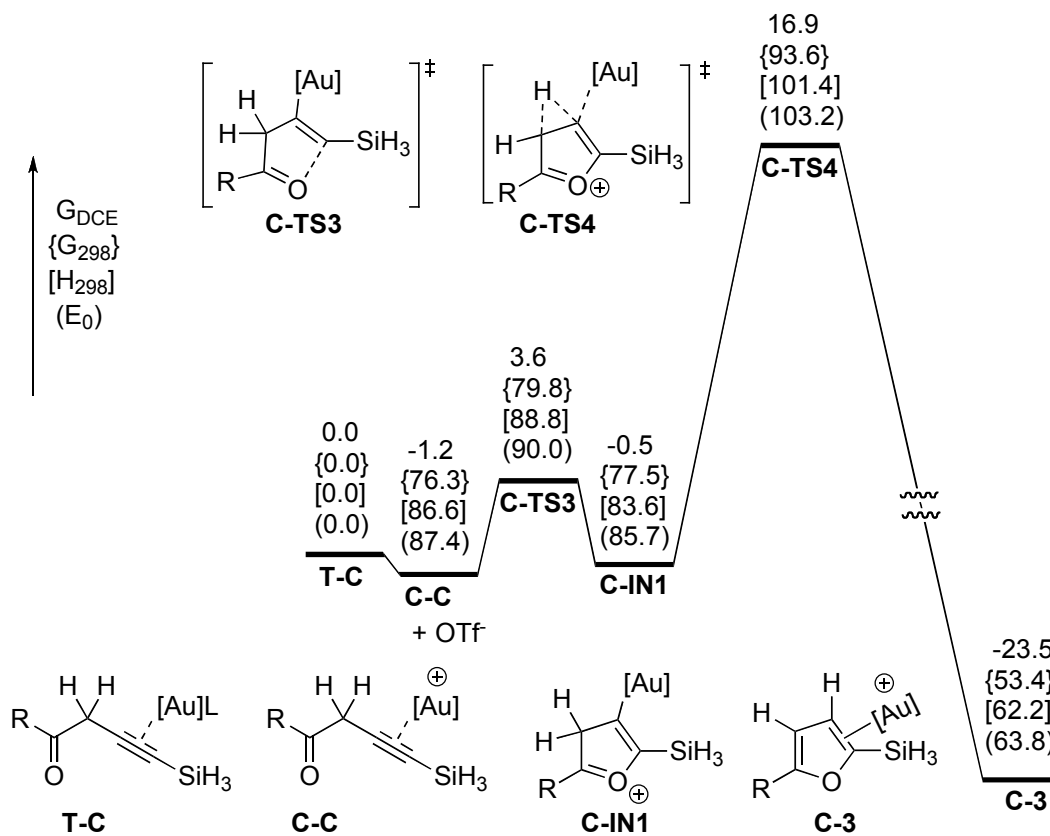



## 6. IRC Plots for Selected Transition States

### IRC analysis of TS4\_1-AuCl<sub>3</sub>

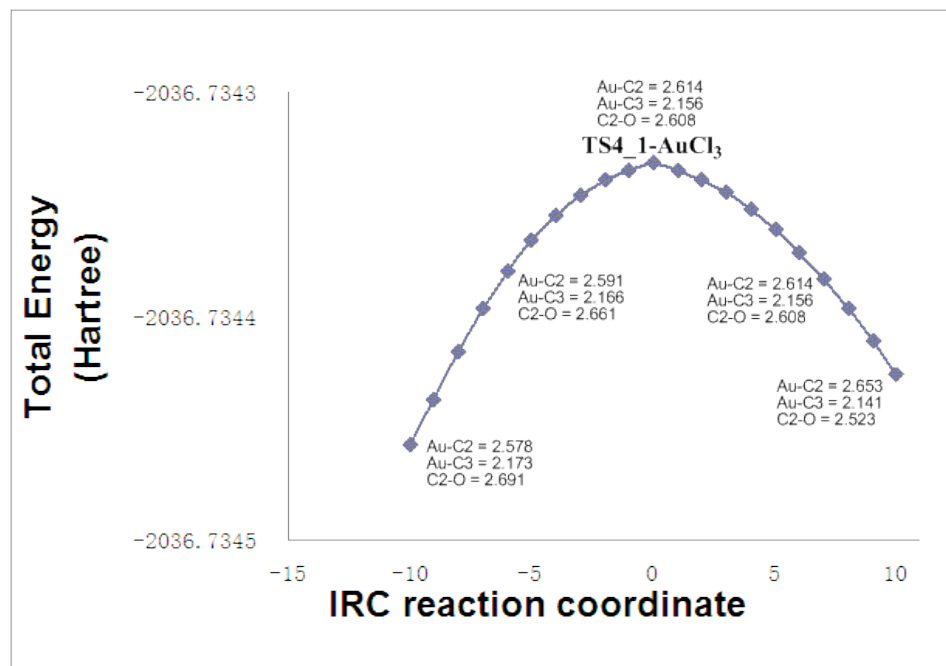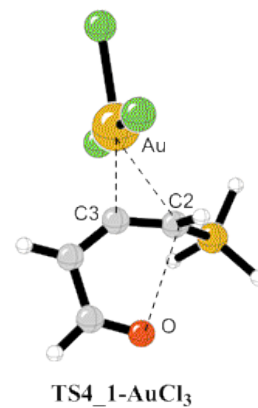

### IRC analysis of T-TS2

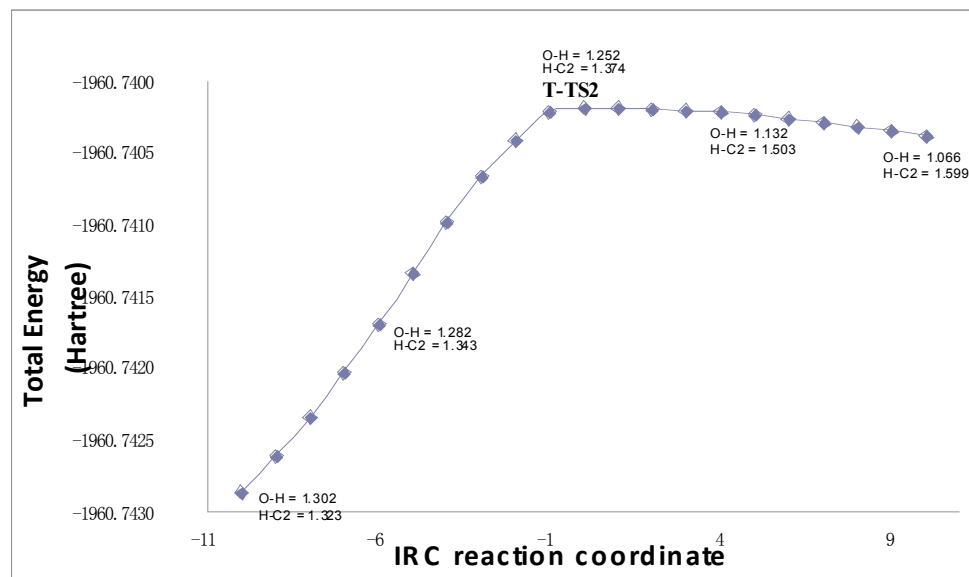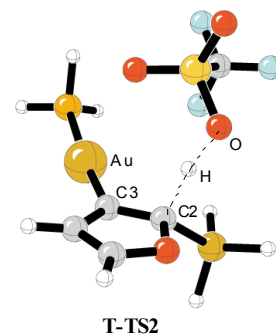

## IRC analysis of T-TS4

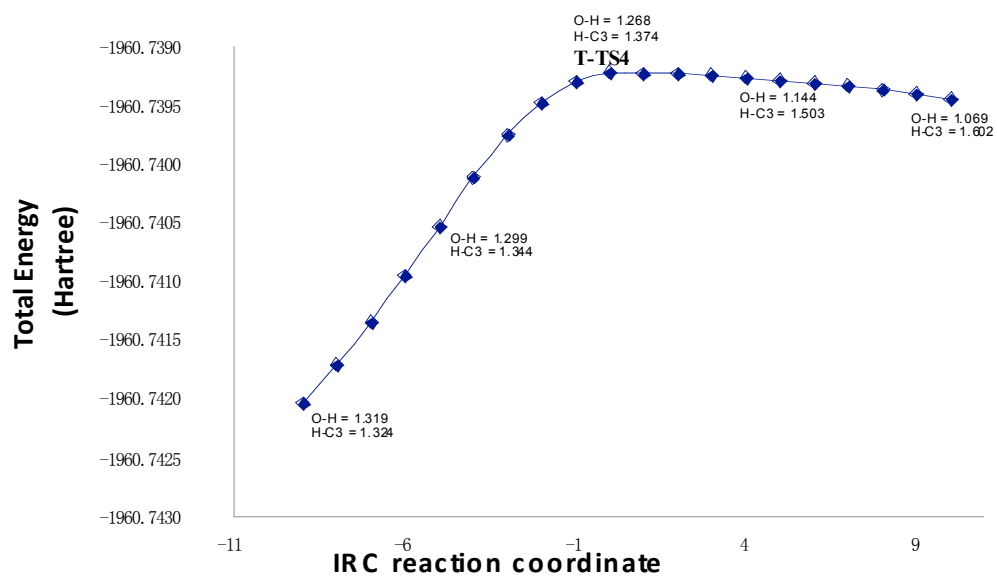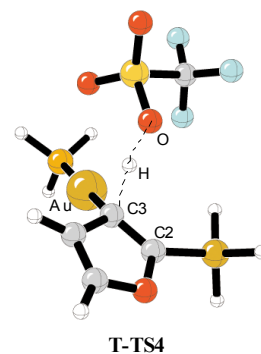IRC analysis of TS2-SbF<sub>6</sub>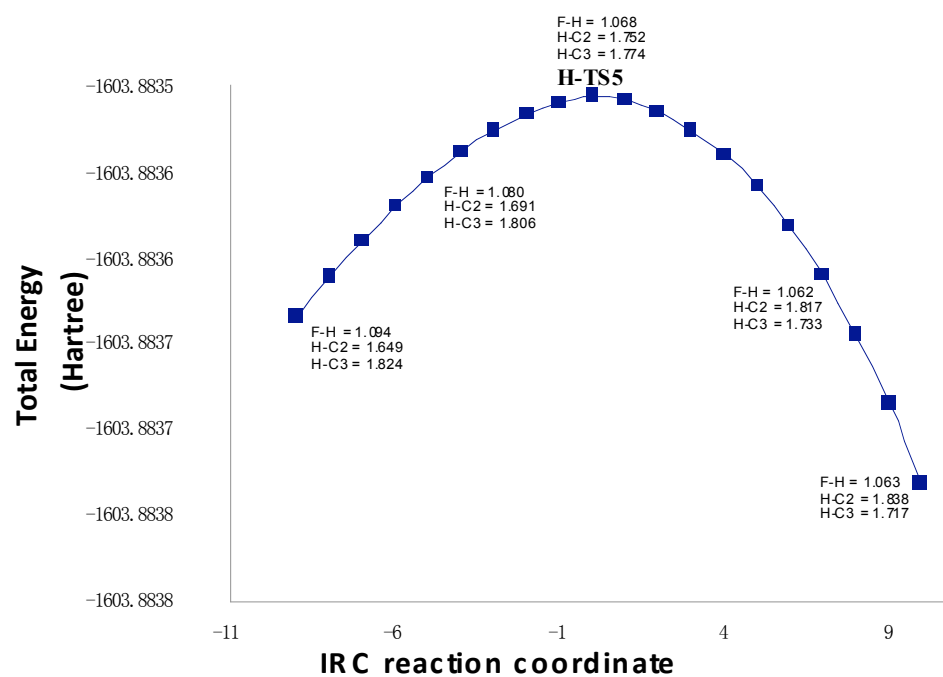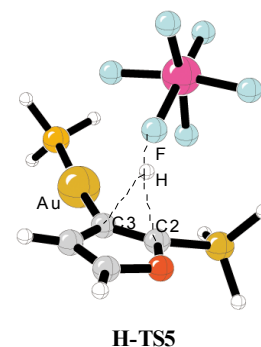

## 7. Tables of Computed Energy Values

**Table S1.** Gas phase free energies (in Hartree) for the species given in Scheme 2, calculated at B3LYP/6-31G\* (LANL2DZ for Au and Sb) level

| R  | Species | I'           | I,2-R TS     | I2-Si TS     |
|----|---------|--------------|--------------|--------------|
| Me |         | -2076.021117 | -2075.969677 | -2076.006245 |
| Ph |         | -2267.699090 | -2267.658300 | -2267.687319 |
| H  |         | -2036.730955 | -2036.694135 | -2036.711765 |

**Table S2.** Energies (in Hartree) for the species given in the Schemes 4, 6, 7, and 8 and the Supporting Information, calculated at B3LYP/6-31G\* (LANL2DZ for Au and Sb) level

| Species                         | E <sub>0</sub> <sup>a</sup> | H <sub>298</sub> <sup>b</sup> | G <sub>298</sub> <sup>c</sup> | E <sup>d</sup> | G <sub>DCE</sub> <sup>e</sup> | G <sub>Tot</sub> <sup>e</sup> |
|---------------------------------|-----------------------------|-------------------------------|-------------------------------|----------------|-------------------------------|-------------------------------|
| 4-AuCl <sub>3</sub>             | -2036.651647                | -2036.635544                  | -2036.697592                  | -2036.7378168  | -2036.727995                  | -2036.727250                  |
| TS4 1- AuCl <sub>3</sub>        | -2036.648233                | -2036.633113                  | -2036.692464                  | -2036.7343317  | -2036.727995                  | -2036.724981                  |
| 1-AuCl <sub>3</sub>             | -2036.687021                | -2036.672621                  | -2036.730816                  | -2036.777346   | -2036.779301                  | -2036.772992                  |
| TS1 2- AuCl <sub>3</sub>        | -2036.669935                | -2036.656278                  | -2036.712116                  | -2036.7601858  | -2036.762127                  | -2036.756877                  |
| TS1 3- AuCl <sub>3</sub>        | -2036.650983                | -2036.636798                  | -2036.694294                  | -2036.7370094  | -2036.736414                  | -2036.731634                  |
| 2- AuCl <sub>3</sub>            | -2036.698674                | -2036.684262                  | -2036.741588                  | -2036.7893276  | -2036.787867                  | -2036.783001                  |
| 3- AuCl <sub>3</sub>            | -2036.696242                | -2036.681788                  | -2036.739299                  | -2036.7866962  | -2036.784013                  | -2036.780207                  |
| T-C                             | -1960.592005                | -1960.568779                  | -1960.650726                  | -1960.731171   | -1960.726307                  | -1960.722515                  |
| T-TS1                           | -1960.575384                | -1960.553734                  | -1960.629608                  | -1960.715055   | -1960.713901                  | -1960.70894                   |
| T-IN2                           | -1960.613547                | -1960.59175                   | -1960.66957                   | -1960.755452   | -1960.741562                  | -1960.740994                  |
| T-IN1                           | -998.645426                 | -998.633142                   | -998.686647                   | -998.7477219   | -998.741234                   | -998.73994                    |
| T-TS2                           | -1960.602815                | -1960.581743                  | -1960.656818                  | -1960.740175   | -1960.731587                  | -1960.728895                  |
| T-1                             | -1960.610465                | -1960.589768                  | -1960.662967                  | -1960.754431   | -1960.751626                  | -1960.747924                  |
| T-TS4                           | -1960.602385                | -1960.581154                  | -1960.656988                  | -1960.73922    | -1960.730221                  | -1960.727881                  |
| T-3                             | -1960.625137                | -1960.603973                  | -1960.678305                  | -1960.768818   | -1960.766863                  | -1960.762807                  |
| T-TS3                           | -1960.594036                | -1960.573924                  | -1960.64455                   | -1960.73788    | -1960.736427                  | -1960.732741                  |
| T-2                             | -1960.624155                | -1960.6031                    | -1960.676783                  | -1960.768172   | -1960.766195                  | -1960.762611                  |
| T-TS5                           | -1960.5831                  | -1960.56084                   | -1960.638545                  | -1960.717856   | -1960.708192                  | -1960.705962                  |
| T-IN3                           | -1960.589205                | -1960.566198                  | -1960.646477                  | -1960.728217   | -1960.715282                  | -1960.713961                  |
| T-TS6                           | -1960.569209                | -1960.546633                  | -1960.625735                  | -1960.703006   | -1960.697042                  | -1960.69338                   |
| T-5                             | -1960.587766                | -1960.564979                  | -1960.644047                  | -1960.726781   | -1960.721512                  | -1960.717818                  |
| T-TS7                           | -1960.579081                | -1960.557628                  | -1960.632508                  | -1960.718943   | -1960.714167                  | -1960.711113                  |
| C-1                             | -999.010531                 | -998.999085                   | -999.049265                   | -999.1251372   | -999.167962                   | -999.148291                   |
| C-TS1                           | -998.993402                 | -998.981564                   | -999.033267                   | -999.107629    | -999.150271                   | -999.131275                   |
| C-TS2                           | -998.973819                 | -998.961638                   | -999.014657                   | -999.0842541   | -999.126155                   | -999.107289                   |
| C-2                             | -999.018656                 | -999.006099                   | -999.059616                   | -999.1334958   | -999.175586                   | -999.157005                   |
| C-3                             | -999.01965                  | -999.006988                   | -999.06241                    | -999.1340098   | -999.177157                   | -999.157333                   |
| TW3-C                           | -2189.805909                | -2189.77469                   | -2189.87339                   | -2190.021145   | -2190.007166                  | -2190.004258                  |
| TW3-TS1                         | -2189.804993                | -2189.775611                  | -2189.87072                   | -2190.019036   | -2190.003402                  | -2190.001942                  |
| TW3-IN1                         | -2189.818303                | -2189.788703                  | -2189.885661                  | -2190.033224   | -2190.018833                  | -2190.016385                  |
| TW3-IN2                         | -2189.828842                | -2189.799756                  | -2189.891665                  | -2190.04529    | -2190.028594                  | -2190.027057                  |
| TW3-TS2                         | -2189.799129                | -2189.769659                  | -2189.863805                  | -2190.011256   | -2189.994392                  | -2189.992795                  |
| TW3-5                           | -2189.802478                | -2189.771561                  | -2189.868995                  | -2190.017518   | -2190.002103                  | -2189.999922                  |
| H-C                             | -1603.777519                | -1603.753236                  | -1603.835949                  | -1603.903525   | -1603.893844                  | -1603.890779                  |
| H-TS1                           | -1603.760151                | -1603.737394                  | -1603.815245                  | -1603.886371   | -1603.880147                  | -1603.876103                  |
| H-IN1                           | -1603.764873                | -1603.742352                  | -1603.819036                  | -1603.892203   | -1603.88745                   | -1603.882801                  |
| H-TS2                           | -1603.753363                | -1603.731028                  | -1603.807844                  | -1603.878989   | -1603.861978                  | -1603.861438                  |
| (H <sub>2</sub> O) <sub>3</sub> | -229.193356                 | -229.18576                    | -229.221766                   | -229.2675348   | -229.272668                   | -229.270119                   |
| H-5                             | -1603.768971                | -1603.745185                  | -1603.825259                  | -1603.894822   | -1603.887407                  | -1603.882775                  |
| H-TS3                           | -1603.759284                | -1603.736529                  | -1603.814438                  | -1603.885197   | -1603.880147                  | -1603.876103                  |

---

|               |              |              |              |               |              |              |
|---------------|--------------|--------------|--------------|---------------|--------------|--------------|
| <b>H-1</b>    | -1603.791793 | -1603.769821 | -1603.844684 | -1603.921764  | -1603.91493  | -1603.911027 |
| <b>H-3</b>    | -1603.806078 | -1603.783674 | -1603.860573 | -1603.935871  | -1603.928631 | -1603.925113 |
| <b>H-TS5</b>  | -1603.758582 | -1603.736623 | -1603.81191  | -1603.883506  | -1603.866888 | -1603.865809 |
| <b>H-3</b>    | -1603.806078 | -1603.783674 | -1603.860573 | -1603.935871  | -1603.928631 | -1603.925113 |
| <b>H-TS4</b>  | -1603.776425 | -1603.754916 | -1603.828688 | -1603.906004  | -1603.895512 | -1603.898728 |
| <b>H-2</b>    | -1603.805398 | -1603.783133 | -1603.858901 | -1603.935546  | -1603.928581 | -1603.925189 |
| <b>HW-C1</b>  | -1832.988653 | -1832.956281 | -1833.055621 | -1833.190323  | -1833.171281 | -1833.167984 |
| <b>HW-TS1</b> | -1832.974012 | -1832.942683 | -1833.039697 | -1833.175407  | -1833.15784  | -1833.155153 |
| <b>HW-IN1</b> | -1833.020018 | -1832.990553 | -1833.083643 | -1833.225438  | -1833.204016 | -1833.203429 |
| <b>HW-TS4</b> | -1832.983416 | -1832.952622 | -1833.048289 | -1833.182739  | -1833.164773 | -1833.163002 |
| <b>HW-IN2</b> | -1832.993827 | -1832.96299  | -1833.058958 | -1833.196231  | -1833.178325 | -1833.17672  |
| <b>HW-TS5</b> | -1832.973800 | -1832.943768 | -1833.037595 | -1833.171485  | -1833.155395 | -1833.152101 |
| <b>HW-5</b>   | -1832.978571 | -1832.946408 | -1833.045494 | -1833.179646  | -1833.163723 | -1833.160121 |
| <b>HW-TS2</b> | -1833.009008 | -1832.979838 | -1833.071077 | -1833.2108229 | -1833.191849 | -1833.190098 |
| <b>HW-TS3</b> | -1833.007657 | -1832.978338 | -1833.070343 | -1833.2090997 | -1833.189439 | -1833.188197 |

<sup>a</sup> Sum of electronic and zero-point energies<sup>b</sup> Sum of electronic and thermal enthalpies<sup>c</sup> Sum of electronic and thermal free energies<sup>d</sup> Electronic energies<sup>e</sup> Total free energies in DCE and Toluene solutions, respectively

## 8. Cartesian Coordinates for All Species

**4- AuCl<sub>3</sub>**

|    |           |           |           |
|----|-----------|-----------|-----------|
| 6  | -2.239602 | -0.744975 | 0.073195  |
| 6  | -0.995740 | -0.325181 | 0.036425  |
| 1  | -0.737004 | 0.726189  | -0.040708 |
| 6  | -3.368940 | -1.466395 | 0.185111  |
| 6  | 0.104771  | -1.342106 | 0.113793  |
| 8  | -0.074145 | -2.528507 | 0.276535  |
| 14 | -3.975289 | -2.264929 | 1.827220  |
| 1  | -5.361982 | -1.828260 | 2.093990  |
| 1  | -3.945899 | -3.715656 | 1.512652  |
| 1  | -3.038055 | -1.931548 | 2.914695  |
| 79 | -4.038755 | 0.812169  | -0.037550 |
| 1  | -3.799653 | -1.835880 | -0.749829 |
| 17 | -3.697626 | 1.228213  | 2.281042  |
| 17 | -5.215941 | 2.831001  | -0.262157 |
| 17 | -4.311380 | 0.353589  | -2.358434 |
| 1  | 1.119647  | -0.910679 | 0.016943  |

**1-AuCl<sub>3</sub>**

|    |           |           |           |
|----|-----------|-----------|-----------|
| 6  | -3.600534 | 0.736501  | 0.713992  |
| 6  | -2.865689 | 1.883115  | 0.988565  |
| 6  | -1.999619 | 1.561584  | 2.030679  |
| 6  | -2.193947 | 0.148158  | 2.329210  |
| 1  | -2.453825 | -0.062878 | 3.372298  |
| 79 | -0.691890 | 2.768531  | 3.006843  |
| 1  | -2.953331 | 2.835263  | 0.485805  |
| 1  | -4.378022 | 0.560946  | -0.021955 |
| 8  | -3.285871 | -0.292464 | 1.468145  |
| 14 | -0.638851 | -0.963621 | 1.888186  |
| 1  | 0.495737  | -0.490708 | 2.701979  |
| 1  | -1.037404 | -2.349716 | 2.222252  |
| 1  | -0.414895 | -0.800619 | 0.434396  |
| 17 | 0.828162  | 4.199276  | 4.145157  |
| 17 | -0.200944 | 3.815131  | 0.921809  |
| 17 | -1.223762 | 1.634498  | 5.051170  |

**TS4\_1- AuCl<sub>3</sub>**

|    |           |           |           |
|----|-----------|-----------|-----------|
| 6  | -2.334949 | -0.423478 | 0.056743  |
| 6  | -1.026892 | -0.186632 | 0.058876  |
| 1  | -0.552194 | 0.784842  | 0.009887  |
| 6  | -3.154508 | -1.510986 | 0.164221  |
| 6  | -0.241837 | -1.439440 | 0.168538  |
| 8  | -0.760841 | -2.543168 | 0.242765  |
| 14 | -3.693493 | -2.331325 | 1.816010  |
| 1  | -5.091648 | -1.925863 | 2.080867  |
| 1  | -3.627986 | -3.783943 | 1.528454  |
| 1  | -2.764559 | -1.923792 | 2.885867  |
| 79 | -3.988064 | 0.953680  | -0.088397 |
| 1  | -3.560476 | -1.902626 | -0.773568 |
| 17 | -3.742836 | 1.353066  | 2.247203  |
| 17 | -5.522155 | 2.735728  | -0.296350 |
| 17 | -4.158154 | 0.444109  | -2.410705 |
| 1  | 0.856304  | -1.334245 | 0.199446  |

**TS1\_2- AuCl<sub>3</sub>**

|    |           |           |          |
|----|-----------|-----------|----------|
| 6  | -3.544712 | 0.762882  | 0.738309 |
| 6  | -2.719629 | 1.840874  | 0.770440 |
| 6  | -1.955195 | 1.750481  | 1.997571 |
| 6  | -2.388337 | 0.546792  | 2.581867 |
| 1  | -2.237337 | 0.146948  | 3.575221 |
| 79 | -0.926682 | 3.279675  | 2.967998 |
| 1  | -2.653732 | 2.641090  | 0.049406 |
| 1  | -4.284375 | 0.413407  | 0.032885 |
| 8  | -3.357607 | -0.036927 | 1.829055 |
| 14 | -0.371285 | 0.194610  | 1.585484 |
| 1  | 0.104890  | -0.750609 | 2.610803 |
| 1  | -0.966910 | -0.497072 | 0.420172 |
| 1  | 0.660962  | 1.165326  | 1.183649 |
| 17 | 0.172427  | 5.030168  | 4.135662 |
| 17 | -1.708146 | 4.852296  | 1.367121 |
| 17 | -0.095448 | 1.660258  | 4.531148 |

**TS1\_3- AuCl<sub>3</sub>**

|    |           |           |           |
|----|-----------|-----------|-----------|
| 6  | -3.593683 | 0.960887  | 0.421902  |
| 6  | -3.131269 | 2.061147  | 1.054576  |
| 6  | -1.967661 | 1.643539  | 1.815532  |
| 6  | -1.833432 | 0.244999  | 1.559148  |
| 1  | -2.335206 | 0.806821  | 2.716367  |
| 79 | -0.648821 | 2.815651  | 2.874239  |
| 1  | -3.517042 | 3.067630  | 0.998967  |
| 1  | -4.425170 | 0.776342  | -0.242673 |
| 8  | -2.842125 | -0.143318 | 0.729732  |
| 14 | -0.513681 | -1.079123 | 2.017969  |
| 1  | 0.733075  | -0.379739 | 2.369453  |
| 1  | -1.052272 | -1.914582 | 3.110954  |
| 1  | -0.381762 | -1.865929 | 0.769602  |
| 17 | 0.870746  | 4.168272  | 4.093936  |
| 17 | -0.478125 | 4.209473  | 0.958083  |
| 17 | -0.955699 | 1.296307  | 4.713655  |

**3-AuCl<sub>3</sub>**

|    |           |           |           |
|----|-----------|-----------|-----------|
| 6  | -2.966408 | 1.397833  | 0.170259  |
| 6  | -3.660214 | 1.606233  | 1.347392  |
| 6  | -2.827353 | 1.116848  | 2.359901  |
| 6  | -1.620048 | 0.641092  | 1.764462  |
| 1  | -3.020172 | 1.094028  | 3.424815  |
| 79 | -0.422349 | 2.433148  | 2.576965  |
| 1  | -4.624571 | 2.081616  | 1.450774  |
| 1  | -3.207767 | 1.626514  | -0.858841 |
| 8  | -1.797135 | 0.804426  | 0.376403  |
| 14 | -0.631570 | -0.970289 | 2.150822  |
| 1  | 0.821011  | -0.714879 | 2.115303  |
| 1  | -1.100340 | -1.526089 | 3.433906  |
| 1  | -1.013318 | -1.879797 | 1.039052  |
| 17 | 0.999909  | 4.144588  | 3.387412  |
| 17 | -0.793326 | 3.691747  | 0.599616  |
| 17 | -0.206864 | 1.221413  | 4.619905  |

**2-AuCl<sub>3</sub>**

|    |           |           |           |
|----|-----------|-----------|-----------|
| 6  | -3.690103 | 1.401739  | 1.038910  |
| 6  | -2.457029 | 1.120228  | 0.464643  |
| 6  | -1.562662 | 0.882227  | 1.517053  |
| 6  | -2.315588 | 1.101258  | 2.718498  |
| 1  | -2.220608 | 0.551133  | 3.647586  |
| 79 | -1.441130 | 3.070900  | 3.364351  |
| 1  | -2.242666 | 1.114390  | -0.594819 |
| 1  | -4.645722 | 1.657186  | 0.601295  |
| 8  | -3.654111 | 1.319488  | 2.357567  |
| 14 | 0.262594  | 0.368874  | 1.349655  |
| 1  | 0.543379  | -0.719738 | 2.310441  |
| 1  | 0.390659  | -0.122598 | -0.045794 |
| 1  | 1.141703  | 1.536652  | 1.564747  |
| 17 | -0.554941 | 5.095583  | 4.227058  |
| 17 | -2.776144 | 4.275184  | 1.812670  |
| 17 | -0.081089 | 1.756089  | 4.811389  |

|            |           |           |           |            |           |           |           |
|------------|-----------|-----------|-----------|------------|-----------|-----------|-----------|
| <b>T-1</b> |           |           |           | 15         | -0.835445 | 3.552642  | 5.139322  |
| 6          | -2.872049 | 0.786162  | -0.149981 | 1          | -0.569580 | 4.894935  | 4.790537  |
| 6          | -1.984275 | 1.711243  | 0.382798  | 1          | -1.763998 | 3.716532  | 6.174393  |
| 6          | -1.841852 | 1.416641  | 1.746303  | 1          | 0.341935  | 3.200529  | 5.809763  |
| 6          | -2.622292 | 0.212985  | 1.975282  | 16         | -1.135290 | -0.202157 | 5.975445  |
| 1          | -3.331308 | 0.208148  | 2.806231  | 6          | 0.703678  | -0.441524 | 5.833986  |
| 79         | -0.839708 | 2.329185  | 3.261140  | 9          | 1.281026  | -0.475564 | 7.038942  |
| 1          | -1.518399 | 2.516602  | -0.167841 | 9          | 0.998296  | -1.573901 | 5.182377  |
| 1          | -3.246536 | 0.669614  | -1.161422 | 9          | 1.249318  | 0.588735  | 5.139980  |
| 8          | -3.316777 | -0.080691 | 0.728145  | 8          | -1.239136 | 1.174983  | 6.531802  |
| 14         | -1.444357 | -1.342713 | 2.344582  | 8          | -1.610357 | -1.293160 | 6.826643  |
| 1          | -0.266291 | -1.017158 | 3.158938  | 8          | -1.562948 | -0.280871 | 4.535671  |
| 1          | -2.300835 | -2.443245 | 2.827082  |            |           |           |           |
| 1          | -0.992354 | -1.665331 | 0.956600  |            |           |           |           |
| 15         | 0.181468  | 3.220713  | 5.214184  |            |           |           |           |
| 1          | 0.513749  | 4.593358  | 5.269710  | <b>T-3</b> |           |           |           |
| 1          | -0.597003 | 3.071753  | 6.371800  | 6          | -3.085842 | 1.327816  | 0.268980  |
| 1          | 1.403564  | 2.646759  | 5.594548  | 6          | -3.910918 | 1.141761  | 1.345282  |
| 16         | -1.610604 | 0.076158  | 5.907178  | 6          | -3.156231 | 0.387147  | 2.281731  |
| 8          | -2.303659 | 1.049956  | 6.767518  | 6          | -1.877208 | 0.169759  | 1.735042  |
| 8          | -2.386955 | -0.373185 | 4.709059  | 1          | -3.470486 | 0.014196  | 3.249061  |
| 8          | -0.188819 | 0.406889  | 5.603841  | 79         | -1.018008 | 1.615597  | 3.289418  |
| 6          | -1.482348 | -1.484235 | 6.907525  | 1          | -4.923529 | 1.501990  | 1.455645  |
| 9          | -0.776532 | -1.269596 | 8.025397  | 1          | -3.220294 | 1.846970  | -0.670015 |
| 9          | -0.866111 | -2.440432 | 6.192058  | 8          | -1.879338 | 0.772675  | 0.460709  |
| 9          | -2.699234 | -1.927011 | 7.247016  | 14         | -0.732236 | -1.350032 | 1.879032  |
|            |           |           |           | 1          | -0.970125 | -1.978905 | 3.189456  |
| <b>T-2</b> |           |           |           | 1          | -1.108660 | -2.264062 | 0.767532  |
| 6          | -3.517814 | 1.927361  | 0.468586  | 1          | 0.676948  | -0.930284 | 1.699729  |
| 6          | -2.196818 | 1.637120  | 0.406258  | 15         | 0.111722  | 3.143674  | 4.630918  |
| 6          | -1.889244 | 0.767410  | 1.540726  | 1          | 0.723014  | 4.219364  | 3.948343  |
| 6          | -3.121720 | 0.635881  | 2.193865  | 1          | -0.653945 | 3.827805  | 5.582562  |
| 1          | -3.420251 | 0.025756  | 3.034954  | 1          | 1.189653  | 2.646961  | 5.372958  |
| 79         | -1.477137 | 2.120203  | 3.438288  | 16         | -1.391856 | 0.109005  | 6.406465  |
| 1          | -1.501153 | 1.966017  | -0.352828 | 6          | 0.105675  | -0.969584 | 6.171719  |
| 1          | -4.183059 | 2.528774  | -0.131918 | 9          | 0.877687  | -0.977088 | 7.262855  |
| 8          | -4.092992 | 1.324267  | 1.557753  | 9          | -0.242416 | -2.230578 | 5.882132  |
| 14         | -0.404528 | -0.431477 | 1.622501  | 9          | 0.856738  | -0.504577 | 5.137681  |
| 1          | 0.710918  | 0.082271  | 2.445111  | 8          | -0.787664 | 1.457636  | 6.593005  |
| 1          | -0.858245 | -1.763778 | 2.067449  | 8          | -2.098046 | -0.457053 | 7.556386  |
| 1          | 0.062883  | -0.502953 | 0.209642  | 8          | -2.083573 | -0.040939 | 5.084426  |



**T-5**

|    |           |           |           |
|----|-----------|-----------|-----------|
| 6  | -3.169840 | 0.004719  | -0.097976 |
| 6  | -2.082801 | 0.084892  | 0.733278  |
| 14 | -0.344582 | -0.537337 | 0.255962  |
| 1  | -0.383511 | -0.951178 | -1.167861 |
| 1  | 0.653329  | 0.535571  | 0.458037  |
| 1  | -0.042234 | -1.693249 | 1.134320  |
| 6  | -4.120315 | -0.688350 | -0.715378 |
| 1  | -2.262990 | 0.255834  | 1.798237  |
| 1  | -4.825493 | -0.230935 | -1.401620 |
| 6  | -4.225731 | -2.150590 | -0.464827 |
| 1  | -5.084939 | -2.639502 | -0.968779 |
| 8  | -3.452984 | -2.793348 | 0.217649  |
| 79 | -2.573973 | 2.056424  | -0.164495 |
| 15 | -3.529074 | 4.030612  | -1.279507 |
| 1  | -4.616716 | 4.018278  | -2.180033 |
| 1  | -3.963248 | 5.017382  | -0.376607 |
| 1  | -2.595933 | 4.768916  | -2.029128 |
| 6  | 0.881912  | 4.037125  | 2.040432  |
| 9  | 1.286223  | 4.100625  | 3.312663  |
| 9  | 1.460131  | 2.975353  | 1.458330  |
| 9  | 1.277019  | 5.143391  | 1.401678  |
| 16 | -0.969768 | 3.877290  | 1.975190  |
| 8  | -1.197946 | 3.812566  | 0.460086  |
| 8  | -1.503943 | 5.099908  | 2.578940  |
| 8  | -1.265425 | 2.584798  | 2.624160  |

**T-C**

|    |           |           |           |
|----|-----------|-----------|-----------|
| 6  | -2.975853 | 0.024218  | 0.065456  |
| 6  | -1.768552 | 0.255162  | -0.162384 |
| 14 | 0.068152  | 0.130735  | -0.349743 |
| 1  | 0.437580  | -1.303493 | -0.309250 |
| 1  | 0.456684  | 0.729840  | -1.648506 |
| 1  | 0.709424  | 0.872867  | 0.760445  |
| 6  | -4.185643 | -0.696060 | 0.475381  |
| 1  | -4.866858 | -0.028727 | 1.029578  |
| 1  | -4.761095 | -1.019628 | -0.405033 |
| 6  | -3.862404 | -1.923988 | 1.321416  |
| 1  | -4.768203 | -2.478953 | 1.643587  |
| 8  | -2.753702 | -2.285287 | 1.633099  |
| 79 | -2.900283 | 2.177918  | -0.449314 |
| 15 | -2.662275 | 4.493379  | -1.055803 |
| 1  | -3.532788 | 4.907801  | -2.077994 |
| 1  | -3.004191 | 5.398432  | -0.037293 |
| 1  | -1.450836 | 5.057938  | -1.508101 |
| 16 | -6.023677 | 2.974199  | 0.897522  |
| 6  | -5.140611 | 4.062288  | 2.122563  |
| 9  | -5.786555 | 4.104833  | 3.287166  |
| 9  | -3.888602 | 3.600087  | 2.347151  |
| 9  | -5.025308 | 5.317215  | 1.646868  |
| 8  | -5.934661 | 1.629764  | 1.504391  |
| 8  | -7.347698 | 3.574418  | 0.743907  |
| 8  | -5.142924 | 3.129834  | -0.329089 |

|              |           |           |           |              |           |           |           |
|--------------|-----------|-----------|-----------|--------------|-----------|-----------|-----------|
| <b>T-IN1</b> |           |           |           | 8            | -5.079886 | 1.316295  | 1.479599  |
| 6            | -3.027647 | -0.032132 | -0.466979 | 8            | -6.635969 | 3.045678  | 2.280270  |
| 6            | -2.176673 | -0.480663 | 0.521968  | 8            | -5.031106 | 3.597545  | 0.380405  |
| 14           | -0.768903 | 0.289659  | 1.460626  | <b>T-IN3</b> |           |           |           |
| 1            | 0.506151  | -0.456571 | 1.264005  | 6            | -2.742943 | -0.060220 | 0.037217  |
| 1            | -0.587035 | 1.681880  | 0.971508  | 6            | -1.731600 | 0.622090  | -0.369166 |
| 1            | -1.031036 | 0.329100  | 2.927324  | 14           | -0.037831 | -0.139668 | -0.611264 |
| 6            | -3.900035 | -1.144259 | -0.755639 | 1            | -0.057582 | -1.592039 | -0.289770 |
| 1            | -4.701891 | -1.170507 | -1.480861 | 1            | 0.389462  | 0.035663  | -2.025155 |
| 6            | -3.525602 | -2.166793 | 0.060573  | 1            | 0.950778  | 0.544051  | 0.262435  |
| 1            | -3.880905 | -3.177735 | 0.200400  | 6            | -3.789417 | -0.763190 | 0.504967  |
| 8            | -2.483726 | -1.795818 | 0.846800  | 1            | -5.165788 | 0.791329  | 0.470503  |
| 79           | -3.041096 | 1.802201  | -1.324207 | 1            | -4.412711 | -1.334733 | -0.183240 |
| 15           | -3.050137 | 3.967809  | -2.334566 | 6            | -3.999402 | -0.973676 | 1.950455  |
| 1            | -3.992750 | 4.926571  | -1.904555 | 1            | -4.821610 | -1.687154 | 2.177988  |
| 1            | -1.884472 | 4.757193  | -2.236329 | 8            | -3.373039 | -0.439391 | 2.848872  |
| 1            | -3.261584 | 4.072936  | -3.726265 | 79           | -2.037926 | 2.642918  | -0.694352 |
| <b>T-IN2</b> |           |           |           | 15           | -2.536002 | 4.926444  | -1.032975 |
| 6            | -3.007472 | -0.018142 | -0.471157 | 1            | -3.438886 | 5.229067  | -2.068754 |
| 6            | -2.186863 | -0.466346 | 0.548913  | 1            | -3.155796 | 5.596062  | 0.038525  |
| 14           | -0.756272 | 0.276790  | 1.488731  | 1            | -1.504592 | 5.840723  | -1.330602 |
| 1            | 0.485036  | -0.519088 | 1.285325  | 16           | -6.062474 | 2.797385  | 0.611307  |
| 1            | -0.538830 | 1.656767  | 0.987099  | 6            | -5.175781 | 3.198086  | 2.205224  |
| 1            | -1.030641 | 0.321902  | 2.950676  | 9            | -5.926047 | 2.866861  | 3.246334  |
| 6            | -3.883088 | -1.130026 | -0.770221 | 9            | -4.020573 | 2.533191  | 2.244220  |
| 1            | -4.375187 | 1.099077  | 0.808384  | 9            | -4.931988 | 4.513604  | 2.223429  |
| 1            | -4.667664 | -1.155246 | -1.513877 | 8            | -6.058251 | 1.194786  | 0.670391  |
| 6            | -3.537114 | -2.146224 | 0.065030  | 8            | -7.439006 | 3.229429  | 0.737773  |
| 1            | -3.904451 | -3.151824 | 0.209620  | 8            | -5.193321 | 3.281861  | -0.460923 |
| 8            | -2.513006 | -1.771710 | 0.874274  |              |           |           |           |
| 79           | -2.948916 | 1.790622  | -1.404163 |              |           |           |           |
| 15           | -3.042556 | 3.964513  | -2.372619 |              |           |           |           |
| 1            | -4.315173 | 4.416054  | -2.773003 |              |           |           |           |
| 1            | -2.664569 | 5.042506  | -1.548435 |              |           |           |           |
| 1            | -2.305636 | 4.293010  | -3.530778 |              |           |           |           |
| 16           | -5.358171 | 2.890254  | 1.615927  |              |           |           |           |
| 6            | -4.028504 | 3.347725  | 2.840344  |              |           |           |           |
| 9            | -4.214207 | 2.702874  | 3.986020  |              |           |           |           |
| 9            | -2.832126 | 3.024336  | 2.332357  |              |           |           |           |
| 9            | -4.075742 | 4.663000  | 3.048866  |              |           |           |           |

**T-TS1**

|    |           |           |           |
|----|-----------|-----------|-----------|
| 6  | -2.665438 | 0.154358  | -0.086971 |
| 6  | -1.558259 | -0.385190 | 0.291858  |
| 14 | 0.260670  | -0.608070 | 0.603019  |
| 1  | 0.705562  | -1.868310 | -0.036358 |
| 1  | 0.938881  | 0.559601  | -0.006617 |
| 1  | 0.501787  | -0.659493 | 2.063165  |
| 6  | -3.948186 | -0.555065 | 0.229534  |
| 1  | -4.612453 | 0.075264  | 0.870449  |
| 1  | -4.565412 | -0.775984 | -0.652787 |
| 6  | -3.536794 | -1.803706 | 0.926833  |
| 1  | -4.279149 | -2.532666 | 1.274445  |
| 8  | -2.343055 | -2.020550 | 1.132829  |
| 79 | -2.712253 | 2.079446  | -0.843716 |
| 15 | -3.114720 | 4.293381  | -1.541724 |
| 1  | -4.240416 | 4.446855  | -2.365004 |
| 1  | -3.403961 | 5.182064  | -0.495381 |
| 1  | -2.154810 | 5.032175  | -2.266615 |
| 16 | -5.871143 | 2.796706  | 1.168881  |
| 6  | -4.664044 | 3.755615  | 2.212165  |
| 9  | -5.013948 | 3.755792  | 3.500343  |
| 9  | -3.420026 | 3.226020  | 2.117704  |
| 9  | -4.582269 | 5.035889  | 1.793233  |
| 8  | -5.692473 | 1.403734  | 1.662568  |
| 8  | -7.166885 | 3.422661  | 1.442495  |
| 8  | -5.330215 | 3.012193  | -0.210952 |

**T-TS2**

|    |           |           |          |
|----|-----------|-----------|----------|
| 6  | -3.618666 | 0.741898  | 0.842574 |
| 6  | -2.905111 | 1.823393  | 1.306731 |
| 6  | -1.773726 | 1.309924  | 1.986911 |
| 6  | -1.878482 | -0.102364 | 1.923816 |
| 1  | -2.067686 | -0.487024 | 3.255496 |
| 79 | -0.433768 | 2.234835  | 3.205784 |
| 1  | -3.186998 | 2.860743  | 1.192767 |
| 1  | -4.550258 | 0.675271  | 0.294295 |
| 8  | -3.051592 | -0.415225 | 1.163498 |
| 14 | -0.454645 | -1.296267 | 1.530453 |
| 1  | 0.660046  | -1.007267 | 2.460948 |
| 1  | -0.939217 | -2.686749 | 1.702287 |
| 1  | -0.004870 | -1.106696 | 0.125281 |
| 15 | 0.967937  | 3.030722  | 4.951827 |
| 1  | 1.772378  | 4.182169  | 4.811434 |
| 1  | 0.299937  | 3.340844  | 6.149171 |
| 1  | 1.927179  | 2.118897  | 5.426787 |
| 16 | -1.953700 | 0.044237  | 5.578516 |
| 8  | -2.885870 | 1.171479  | 5.489866 |
| 8  | -2.101722 | -0.952089 | 4.400638 |
| 8  | -0.545725 | 0.338964  | 5.898455 |
| 6  | -2.558616 | -1.048401 | 6.959633 |
| 9  | -2.484779 | -0.363863 | 8.106578 |
| 9  | -1.801899 | -2.143500 | 7.055446 |
| 9  | -3.826286 | -1.404828 | 6.745117 |

**T-TS3**

|    |           |           |           |
|----|-----------|-----------|-----------|
| 6  | -3.335954 | 1.136845  | 0.018469  |
| 6  | -2.338247 | 1.890632  | 0.540637  |
| 6  | -2.154167 | 1.476475  | 1.923039  |
| 6  | -3.092346 | 0.445359  | 2.079401  |
| 1  | -3.426939 | -0.079466 | 2.964089  |
| 79 | -1.275404 | 2.531883  | 3.480504  |
| 1  | -1.779092 | 2.659693  | 0.027877  |
| 1  | -3.808941 | 1.088136  | -0.951518 |
| 8  | -3.801868 | 0.236487  | 0.936214  |
| 14 | -0.973318 | -0.456547 | 1.963088  |
| 1  | 0.316522  | -0.033713 | 2.524306  |
| 1  | -1.462187 | -1.768599 | 2.421968  |
| 1  | -0.874127 | -0.510221 | 0.479799  |
| 15 | -0.404725 | 3.679396  | 5.333955  |
| 1  | 0.044304  | 5.006950  | 5.154731  |
| 1  | -1.275911 | 3.846616  | 6.419663  |
| 1  | 0.719526  | 3.106699  | 5.945249  |
| 16 | -1.186669 | -0.191364 | 5.857102  |
| 6  | 0.625867  | -0.561955 | 5.655581  |
| 9  | 1.227340  | -0.675439 | 6.842871  |
| 9  | 0.814083  | -1.698772 | 4.967258  |
| 9  | 1.235421  | 0.437122  | 4.972469  |
| 8  | -1.177949 | 1.175986  | 6.434811  |
| 8  | -1.707284 | -1.264989 | 6.704393  |
| 8  | -1.673733 | -0.226380 | 4.432520  |

**T-TS4**

|    |           |           |          |
|----|-----------|-----------|----------|
| 6  | -3.684401 | 0.849752  | 0.751151 |
| 6  | -3.444584 | 1.414758  | 1.956585 |
| 6  | -2.209105 | 0.833968  | 2.470128 |
| 6  | -1.803307 | -0.055963 | 1.469892 |
| 1  | -2.322504 | 0.196354  | 3.682051 |
| 79 | -0.775106 | 2.047649  | 3.443603 |
| 1  | -4.067122 | 2.142059  | 2.459031 |
| 1  | -4.465108 | 0.945239  | 0.011653 |
| 8  | -2.693566 | -0.051408 | 0.443467 |
| 14 | -0.373891 | -1.275154 | 1.352277 |
| 1  | 0.428437  | -1.154747 | 2.589716 |
| 1  | -0.905351 | -2.653558 | 1.203214 |
| 1  | 0.461981  | -0.953198 | 0.166062 |
| 15 | 0.718864  | 3.400603  | 4.628324 |
| 1  | 1.622314  | 4.253196  | 3.962048 |
| 1  | 0.137905  | 4.313971  | 5.528229 |
| 1  | 1.606479  | 2.733354  | 5.493427 |
| 16 | -2.148874 | -0.113129 | 6.075298 |
| 6  | -0.505856 | -0.972526 | 6.230426 |
| 9  | 0.030819  | -0.713563 | 7.427174 |
| 9  | -0.637909 | -2.291306 | 6.085350 |
| 9  | 0.344267  | -0.522403 | 5.281966 |
| 8  | -1.809807 | 1.322354  | 6.122257 |
| 8  | -2.991219 | -0.678944 | 7.120211 |
| 8  | -2.585935 | -0.558569 | 4.666410 |

**T-TS5**

|    |           |           |           |
|----|-----------|-----------|-----------|
| 6  | -2.803448 | 0.017572  | 0.036074  |
| 6  | -1.726508 | 0.562382  | -0.341898 |
| 14 | -0.015167 | -0.146517 | -0.603914 |
| 1  | -0.023643 | -1.610071 | -0.353996 |
| 1  | 0.404722  | 0.117895  | -2.002337 |
| 1  | 0.926493  | 0.521684  | 0.326138  |
| 6  | -3.996759 | -0.509519 | 0.501462  |
| 1  | -4.909494 | 0.510804  | 0.567512  |
| 1  | -4.544248 | -1.144696 | -0.202632 |
| 6  | -4.032172 | -0.981754 | 1.929571  |
| 1  | -4.928842 | -1.593855 | 2.161098  |
| 8  | -3.208485 | -0.717623 | 2.776755  |
| 79 | -2.088409 | 2.619729  | -0.634077 |
| 15 | -2.650232 | 4.871690  | -0.942859 |
| 1  | -3.551594 | 5.133021  | -1.987364 |
| 1  | -3.301271 | 5.475745  | 0.144476  |
| 1  | -1.643237 | 5.819613  | -1.215345 |
| 16 | -5.975252 | 2.721293  | 0.561735  |
| 6  | -5.114156 | 3.270829  | 2.116604  |
| 9  | -5.840456 | 2.993190  | 3.194796  |
| 9  | -3.924142 | 2.652227  | 2.218689  |
| 9  | -4.896093 | 4.596421  | 2.064451  |
| 8  | -5.958609 | 1.191811  | 0.732177  |
| 8  | -7.325889 | 3.262023  | 0.625747  |
| 8  | -5.077612 | 3.175557  | -0.520070 |

**T-TS6**

|    |           |           |           |
|----|-----------|-----------|-----------|
| 6  | -2.903323 | -0.046161 | 0.106908  |
| 6  | -1.745838 | 0.574309  | 0.067599  |
| 14 | -0.256340 | -0.273482 | -0.752567 |
| 1  | -0.677284 | -1.566928 | -1.351355 |
| 1  | 0.292734  | 0.601654  | -1.819817 |
| 1  | 0.783759  | -0.503764 | 0.277382  |
| 6  | -4.041152 | -0.711868 | 0.233841  |
| 1  | -1.418632 | 1.221564  | 1.224358  |
| 1  | -4.844285 | -0.570524 | -0.484737 |
| 6  | -4.249125 | -1.673915 | 1.339113  |
| 1  | -5.263129 | -2.126906 | 1.338945  |
| 8  | -3.423629 | -1.977488 | 2.177491  |
| 79 | -2.363669 | 2.507300  | -0.722156 |
| 15 | -2.843474 | 4.671047  | -1.422341 |
| 1  | -3.506281 | 4.926289  | -2.638907 |
| 1  | -3.632566 | 5.416538  | -0.528903 |
| 1  | -1.726871 | 5.515668  | -1.554091 |
| 16 | -0.674914 | 3.159760  | 2.445117  |
| 6  | 1.013266  | 3.224983  | 1.667016  |
| 9  | 1.887519  | 2.493984  | 2.354320  |
| 9  | 0.944444  | 2.739191  | 0.405852  |
| 9  | 1.443018  | 4.487892  | 1.604650  |
| 8  | -1.000305 | 1.660492  | 2.335615  |
| 8  | -0.511186 | 3.594414  | 3.823893  |
| 8  | -1.510424 | 3.974236  | 1.534368  |

**T-TS7**

|    |           |           |           |
|----|-----------|-----------|-----------|
| 6  | -3.213157 | -0.105381 | -0.135574 |
| 6  | -2.235756 | 0.007645  | 0.814785  |
| 14 | -0.344486 | -0.149418 | 0.475916  |
| 1  | -0.209087 | -1.326583 | -0.422397 |
| 1  | 0.154346  | 1.050906  | -0.218484 |
| 1  | 0.304181  | -0.407539 | 1.777043  |
| 6  | -3.892671 | -1.160731 | -0.605421 |
| 1  | -2.519455 | 0.306715  | 1.826063  |
| 1  | -4.634355 | -1.144076 | -1.394355 |
| 6  | -3.531168 | -2.416406 | 0.081728  |
| 1  | -4.031698 | -3.338776 | -0.262181 |
| 8  | -2.714367 | -2.463979 | 0.991721  |
| 79 | -3.223780 | 1.973233  | -0.542155 |
| 15 | -3.379603 | 4.289224  | -1.024268 |
| 1  | -4.576015 | 4.773602  | -1.597940 |
| 1  | -3.225459 | 5.111938  | 0.102065  |
| 1  | -2.426833 | 4.781292  | -1.926282 |
| 6  | 0.831569  | 3.993694  | 2.011376  |
| 9  | 0.938069  | 4.024143  | 3.344291  |
| 9  | 1.642166  | 3.032312  | 1.539048  |
| 9  | 1.236671  | 5.170737  | 1.518927  |
| 16 | -0.924617 | 3.650511  | 1.508805  |
| 8  | -0.861992 | 3.681582  | 0.012451  |
| 8  | -1.731929 | 4.733323  | 2.099429  |
| 8  | -1.177524 | 2.286064  | 2.053836  |

**TW3-5**

|    |           |           |           |
|----|-----------|-----------|-----------|
| 6  | -2.190570 | -0.259868 | -0.146594 |
| 6  | -1.015834 | 0.053332  | -0.713105 |
| 14 | 0.645723  | 0.042893  | 0.209047  |
| 1  | 1.345935  | -1.215128 | -0.151028 |
| 1  | 1.450924  | 1.208496  | -0.227340 |
| 1  | 0.403822  | 0.098449  | 1.671209  |
| 6  | -3.222803 | -0.925297 | 0.361515  |
| 1  | -4.063462 | -0.395992 | 0.800665  |
| 1  | -0.998382 | 0.098783  | -1.838550 |
| 6  | -3.254285 | -2.397352 | 0.319586  |
| 1  | -4.068290 | -2.851779 | 0.915884  |
| 8  | -2.484629 | -3.116429 | -0.303592 |
| 79 | -2.214050 | 1.995444  | -0.268879 |
| 15 | -2.244314 | 4.363933  | -0.399200 |
| 1  | -2.545551 | 4.923572  | -1.650212 |
| 1  | -3.173870 | 5.003109  | 0.433914  |
| 1  | -1.066211 | 5.070432  | -0.076374 |
| 16 | -5.500263 | 2.399264  | -0.421311 |
| 8  | -6.039386 | 1.270606  | -1.213069 |
| 8  | -4.943219 | 3.523163  | -1.222368 |
| 8  | -3.753046 | 1.163744  | -2.895938 |
| 1  | -3.912632 | 2.112773  | -3.025429 |
| 1  | -4.570955 | 0.880172  | -2.436337 |
| 1  | -1.365038 | -1.025659 | -3.546309 |
| 8  | -1.270724 | -0.047652 | -3.607428 |
| 1  | -2.184248 | 0.301151  | -3.556430 |
| 8  | -4.601024 | 1.987571  | 0.707805  |
| 6  | -6.969683 | 3.131299  | 0.449904  |
| 9  | -6.576271 | 4.174896  | 1.193592  |
| 9  | -7.869143 | 3.552628  | -0.443054 |
| 9  | -7.537055 | 2.221549  | 1.247212  |
| 1  | -1.695306 | -2.839251 | -2.004848 |
| 8  | -1.475408 | -2.757380 | -2.954823 |
| 1  | -2.107400 | -3.339023 | -3.402026 |

**TW3-C**

|    |           |           |           |
|----|-----------|-----------|-----------|
| 6  | -2.608338 | -0.075944 | 0.154871  |
| 6  | -1.482611 | 0.126338  | -0.323449 |
| 14 | 0.277960  | -0.162408 | -0.820874 |
| 1  | 0.550474  | -1.612038 | -0.692591 |
| 1  | 0.462811  | 0.281673  | -2.222815 |
| 1  | 1.162043  | 0.623859  | 0.071392  |
| 6  | -3.859719 | -0.492977 | 0.762894  |
| 1  | -4.356152 | 0.340574  | 1.280900  |
| 1  | -4.589953 | -0.821128 | -0.025301 |
| 6  | -3.655328 | -1.649206 | 1.734074  |
| 1  | -4.594789 | -1.953351 | 2.238910  |
| 8  | -2.607139 | -2.212681 | 1.942477  |
| 79 | -2.362489 | 2.180574  | -0.710515 |
| 15 | -2.674780 | 4.465604  | -1.058924 |
| 1  | -3.386430 | 4.849234  | -2.205046 |
| 1  | -3.355963 | 5.112527  | -0.015519 |
| 1  | -1.494407 | 5.222814  | -1.203215 |
| 16 | -5.822200 | 3.521681  | 0.576110  |
| 8  | -5.885446 | 2.168729  | 1.187637  |
| 8  | -5.471340 | 3.498965  | -0.885338 |
| 8  | -4.707229 | 1.292383  | -2.319952 |
| 1  | -5.121379 | 2.029739  | -1.810458 |
| 1  | -4.739307 | 1.570034  | -3.248229 |
| 1  | -6.657067 | -0.744481 | -0.841516 |
| 8  | -5.900293 | -1.114396 | -1.352033 |
| 1  | -5.564427 | -0.346862 | -1.857267 |
| 8  | -5.087205 | 4.542543  | 1.340155  |
| 6  | -7.592025 | 4.091486  | 0.563232  |
| 9  | -7.689664 | 5.293864  | -0.009711 |
| 9  | -8.071682 | 4.157591  | 1.805948  |
| 9  | -8.346601 | 3.222644  | -0.142150 |
| 1  | -7.124055 | 0.861049  | 0.688824  |
| 8  | -7.737916 | 0.214411  | 0.283427  |
| 1  | -8.402965 | 0.771573  | -0.147244 |

**TW3-IN1**

|    |           |           |           |
|----|-----------|-----------|-----------|
| 6  | -0.002266 | -0.003263 | 0.003192  |
| 6  | -0.002042 | -0.000901 | 1.286644  |
| 14 | 1.642636  | 0.006705  | 2.196105  |
| 1  | 2.778376  | -0.016034 | 1.235220  |
| 1  | 1.743268  | 1.220769  | 3.046776  |
| 1  | 1.732287  | -1.189319 | 3.075751  |
| 6  | 0.023154  | 0.026496  | -1.343152 |
| 1  | 0.122488  | -0.905227 | -1.901973 |
| 1  | -1.961059 | -0.059786 | -1.499539 |
| 6  | 0.183809  | 1.284485  | -2.097129 |
| 1  | 0.323759  | 1.126703  | -3.190136 |
| 8  | 0.167445  | 2.408789  | -1.629137 |
| 79 | -1.711980 | 0.066508  | 2.456585  |
| 15 | -3.545533 | 0.186257  | 3.952840  |
| 1  | -4.254623 | 1.397180  | 3.997740  |
| 1  | -4.590433 | -0.747109 | 3.852792  |
| 1  | -3.183949 | 0.056504  | 5.311076  |
| 16 | -6.209212 | -0.508228 | 1.304174  |
| 8  | -6.003630 | -1.267135 | 0.036666  |
| 8  | -5.186778 | 0.577533  | 1.498594  |
| 8  | -4.339907 | 1.606046  | -0.809542 |
| 1  | -4.630656 | 1.306093  | 0.099800  |
| 1  | -5.167153 | 1.720686  | -1.305625 |
| 1  | -3.231736 | -1.130589 | -1.368855 |
| 8  | -2.916177 | -0.205190 | -1.755691 |
| 1  | -3.528070 | 0.585206  | -1.359413 |
| 8  | -6.479304 | -1.296462 | 2.510993  |
| 6  | -7.756446 | 0.449691  | 0.937002  |
| 9  | -8.087406 | 1.214405  | 1.979937  |
| 9  | -7.540423 | 1.249207  | -0.128445 |
| 9  | -8.767537 | -0.371961 | 0.656494  |
| 1  | -3.967264 | -3.055306 | -1.410752 |
| 8  | -3.726754 | -2.378482 | -0.758074 |
| 1  | -4.584943 | -2.095245 | -0.335526 |

**TW3-IN2**

|    |           |           |           |
|----|-----------|-----------|-----------|
| 6  | -1.792539 | -0.636701 | 0.615234  |
| 6  | -0.801993 | 0.079671  | 0.229230  |
| 14 | 0.938807  | -0.518135 | -0.111091 |
| 1  | 1.041606  | -1.993971 | 0.021658  |
| 1  | 1.359382  | -0.096627 | -1.471145 |
| 1  | 1.855926  | 0.118805  | 0.871805  |
| 6  | -2.900979 | -1.330107 | 0.946632  |
| 1  | -3.178371 | -1.470728 | 1.987805  |
| 1  | -1.224661 | 1.286757  | -2.801354 |
| 6  | -3.836568 | -1.712903 | -0.062862 |
| 1  | -4.808504 | -2.083382 | 0.296262  |
| 8  | -3.651284 | -1.640832 | -1.302566 |
| 79 | -1.372372 | 2.071200  | -0.058520 |
| 15 | -2.179800 | 4.274455  | -0.341116 |
| 1  | -2.619354 | 4.665614  | -1.617202 |
| 1  | -3.296111 | 4.564609  | 0.458067  |
| 1  | -1.308138 | 5.341904  | -0.037993 |
| 16 | -5.379849 | 2.177440  | 0.014489  |
| 8  | -5.597227 | 0.725055  | 0.108882  |
| 8  | -4.610017 | 2.555139  | -1.250341 |
| 8  | -4.143579 | 0.588644  | -2.733817 |
| 1  | -4.341514 | 1.422484  | -2.106494 |
| 1  | -4.188618 | -0.238431 | -2.173969 |
| 1  | -1.379340 | -0.210757 | -3.218203 |
| 8  | -1.690035 | 0.716311  | -3.437587 |
| 1  | -3.156713 | 0.669344  | -3.063022 |
| 8  | -4.884384 | 2.895914  | 1.196501  |
| 6  | -7.053704 | 2.907069  | -0.330645 |
| 9  | -6.951845 | 4.232123  | -0.498445 |
| 9  | -7.570983 | 2.370394  | -1.442020 |
| 9  | -7.876580 | 2.662373  | 0.693383  |
| 1  | -2.025405 | -1.765225 | -1.994554 |
| 8  | -1.201096 | -1.737756 | -2.543837 |
| 1  | -1.264421 | -2.490752 | -3.151423 |

**TW3-TS1**

|    |           |           |           |
|----|-----------|-----------|-----------|
| 6  | -2.108484 | -0.564174 | 0.359509  |
| 6  | -1.345458 | 0.285644  | -0.161537 |
| 14 | 0.460967  | 0.219015  | -0.665067 |
| 1  | 1.041442  | -1.080438 | -0.249115 |
| 1  | 0.542774  | 0.378534  | -2.135456 |
| 1  | 1.180135  | 1.332008  | 0.000025  |
| 6  | -3.005281 | -1.514099 | 0.874687  |
| 1  | -2.880563 | -1.713894 | 1.946514  |
| 1  | -4.147893 | -1.051212 | 0.836352  |
| 6  | -3.141938 | -2.788887 | 0.059180  |
| 1  | -3.723728 | -3.572324 | 0.585696  |
| 8  | -2.705042 | -2.955290 | -1.054487 |
| 79 | -2.371185 | 2.116368  | -0.519864 |
| 15 | -3.270055 | 4.245367  | -0.887104 |
| 1  | -3.896944 | 4.494438  | -2.114282 |
| 1  | -4.190346 | 4.685431  | 0.073988  |
| 1  | -2.295484 | 5.265098  | -0.863826 |
| 16 | -6.728845 | 3.204833  | -0.085621 |
| 8  | -7.841252 | 2.244344  | 0.098107  |
| 8  | -5.787562 | 2.859020  | -1.196971 |
| 8  | -6.588391 | 0.136911  | -1.473173 |
| 1  | -6.109754 | 0.973956  | -1.641066 |
| 1  | -7.433179 | 0.482149  | -1.130446 |
| 1  | -5.847447 | -0.070048 | 1.516414  |
| 8  | -5.575930 | -0.772640 | 0.862071  |
| 1  | -5.918681 | -0.477600 | -0.030138 |
| 8  | -6.033894 | 3.620296  | 1.161515  |
| 6  | -7.539587 | 4.764967  | -0.684888 |
| 9  | -6.598628 | 5.705869  | -0.897469 |
| 9  | -8.185512 | 4.543132  | -1.832574 |
| 9  | -8.404196 | 5.222419  | 0.222203  |
| 1  | -7.395570 | 1.246249  | 2.098248  |
| 8  | -6.524692 | 1.156786  | 2.525448  |
| 1  | -6.130960 | 2.029357  | 2.320452  |



**TW3-TS2**

|    |           |           |           |
|----|-----------|-----------|-----------|
| 6  | -1.946930 | -0.276570 | 0.103158  |
| 6  | -0.922100 | 0.162159  | -0.592222 |
| 14 | 0.890626  | -0.072601 | -0.102605 |
| 1  | 1.355898  | -1.364170 | -0.667990 |
| 1  | 1.689461  | 1.034490  | -0.682148 |
| 1  | 1.047927  | -0.082956 | 1.374706  |
| 6  | -3.010811 | -0.807718 | 0.700027  |
| 1  | -3.633552 | -0.192124 | 1.343307  |
| 1  | -1.171384 | 0.166695  | -1.900817 |
| 6  | -3.415987 | -2.185850 | 0.436759  |
| 1  | -4.264344 | -2.530024 | 1.055773  |
| 8  | -2.916248 | -2.955583 | -0.381103 |
| 79 | -1.706645 | 2.225605  | -0.273352 |
| 15 | -2.343680 | 4.461001  | -0.103052 |
| 1  | -2.708970 | 5.111649  | -1.289819 |
| 1  | -3.437658 | 4.688912  | 0.740812  |
| 1  | -1.389483 | 5.363813  | 0.413781  |
| 16 | -5.263430 | 2.149817  | -0.358129 |
| 8  | -5.567461 | 0.854192  | -1.013508 |
| 8  | -4.576307 | 3.131128  | -1.264305 |
| 8  | -3.853537 | 1.138098  | -3.218771 |
| 1  | -3.896166 | 2.065572  | -2.916646 |
| 1  | -4.484005 | 0.725278  | -2.589388 |
| 1  | -1.601846 | -0.969577 | -3.225498 |
| 8  | -1.448459 | 0.020883  | -3.160116 |
| 1  | -2.354763 | 0.458609  | -3.253257 |
| 8  | -4.652606 | 2.065534  | 0.988680  |
| 6  | -6.920840 | 2.937038  | -0.064089 |
| 9  | -6.753141 | 4.134206  | 0.519682  |
| 9  | -7.566561 | 3.111808  | -1.221631 |
| 9  | -7.664818 | 2.168504  | 0.737632  |
| 1  | -2.124397 | -2.732141 | -1.995390 |
| 8  | -1.868266 | -2.604170 | -2.937700 |
| 1  | -2.595336 | -2.994908 | -3.445399 |

**C-1**

|    |           |           |          |
|----|-----------|-----------|----------|
| 6  | -3.698894 | 0.690463  | 0.874794 |
| 6  | -2.983852 | 1.851778  | 1.170647 |
| 6  | -1.999391 | 1.512841  | 2.098451 |
| 6  | -2.113199 | 0.068261  | 2.300626 |
| 1  | -2.274460 | -0.260081 | 3.333291 |
| 79 | -0.661267 | 2.741528  | 3.017819 |
| 1  | -3.189060 | 2.826553  | 0.750063 |
| 1  | -4.534293 | 0.529291  | 0.201044 |
| 8  | -3.270468 | -0.363335 | 1.519415 |
| 14 | -0.579162 | -0.954423 | 1.609492 |
| 1  | 0.581701  | -0.557274 | 2.433433 |
| 1  | -0.934948 | -2.377283 | 1.784189 |
| 1  | -0.431805 | -0.569113 | 0.189967 |
| 15 | 0.874958  | 4.221230  | 4.097094 |
| 1  | 2.083613  | 4.482381  | 3.426612 |
| 1  | 0.418054  | 5.526620  | 4.352693 |
| 1  | 1.345073  | 3.843039  | 5.367615 |

**C-2**

|    |           |           |           |
|----|-----------|-----------|-----------|
| 6  | -3.804495 | 1.396131  | 1.753542  |
| 6  | -2.737542 | 1.720363  | 0.985583  |
| 6  | -1.559972 | 1.070264  | 1.578824  |
| 6  | -2.097548 | 0.398199  | 2.695213  |
| 1  | -1.657544 | -0.284651 | 3.409982  |
| 79 | -0.728908 | 2.643557  | 2.977356  |
| 1  | -2.751136 | 2.327240  | 0.090815  |
| 1  | -4.857144 | 1.632837  | 1.722063  |
| 8  | -3.413031 | 0.594559  | 2.801706  |
| 14 | -0.004494 | 0.505207  | 0.610309  |
| 1  | 0.933680  | -0.090705 | 1.589025  |
| 1  | -0.450123 | -0.489639 | -0.390704 |
| 1  | 0.589933  | 1.689037  | -0.050085 |
| 15 | 0.209898  | 4.378159  | 4.232785  |
| 1  | 1.533713  | 4.719999  | 3.908308  |
| 1  | -0.445503 | 5.619208  | 4.161747  |
| 1  | 0.288737  | 4.160569  | 5.618755  |

**C-3**

|    |           |           |           |
|----|-----------|-----------|-----------|
| 6  | -3.219530 | 1.514938  | 0.522452  |
| 6  | -3.548500 | 1.750484  | 1.817216  |
| 6  | -2.584337 | 1.011589  | 2.612446  |
| 6  | -1.737396 | 0.345267  | 1.695742  |
| 1  | -2.704726 | 0.732114  | 3.655458  |
| 79 | -0.807654 | 2.442026  | 2.860365  |
| 1  | -4.368397 | 2.351855  | 2.182938  |
| 1  | -3.623678 | 1.844020  | -0.423271 |
| 8  | -2.131395 | 0.687150  | 0.441798  |
| 14 | -0.430899 | -1.032957 | 1.874792  |
| 1  | -0.147840 | -1.113218 | 3.325332  |
| 1  | -1.028245 | -2.280074 | 1.350416  |
| 1  | 0.765536  | -0.632766 | 1.102813  |
| 15 | 0.786865  | 4.077316  | 3.363829  |
| 1  | 1.603868  | 4.490554  | 2.297828  |
| 1  | 0.284495  | 5.297884  | 3.846324  |
| 1  | 1.728735  | 3.730926  | 4.347238  |

**C-TS2**

|    |           |           |          |
|----|-----------|-----------|----------|
| 6  | -3.763409 | 0.920429  | 0.654216 |
| 6  | -3.292666 | 1.987145  | 1.343463 |
| 6  | -2.027565 | 1.590706  | 1.941752 |
| 6  | -1.872306 | 0.214823  | 1.555150 |
| 1  | -2.265616 | 0.629154  | 2.778924 |
| 79 | -0.643727 | 2.805068  | 2.876557 |
| 1  | -3.760149 | 2.957228  | 1.427202 |
| 1  | -4.649112 | 0.749434  | 0.058513 |
| 8  | -2.939607 | -0.158026 | 0.794289 |
| 14 | -0.431992 | -1.047846 | 1.724452 |
| 1  | 0.347449  | -0.596468 | 2.896711 |
| 1  | -1.043063 | -2.377464 | 1.917728 |
| 1  | 0.337588  | -0.950191 | 0.466632 |
| 15 | 0.930221  | 4.262752  | 3.890698 |
| 1  | 1.965077  | 4.745093  | 3.069839 |
| 1  | 0.423413  | 5.458788  | 4.429274 |
| 1  | 1.657312  | 3.754298  | 4.981718 |

**C-TS1**

|    |           |           |          |
|----|-----------|-----------|----------|
| 6  | -3.727478 | 0.797526  | 1.085158 |
| 6  | -2.963231 | 1.926274  | 1.186449 |
| 6  | -1.909198 | 1.645212  | 2.130639 |
| 6  | -2.098292 | 0.281519  | 2.445237 |
| 1  | -1.745559 | -0.302879 | 3.287207 |
| 79 | -0.675633 | 2.988476  | 3.089368 |
| 1  | -3.133219 | 2.859502  | 0.668987 |
| 1  | -4.614265 | 0.557718  | 0.514698 |
| 8  | -3.234645 | -0.204070 | 1.845468 |
| 14 | -0.398825 | 0.232987  | 1.062828 |
| 1  | 0.607359  | -0.314613 | 1.994452 |
| 1  | -1.048795 | -0.751771 | 0.172844 |
| 1  | 0.127735  | 1.375869  | 0.294720 |
| 15 | 0.640900  | 4.592384  | 4.247882 |
| 1  | 1.887426  | 4.924621  | 3.687722 |
| 1  | 0.066602  | 5.864921  | 4.416759 |
| 1  | 1.007231  | 4.276542  | 5.568374 |

**H-1**

|    |           |           |           |
|----|-----------|-----------|-----------|
| 6  | -3.382748 | 0.706692  | 0.186693  |
| 6  | -2.627933 | 1.816436  | 0.547943  |
| 6  | -2.022951 | 1.527359  | 1.777095  |
| 6  | -2.389682 | 0.152817  | 2.092181  |
| 1  | -2.854630 | -0.022774 | 3.073335  |
| 79 | -0.986881 | 2.637927  | 3.127116  |
| 1  | -2.563735 | 2.736226  | -0.016743 |
| 1  | -4.004439 | 0.532291  | -0.685271 |
| 8  | -3.321606 | -0.276147 | 1.049881  |
| 14 | -0.861709 | -1.089969 | 2.006738  |
| 1  | 0.403416  | -0.448613 | 2.397739  |
| 1  | -1.212240 | -2.275717 | 2.812485  |
| 1  | -0.804501 | -1.447986 | 0.562691  |
| 15 | 0.030280  | 3.694234  | 4.996792  |
| 1  | 1.180925  | 4.497989  | 4.863121  |
| 1  | -0.799835 | 4.561745  | 5.726704  |
| 1  | 0.423529  | 2.784148  | 5.991623  |
| 51 | -1.918212 | 0.222428  | 6.123650  |
| 9  | -2.301849 | 2.021581  | 5.667421  |
| 9  | -0.433802 | 0.875568  | 7.049360  |
| 9  | -0.807344 | 0.111939  | 4.576581  |

|            |           |           |           |            |           |           |           |
|------------|-----------|-----------|-----------|------------|-----------|-----------|-----------|
| 9          | -1.498371 | -1.540657 | 6.488232  | <b>H-3</b> |           |           |           |
| 9          | -3.045988 | 0.349415  | 7.579632  | 6          | -2.955525 | 1.444889  | 0.310607  |
| 9          | -3.320177 | -0.286871 | 4.973317  | 6          | -3.732944 | 1.352095  | 1.434980  |
| <b>H-2</b> |           |           |           | 6          | -2.949234 | 0.654859  | 2.387474  |
| 6          | -3.728526 | 1.599381  | 0.614102  | 6          | -1.694742 | 0.375358  | 1.801026  |
| 6          | -2.397482 | 1.477035  | 0.407884  | 1          | -3.242213 | 0.358179  | 3.389219  |
| 6          | -1.835239 | 0.806141  | 1.585106  | 79         | -0.726683 | 1.881005  | 3.173079  |
| 6          | -2.958514 | 0.593684  | 2.405501  | 1          | -4.735641 | 1.732594  | 1.565137  |
| 1          | -3.076676 | 0.091508  | 3.359601  | 1          | -3.128097 | 1.897680  | -0.656382 |
| 79         | -1.305413 | 2.441592  | 3.111976  | 8          | -1.751668 | 0.884209  | 0.483012  |
| 1          | -1.849368 | 1.793731  | -0.468298 | 14         | -0.599602 | -1.187849 | 2.009264  |
| 1          | -4.541838 | 2.025620  | 0.047359  | 1          | 0.723297  | -0.877271 | 2.593797  |
| 8          | -4.076069 | 1.067975  | 1.832737  | 1          | -1.335278 | -2.169740 | 2.830076  |
| 14         | -0.238922 | -0.245229 | 1.570628  | 1          | -0.408287 | -1.698587 | 0.627266  |
| 1          | -0.505163 | -1.557586 | 2.194160  | 15         | 0.246574  | 3.312694  | 4.726465  |
| 1          | 0.068276  | -0.422488 | 0.125181  | 1          | 1.487295  | 3.923366  | 4.460029  |
| 1          | 0.914225  | 0.430128  | 2.206147  | 1          | -0.533108 | 4.422031  | 5.089054  |
| 15         | -0.698003 | 3.947825  | 4.768847  | 1          | 0.460723  | 2.670882  | 5.955979  |
| 1          | 0.202817  | 4.994536  | 4.493354  | 51         | -2.209250 | 0.474857  | 6.414997  |
| 1          | -1.765503 | 4.646904  | 5.352820  | 9          | -2.286271 | 2.175996  | 5.561748  |
| 1          | -0.114266 | 3.297282  | 5.866856  | 9          | -0.567581 | 1.037814  | 7.116520  |
| 51         | -1.747117 | 0.236464  | 6.220858  | 9          | -1.237894 | -0.182145 | 4.910204  |
| 9          | -2.553025 | 1.855413  | 5.623639  | 9          | -2.082443 | -1.194833 | 7.193624  |
| 9          | -0.357350 | 1.308476  | 6.872054  | 9          | -3.166410 | 1.168424  | 7.834426  |
| 9          | -0.795961 | 0.165034  | 4.567471  | 9          | -3.755096 | 0.025041  | 5.456789  |
| 9          | -0.916423 | -1.329197 | 6.737236  |            |           |           |           |
| 9          | -2.713089 | 0.355948  | 7.789761  |            |           |           |           |
| 9          | -3.119993 | -0.666466 | 5.318391  |            |           |           |           |

---

| <b>H-5</b> |           |           |           | <b>H-C</b> |           |           |           |
|------------|-----------|-----------|-----------|------------|-----------|-----------|-----------|
| 6          | -2.189117 | 0.017695  | 0.761239  | 6          | -2.811613 | -0.010230 | 0.559459  |
| 6          | -0.977954 | 0.353187  | 0.278806  | 6          | -1.730821 | 0.291634  | 0.037009  |
| 14         | -0.435731 | -0.039340 | -1.509448 | 14         | -0.020132 | 0.266512  | -0.674619 |
| 1          | 0.477348  | -1.205978 | -1.438085 | 1          | 0.488318  | -1.120434 | -0.569489 |
| 1          | -1.643890 | -0.344309 | -2.306778 | 1          | -0.087758 | 0.697439  | -2.090033 |
| 1          | 0.291112  | 1.127161  | -2.067000 | 1          | 0.830445  | 1.199805  | 0.099533  |
| 6          | -3.246179 | -0.617099 | 1.219817  | 6          | -3.993292 | -0.585324 | 1.193548  |
| 1          | -0.201038 | 0.597883  | 1.009744  | 1          | -4.225092 | -0.058380 | 2.127638  |
| 6          | -3.139420 | -2.092756 | 1.454554  | 1          | -4.882130 | -0.423181 | 0.570782  |
| 1          | -4.044738 | -2.538670 | 1.909231  | 6          | -3.832723 | -2.076205 | 1.474177  |
| 8          | -2.169136 | -2.765292 | 1.175685  | 1          | -4.725732 | -2.521111 | 1.958825  |
| 79         | -2.288575 | 2.262319  | 0.222801  | 8          | -2.854287 | -2.731632 | 1.210033  |
| 15         | -2.873869 | 4.501233  | -0.246769 | 79         | -2.812740 | 2.319438  | 0.004907  |
| 1          | -3.544209 | 4.690461  | -1.464037 | 15         | -3.082769 | 4.594256  | -0.426553 |
| 1          | -3.757495 | 5.048909  | 0.694969  | 1          | -4.141399 | 4.955858  | -1.270126 |
| 1          | -1.846723 | 5.459894  | -0.340049 | 1          | -3.265422 | 5.429712  | 0.683322  |
| 51         | -5.845667 | 2.658014  | 1.643315  | 1          | -1.991685 | 5.215862  | -1.066303 |
| 9          | -5.473336 | 4.489499  | 1.784233  | 51         | -6.188305 | 2.518120  | 1.470307  |
| 9          | -7.508734 | 2.973001  | 0.907993  | 9          | -6.735176 | 3.348122  | 3.026315  |
| 9          | -5.072957 | 2.745903  | -0.103117 | 9          | -7.816259 | 2.758623  | 0.632859  |
| 9          | -4.076334 | 2.334632  | 2.265616  | 9          | -5.530602 | 4.145999  | 0.775774  |
| 9          | -6.001210 | 0.806312  | 1.406409  | 9          | -4.456101 | 2.264201  | 2.219917  |
| 9          | -6.480399 | 2.571598  | 3.373797  | 9          | -5.508188 | 1.702398  | -0.109928 |
| 1          | -4.189017 | -0.113943 | 1.424073  | 9          | -6.623112 | 0.814179  | 2.083311  |

---

| <b>H-IN1</b> |           |           |           | <b>H-TS1</b> |           |           |           |
|--------------|-----------|-----------|-----------|--------------|-----------|-----------|-----------|
| 6            | -2.809407 | 0.274497  | 0.410025  | 6            | -2.841916 | 0.267019  | 0.372456  |
| 6            | -1.765139 | -0.572367 | 0.463281  | 6            | -1.698318 | -0.334641 | 0.346520  |
| 14           | 0.042071  | -0.570968 | -0.034459 | 14           | 0.119000  | -0.553100 | 0.015276  |
| 1            | 0.298965  | -1.673472 | -0.995851 | 1            | 0.311644  | -1.709175 | -0.891136 |
| 1            | 0.315158  | 0.743479  | -0.654546 | 1            | 0.583550  | 0.701513  | -0.620349 |
| 1            | 0.893121  | -0.776908 | 1.165212  | 1            | 0.821704  | -0.789124 | 1.298074  |
| 6            | -3.987492 | -0.426858 | 1.030993  | 6            | -3.994113 | -0.490475 | 0.966383  |
| 1            | -4.415756 | 0.137369  | 1.881343  | 1            | -4.450274 | 0.041017  | 1.814323  |
| 1            | -4.870822 | -0.476208 | 0.369152  | 1            | -4.835976 | -0.602717 | 0.268610  |
| 6            | -3.457847 | -1.725041 | 1.407134  | 6            | -3.421834 | -1.801371 | 1.370321  |
| 1            | -3.937751 | -2.573534 | 1.886453  | 1            | -4.028860 | -2.582505 | 1.841933  |
| 8            | -2.225478 | -1.843631 | 1.109908  | 8            | -2.224644 | -2.015428 | 1.169387  |
| 79           | -3.039493 | 2.186722  | -0.280750 | 79           | -3.126665 | 2.209327  | -0.311656 |
| 15           | -3.513800 | 4.384661  | -1.000651 | 15           | -3.605987 | 4.393601  | -1.027488 |
| 1            | -4.546661 | 4.529934  | -1.940356 | 1            | -4.666176 | 4.534593  | -1.935141 |
| 1            | -3.914861 | 5.297050  | -0.012150 | 1            | -3.957169 | 5.317618  | -0.032171 |
| 1            | -2.490213 | 5.124044  | -1.630524 | 1            | -2.587755 | 5.102825  | -1.698212 |
| 51           | -6.709408 | 2.109282  | 0.940901  | 51           | -6.680600 | 2.164117  | 0.973036  |
| 9            | -7.496358 | 3.032711  | 2.336232  | 9            | -7.430979 | 3.046313  | 2.414647  |
| 9            | -7.052495 | 0.433337  | 1.691695  | 9            | -6.962531 | 0.470225  | 1.707368  |
| 9            | -8.273309 | 2.129118  | -0.045160 | 9            | -8.280758 | 2.163305  | 0.046634  |
| 9            | -6.089115 | 3.693977  | 0.137145  | 9            | -6.136414 | 3.781795  | 0.173175  |
| 9            | -5.858909 | 1.168221  | -0.471722 | 9            | -5.856924 | 1.282303  | -0.491461 |
| 9            | -5.080262 | 2.078243  | 1.917996  | 9            | -5.009438 | 2.162725  | 1.873515  |

**H-TS2**

|    |           |           |           |
|----|-----------|-----------|-----------|
| 6  | -2.875159 | -0.001964 | 0.024999  |
| 6  | -1.778203 | -0.383532 | 0.772234  |
| 14 | -0.070841 | 0.334780  | 1.018170  |
| 1  | 0.976485  | -0.619642 | 0.564919  |
| 1  | 0.015646  | 1.583616  | 0.222617  |
| 1  | 0.175395  | 0.639363  | 2.453396  |
| 6  | -3.883438 | -1.018476 | 0.291727  |
| 1  | -4.291967 | 0.484352  | 1.267583  |
| 1  | -4.868213 | -1.084772 | -0.150962 |
| 6  | -3.320006 | -1.922516 | 1.153934  |
| 1  | -3.675697 | -2.834078 | 1.612213  |
| 8  | -2.057946 | -1.562431 | 1.452321  |
| 79 | -3.127353 | 1.663586  | -1.120864 |
| 15 | -3.573006 | 3.649636  | -2.338081 |
| 1  | -4.883978 | 3.809138  | -2.826734 |
| 1  | -3.430784 | 4.868074  | -1.646868 |
| 1  | -2.849313 | 3.959866  | -3.508852 |
| 51 | -6.521806 | 2.139298  | 1.105382  |
| 9  | -6.372584 | 3.023749  | 2.709106  |
| 9  | -7.366101 | 0.725605  | 1.927870  |
| 9  | -8.026343 | 2.955046  | 0.453295  |
| 9  | -5.339411 | 3.366539  | 0.354858  |
| 9  | -6.198440 | 1.034045  | -0.353502 |
| 9  | -4.758014 | 1.164449  | 1.852798  |

**H-TS3**

|    |           |           |           |
|----|-----------|-----------|-----------|
| 6  | -2.385934 | -0.390543 | 0.193142  |
| 6  | -1.061742 | -0.192032 | 0.309690  |
| 1  | -0.566063 | 0.763927  | 0.430259  |
| 6  | -3.043850 | -1.594355 | 0.070186  |
| 6  | -0.358718 | -1.478362 | 0.270351  |
| 8  | -0.954182 | -2.551492 | 0.139355  |
| 14 | -3.699724 | -2.613980 | 1.549330  |
| 1  | -5.141770 | -2.314666 | 1.726837  |
| 1  | -3.527826 | -4.042885 | 1.202166  |
| 1  | -2.930227 | -2.224118 | 2.750504  |
| 79 | -3.960430 | 0.952656  | 0.164048  |
| 1  | -3.306122 | -1.924006 | -0.939473 |
| 1  | 0.737235  | -1.480676 | 0.367753  |
| 15 | -5.621370 | 2.662439  | 0.211999  |
| 1  | -6.040064 | 3.049034  | 1.495178  |
| 1  | -5.156001 | 3.873021  | -0.324424 |
| 1  | -6.863881 | 2.489753  | -0.430015 |
| 51 | -1.877853 | 4.082878  | 0.356784  |
| 9  | -2.362581 | 2.793154  | -0.953288 |
| 9  | -3.319788 | 5.110495  | -0.252146 |
| 9  | -3.132320 | 3.235449  | 1.524423  |
| 9  | -0.598679 | 2.853181  | 0.955585  |
| 9  | -1.470086 | 5.283969  | 1.699358  |
| 9  | -0.702242 | 4.854172  | -0.840753 |

**H-TS4**

|    |           |           |           |
|----|-----------|-----------|-----------|
| 6  | -3.489650 | 0.913307  | 0.191872  |
| 6  | -2.489820 | 1.779226  | 0.495369  |
| 6  | -2.104255 | 1.531299  | 1.874619  |
| 6  | -2.930587 | 0.460045  | 2.259212  |
| 1  | -3.133522 | 0.029373  | 3.237012  |
| 79 | -1.193078 | 2.800001  | 3.238855  |
| 1  | -2.062418 | 2.522635  | -0.161805 |
| 1  | -4.078186 | 0.733812  | -0.696139 |
| 8  | -3.765090 | 0.091797  | 1.245499  |
| 14 | -0.832908 | -0.331612 | 1.889203  |
| 1  | -1.069514 | -1.527098 | 2.717600  |
| 1  | -1.028536 | -0.676568 | 0.459178  |
| 1  | 0.495599  | 0.266536  | 2.099389  |
| 15 | -0.390221 | 4.093385  | 5.028155  |
| 1  | 0.571819  | 5.107147  | 4.845663  |
| 1  | -1.372765 | 4.799828  | 5.742707  |
| 1  | 0.188951  | 3.317814  | 6.045701  |
| 51 | -1.719053 | 0.269262  | 6.154120  |
| 9  | -2.447733 | 1.963367  | 5.729945  |
| 9  | -0.264106 | 1.181644  | 6.887287  |
| 9  | -0.787206 | 0.307703  | 4.478803  |
| 9  | -0.958427 | -1.383642 | 6.475736  |
| 9  | -2.668564 | 0.248476  | 7.736035  |
| 9  | -3.130734 | -0.498856 | 5.178519  |

**H-TS5**

|    |           |           |          |
|----|-----------|-----------|----------|
| 6  | -3.697699 | 0.752810  | 0.693905 |
| 6  | -3.203515 | 1.867374  | 1.294761 |
| 6  | -2.040646 | 1.462371  | 2.052914 |
| 6  | -1.936289 | 0.085467  | 1.854217 |
| 1  | -2.639885 | 0.486586  | 3.407807 |
| 79 | -0.867473 | 2.631314  | 3.249519 |
| 1  | -3.609294 | 2.866410  | 1.223721 |
| 1  | -4.544140 | 0.572106  | 0.046609 |
| 8  | -2.961220 | -0.337808 | 1.011165 |
| 14 | -0.626581 | -1.230138 | 2.203249 |
| 1  | 0.578670  | -0.575326 | 2.752261 |
| 1  | -1.146251 | -2.264583 | 3.127800 |
| 1  | -0.305799 | -1.870822 | 0.900018 |
| 15 | 0.358324  | 3.908442  | 4.823646 |
| 1  | 1.357019  | 4.817449  | 4.416341 |
| 1  | -0.391512 | 4.744615  | 5.672299 |
| 1  | 1.080445  | 3.176885  | 5.785157 |
| 51 | -2.165566 | 0.161199  | 6.157187 |
| 9  | -2.015848 | 2.020374  | 6.108029 |
| 9  | -1.261238 | -0.007149 | 7.745007 |
| 9  | -0.651495 | 0.098402  | 5.068110 |
| 9  | -2.403807 | -1.640253 | 5.856892 |
| 9  | -3.866462 | 0.327178  | 6.836228 |
| 9  | -3.168754 | 0.355605  | 4.325815 |

| HW-1 |           |           |           | HW-2 |           |           |           |
|------|-----------|-----------|-----------|------|-----------|-----------|-----------|
| 6    | -1.922390 | 0.310704  | 2.754793  | 6    | -1.404621 | 0.743948  | 1.749360  |
| 6    | -0.663952 | 0.724571  | 2.346339  | 6    | -0.398703 | 0.545781  | 2.628872  |
| 1    | -0.032557 | 0.200176  | 1.642769  | 1    | 0.277937  | -0.296839 | 2.656995  |
| 1    | -2.117226 | 3.201247  | 3.556188  | 1    | -1.943093 | 3.421804  | 3.448689  |
| 6    | -0.393283 | 1.940797  | 2.992839  | 6    | -0.399536 | 1.696855  | 3.545819  |
| 6    | -1.549712 | 2.231090  | 3.811830  | 6    | -1.471354 | 2.489238  | 3.090823  |
| 79   | 1.254526  | 3.109424  | 2.779692  | 79   | 1.107061  | 3.132631  | 2.640660  |
| 1    | -2.499646 | -0.567254 | 2.485837  | 1    | -1.777831 | 0.198887  | 0.896252  |
| 8    | -2.491151 | 1.132705  | 3.604336  | 8    | -2.056437 | 1.922758  | 2.026901  |
| 14   | -1.270243 | 2.418139  | 5.712458  | 14   | 0.187401  | 1.643862  | 5.350167  |
| 1    | -0.465237 | 3.643031  | 5.916853  | 1    | 0.152777  | 3.007642  | 5.926554  |
| 1    | -2.600849 | 2.529137  | 6.348787  | 1    | -0.712946 | 0.742388  | 6.114179  |
| 1    | -0.551139 | 1.220885  | 6.215814  | 1    | 1.564940  | 1.092995  | 5.398425  |
| 15   | 3.240461  | 4.403818  | 2.533685  | 15   | 3.057515  | 4.261831  | 2.036714  |
| 1    | 4.035487  | 4.161790  | 1.401841  | 1    | 3.718435  | 3.834793  | 0.876656  |
| 1    | 3.089015  | 5.797355  | 2.477121  | 1    | 2.952906  | 5.646068  | 1.855399  |
| 1    | 4.214925  | 4.290783  | 3.547705  | 1    | 4.097003  | 4.177353  | 2.984718  |
| 8    | -3.178093 | 4.482178  | 3.356605  | 8    | -3.075957 | 4.870039  | 3.669932  |
| 1    | -3.439956 | 4.417129  | 2.404828  | 1    | -3.517601 | 4.764397  | 2.797693  |
| 1    | -2.740526 | 5.368246  | 3.420967  | 1    | -2.635314 | 5.746523  | 3.592593  |
| 1    | -2.151733 | 7.182236  | 2.309731  | 1    | -2.145320 | 7.424095  | 2.129340  |
| 8    | -1.898189 | 6.931848  | 3.214514  | 8    | -1.739577 | 7.258885  | 2.995952  |
| 1    | -0.973249 | 6.655411  | 3.077995  | 1    | -0.883576 | 6.869901  | 2.741844  |
| 51   | 0.135772  | 5.780312  | 0.147371  | 51   | -0.092635 | 5.566156  | -0.142408 |
| 9    | 0.928377  | 7.425878  | -0.120878 | 9    | 0.712208  | 7.155000  | -0.626636 |
| 9    | 1.793706  | 4.901593  | 0.092033  | 9    | 1.544959  | 4.646757  | -0.267925 |
| 9    | 0.416361  | 5.992856  | 2.016403  | 9    | 0.364513  | 5.938375  | 1.669857  |
| 9    | -0.174483 | 5.508127  | -1.649606 | 9    | -0.566066 | 5.137703  | -1.871004 |
| 9    | -1.563239 | 6.572136  | 0.388379  | 9    | -1.741544 | 6.427008  | 0.181277  |
| 9    | -0.683989 | 4.116539  | 0.531347  | 9    | -0.868210 | 3.962215  | 0.480168  |
| 1    | -3.352588 | 5.328408  | 0.348168  | 1    | -3.263355 | 5.278727  | 0.585493  |
| 8    | -3.455112 | 4.395560  | 0.600220  | 8    | -3.724481 | 4.499972  | 0.944289  |
| 1    | -2.547762 | 4.061316  | 0.469123  | 1    | -3.071808 | 3.794689  | 0.804710  |



**HW-3**

|    |           |           |           |
|----|-----------|-----------|-----------|
| 6  | -1.020311 | -0.578612 | 4.096942  |
| 6  | -0.814406 | 0.129342  | 2.958831  |
| 1  | -0.676568 | -0.266076 | 1.962575  |
| 6  | -0.838645 | 1.530525  | 3.336836  |
| 6  | -1.069781 | 1.546085  | 4.725623  |
| 79 | 1.310105  | 2.049449  | 3.965003  |
| 1  | -1.079652 | -1.633280 | 4.320933  |
| 8  | -1.168565 | 0.256647  | 5.171431  |
| 14 | -1.501922 | 2.936304  | 5.938657  |
| 1  | -1.193945 | 4.216009  | 5.268504  |
| 1  | -2.942034 | 2.824982  | 6.279993  |
| 1  | -0.689685 | 2.753133  | 7.166925  |
| 15 | 3.549432  | 2.357482  | 4.522000  |
| 1  | 4.464431  | 2.492372  | 3.471201  |
| 1  | 3.827128  | 3.476159  | 5.319756  |
| 1  | 4.096325  | 1.313707  | 5.292200  |
| 8  | -1.197193 | 3.964571  | 1.744923  |
| 1  | -0.667007 | 3.929623  | 0.915665  |
| 1  | -0.840584 | 4.727240  | 2.252208  |
| 1  | 0.051241  | 6.750442  | 2.456213  |
| 8  | -0.037435 | 6.109262  | 3.179477  |
| 1  | 0.874633  | 5.780931  | 3.285070  |
| 51 | 3.447092  | 5.146040  | 1.680815  |
| 9  | 4.109007  | 6.806962  | 2.134522  |
| 9  | 4.925803  | 4.281320  | 2.430142  |
| 9  | 2.590062  | 5.022396  | 3.385391  |
| 9  | 4.185967  | 5.131403  | -0.007523 |
| 9  | 1.860646  | 5.918268  | 1.027080  |
| 9  | 2.684718  | 3.433725  | 1.362372  |
| 1  | 0.822514  | 4.817348  | -0.406209 |
| 8  | 0.558558  | 3.882563  | -0.444421 |
| 1  | 1.291684  | 3.456484  | 0.035731  |
| 1  | -0.971534 | 2.408614  | 2.671000  |

**HW-5**

|    |           |           |           |
|----|-----------|-----------|-----------|
| 6  | -2.281253 | 0.001657  | 0.492696  |
| 6  | -1.040647 | 0.389591  | 0.181217  |
| 14 | -0.140838 | -0.083811 | -1.428039 |
| 1  | 0.796682  | -1.184667 | -1.095534 |
| 1  | -1.132348 | -0.528975 | -2.436268 |
| 1  | 0.613962  | 1.092235  | -1.921170 |
| 6  | -3.383620 | -0.621460 | 0.875217  |
| 1  | -0.439245 | 0.843355  | 1.020260  |
| 6  | -3.287013 | -1.970128 | 1.475484  |
| 1  | -4.245532 | -2.519872 | 1.518446  |
| 8  | -2.265827 | -2.475622 | 1.917728  |
| 79 | -2.368852 | 2.254780  | -0.122547 |
| 15 | -2.993911 | 4.492758  | -0.437169 |
| 1  | -3.786468 | 4.777540  | -1.560453 |
| 1  | -3.746353 | 5.011702  | 0.623673  |
| 1  | -1.950481 | 5.424898  | -0.585033 |
| 51 | -5.816891 | 2.604801  | 1.845019  |
| 9  | -5.182515 | 4.346916  | 2.122054  |
| 9  | -7.493892 | 3.183424  | 1.343998  |
| 9  | -5.218765 | 2.775487  | 0.048442  |
| 9  | -4.037059 | 2.047518  | 2.299880  |
| 9  | -6.176074 | 0.811661  | 1.467284  |
| 9  | -6.279470 | 2.419634  | 3.622782  |
| 8  | 0.205373  | 1.614568  | 2.510103  |
| 1  | -0.452193 | 2.317044  | 2.701643  |
| 1  | -2.716433 | 3.136406  | 2.754056  |
| 8  | -1.857999 | 3.608853  | 2.758634  |
| 1  | -1.896718 | 4.210775  | 3.517479  |
| 1  | -4.365435 | -0.159554 | 0.814208  |
| 1  | -0.051065 | 0.844630  | 3.065629  |
| 1  | -1.031253 | -1.398551 | 2.972738  |
| 8  | -0.670426 | -0.794777 | 3.651644  |
| 1  | -1.325196 | -0.814819 | 4.364898  |

**HW-C1**

|    |           |           |           |
|----|-----------|-----------|-----------|
| 6  | -2.365682 | -0.528757 | 1.063113  |
| 6  | -2.340872 | -0.346516 | -0.160577 |
| 14 | -2.522601 | -0.536201 | -2.004694 |
| 1  | -1.369635 | -1.346829 | -2.471396 |
| 1  | -3.792306 | -1.249018 | -2.261605 |
| 1  | -2.497107 | 0.795158  | -2.641727 |
| 6  | -2.494635 | -0.876899 | 2.471287  |
| 1  | -2.285879 | -1.945643 | 2.615264  |
| 6  | -1.661714 | -0.058271 | 3.429544  |
| 1  | -1.618713 | -0.480672 | 4.452094  |
| 8  | -1.122690 | 0.997772  | 3.170651  |
| 79 | -2.128141 | 1.827709  | 0.512248  |
| 15 | -1.952719 | 4.140707  | 0.622512  |
| 1  | -2.566494 | 4.833385  | -0.429378 |
| 1  | -2.531013 | 4.732787  | 1.756114  |
| 1  | -0.665810 | 4.711175  | 0.646077  |
| 51 | -5.687414 | 2.847362  | -0.787976 |
| 9  | -7.086751 | 2.186437  | 0.283204  |
| 9  | -6.519424 | 2.322054  | -2.345800 |
| 9  | -6.406050 | 4.545225  | -0.825751 |
| 9  | -4.790491 | 3.309100  | 0.839168  |
| 9  | -4.131930 | 3.387754  | -1.671942 |
| 9  | -4.903331 | 1.117693  | -0.639303 |
| 1  | -5.548163 | 0.522748  | 3.260644  |
| 8  | -5.307049 | -0.425190 | 3.143638  |
| 1  | -5.808304 | -0.679350 | 2.334517  |
| 1  | -5.926097 | -0.209611 | 0.157868  |
| 8  | -6.591681 | -0.706241 | 0.668910  |
| 1  | -7.340527 | -0.088978 | 0.676735  |
| 1  | -3.576970 | -0.719696 | 2.779851  |
| 1  | -5.529834 | 2.706867  | 2.460443  |
| 8  | -6.155996 | 2.253805  | 3.053159  |
| 1  | -6.930065 | 2.158373  | 2.474310  |

**HW-IN1**

|    |           |           |           |
|----|-----------|-----------|-----------|
| 6  | -2.305376 | 0.182931  | 3.175634  |
| 6  | -1.349140 | 0.843168  | 2.467708  |
| 1  | -1.076291 | 0.656396  | 1.438079  |
| 1  | -2.163771 | 3.324459  | 3.136420  |
| 6  | -0.764949 | 1.828833  | 3.353502  |
| 6  | -1.444194 | 1.680505  | 4.552990  |
| 79 | 0.847129  | 3.019749  | 2.956476  |
| 1  | -2.992246 | -0.615817 | 2.935481  |
| 8  | -2.387586 | 0.668952  | 4.439250  |
| 14 | -1.277534 | 2.458302  | 6.244640  |
| 1  | -0.428379 | 3.669029  | 6.110202  |
| 1  | -2.613255 | 2.846087  | 6.771119  |
| 1  | -0.648865 | 1.524337  | 7.216866  |
| 15 | 2.810150  | 4.302651  | 2.513046  |
| 1  | 3.044188  | 4.739813  | 1.199158  |
| 1  | 2.986634  | 5.506523  | 3.218968  |
| 1  | 4.039858  | 3.676817  | 2.806127  |
| 8  | -2.750467 | 4.049866  | 2.776346  |
| 1  | -2.754129 | 3.970013  | 1.720757  |
| 1  | -2.308754 | 4.978854  | 3.007329  |
| 1  | -1.953142 | 6.778193  | 2.315352  |
| 8  | -1.706320 | 6.327503  | 3.147515  |
| 1  | -0.737736 | 6.237308  | 3.024439  |
| 51 | 0.275758  | 6.350395  | -0.066504 |
| 9  | 0.488707  | 8.177692  | 0.014932  |
| 9  | 2.069265  | 6.022615  | -0.401223 |
| 9  | 0.642920  | 6.241453  | 1.802128  |
| 9  | -0.212273 | 6.334508  | -1.841675 |
| 9  | -1.561995 | 6.544958  | 0.431272  |
| 9  | -0.036111 | 4.479622  | 0.021522  |
| 1  | -2.788316 | 4.962168  | 0.021441  |
| 8  | -2.668979 | 4.020717  | 0.250144  |
| 1  | -1.713869 | 3.896906  | 0.050000  |

**HW-IN2**

|    |           |           |           |
|----|-----------|-----------|-----------|
| 6  | -2.472851 | -0.497964 | 0.356941  |
| 6  | -1.945760 | 0.447364  | -0.331166 |
| 14 | -0.450291 | 0.026174  | -1.392197 |
| 1  | -0.125558 | -1.422831 | -1.299733 |
| 1  | -0.730254 | 0.366543  | -2.812819 |
| 1  | 0.722253  | 0.821318  | -0.943859 |
| 6  | -2.944632 | -1.524213 | 1.093090  |
| 1  | -4.395986 | -0.657621 | 2.112334  |
| 1  | -3.659741 | -2.220919 | 0.652808  |
| 6  | -2.290194 | -1.929507 | 2.352870  |
| 1  | -2.665895 | -2.896865 | 2.753970  |
| 8  | -1.427079 | -1.304542 | 2.943688  |
| 79 | -2.525351 | 2.434912  | -0.362576 |
| 15 | -2.924466 | 4.755714  | -0.577928 |
| 1  | -3.641291 | 5.188523  | -1.706637 |
| 1  | -3.602431 | 5.431047  | 0.449043  |
| 1  | -1.772847 | 5.560888  | -0.697696 |
| 51 | -6.362870 | 3.115592  | 0.979735  |
| 9  | -7.484142 | 4.572925  | 1.076946  |
| 9  | -7.651930 | 2.018245  | 0.171869  |
| 9  | -5.662818 | 3.674703  | -0.652154 |
| 9  | -4.985852 | 3.973875  | 1.924064  |
| 9  | -5.249563 | 1.597468  | 0.976927  |
| 9  | -7.005499 | 2.498137  | 2.672677  |
| 1  | -4.837205 | 0.474517  | 3.248251  |
| 8  | -5.081559 | -0.454564 | 2.816011  |
| 1  | -6.018725 | -0.357163 | 2.366326  |
| 1  | -7.466654 | 0.326401  | 1.040778  |
| 8  | -7.454146 | -0.152790 | 1.894852  |
| 1  | -7.799219 | 0.526090  | 2.503077  |
| 1  | -5.538849 | 2.231997  | 3.721772  |
| 8  | -4.659354 | 1.821401  | 3.861512  |
| 1  | -4.082523 | 2.359856  | 3.290884  |

**HW-TS1**

|    |           |           |           |
|----|-----------|-----------|-----------|
| 6  | -2.825915 | 0.313416  | 0.438611  |
| 6  | -1.676068 | -0.194320 | 0.197890  |
| 14 | 0.069716  | -0.498833 | -0.345304 |
| 1  | 0.096431  | -1.658149 | -1.266111 |
| 1  | 0.516711  | 0.730755  | -1.043683 |
| 1  | 0.911558  | -0.758438 | 0.844591  |
| 6  | -3.867584 | -0.439421 | 1.202093  |
| 1  | -4.092186 | 0.037226  | 2.200806  |
| 1  | -4.842236 | -0.484519 | 0.701605  |
| 6  | -3.277503 | -1.784436 | 1.450319  |
| 1  | -3.872408 | -2.545163 | 1.975077  |
| 8  | -2.126390 | -2.047473 | 1.116427  |
| 79 | -3.147744 | 2.218055  | -0.347176 |
| 15 | -3.652329 | 4.340200  | -1.215981 |
| 1  | -4.448808 | 4.381519  | -2.371098 |
| 1  | -4.344564 | 5.220679  | -0.370325 |
| 1  | -2.569640 | 5.151665  | -1.610276 |
| 51 | -6.976028 | 1.858783  | -0.139367 |
| 9  | -8.125927 | 2.568091  | 1.153271  |
| 9  | -7.210827 | 0.138757  | 0.594024  |
| 9  | -8.338028 | 1.646774  | -1.361411 |
| 9  | -6.524489 | 3.564326  | -0.767456 |
| 9  | -5.705211 | 1.113598  | -1.294413 |
| 9  | -5.604408 | 2.100041  | 1.163793  |
| 1  | -4.282442 | 1.675916  | 3.752631  |
| 8  | -4.572563 | 0.745372  | 3.850715  |
| 1  | -5.553467 | 0.793038  | 3.765921  |
| 1  | -7.686019 | 1.648286  | 2.968874  |
| 8  | -7.360283 | 0.810425  | 3.339935  |
| 1  | -7.368561 | 0.240589  | 2.550803  |
| 1  | -4.761077 | 4.013688  | 3.647089  |
| 8  | -4.196480 | 3.483302  | 3.063732  |
| 1  | -4.794484 | 3.153864  | 2.366049  |

**HW-TS2**

|    |           |           |           |
|----|-----------|-----------|-----------|
| 6  | -2.068718 | 0.237460  | 3.028542  |
| 6  | -0.885284 | 0.656297  | 2.456498  |
| 1  | -0.344652 | 0.135249  | 1.678685  |
| 1  | -2.284936 | 3.189029  | 3.531831  |
| 6  | -0.535998 | 1.881992  | 3.068200  |
| 6  | -1.585929 | 2.182264  | 3.986508  |
| 79 | 1.116627  | 3.008390  | 2.685105  |
| 1  | -2.684711 | -0.634466 | 2.842923  |
| 8  | -2.515074 | 1.075431  | 3.947559  |
| 14 | -1.270590 | 2.740236  | 5.780331  |
| 1  | -0.507109 | 4.009030  | 5.717300  |
| 1  | -2.581438 | 2.952274  | 6.438052  |
| 1  | -0.497642 | 1.709453  | 6.519309  |
| 15 | 3.170047  | 4.167863  | 2.321222  |
| 1  | 3.792424  | 4.059339  | 1.067801  |
| 1  | 3.210557  | 5.554539  | 2.531214  |
| 1  | 4.226649  | 3.753001  | 3.158956  |
| 8  | -3.124229 | 4.129824  | 3.089387  |
| 1  | -3.158276 | 4.042229  | 2.087583  |
| 1  | -2.728181 | 5.039501  | 3.256591  |
| 1  | -2.243663 | 6.924031  | 2.434571  |
| 8  | -2.010697 | 6.555169  | 3.305281  |
| 1  | -1.055633 | 6.387679  | 3.184797  |
| 51 | 0.213016  | 6.154027  | 0.216898  |
| 9  | 0.639440  | 7.942520  | 0.366721  |
| 9  | 2.002161  | 5.641462  | 0.071365  |
| 9  | 0.394467  | 5.987748  | 2.104003  |
| 9  | -0.030642 | 6.239172  | -1.607967 |
| 9  | -1.620557 | 6.536828  | 0.521420  |
| 9  | -0.270987 | 4.320785  | 0.189735  |
| 1  | -3.037605 | 5.022373  | 0.203795  |
| 8  | -3.002125 | 4.073024  | 0.415017  |
| 1  | -2.056655 | 3.880273  | 0.255826  |

**HW-TS3**

|    |           |           |           |
|----|-----------|-----------|-----------|
| 6  | -1.385091 | -0.535068 | 3.516595  |
| 6  | -1.110699 | 0.396249  | 2.574736  |
| 1  | -1.013516 | 0.221842  | 1.511875  |
| 1  | -1.785676 | 2.661881  | 2.793067  |
| 6  | -1.000317 | 1.683545  | 3.255539  |
| 6  | -1.223537 | 1.379240  | 4.604256  |
| 79 | 0.695161  | 2.907093  | 2.845812  |
| 1  | -1.561490 | -1.599975 | 3.500328  |
| 8  | -1.458886 | 0.051963  | 4.757747  |
| 14 | -1.321018 | 2.459195  | 6.144020  |
| 1  | -1.219350 | 3.868710  | 5.699363  |
| 1  | -2.608677 | 2.215822  | 6.840999  |
| 1  | -0.202039 | 2.131578  | 7.064885  |
| 15 | 2.691571  | 4.077468  | 2.456915  |
| 1  | 3.041191  | 4.319503  | 1.120153  |
| 1  | 2.807851  | 5.357932  | 3.022205  |
| 1  | 3.857628  | 3.467990  | 2.961566  |
| 8  | -2.717859 | 3.462411  | 2.335540  |
| 1  | -2.726938 | 3.324552  | 1.338790  |
| 1  | -2.406318 | 4.409221  | 2.467087  |
| 1  | -2.021164 | 6.235665  | 1.494810  |
| 8  | -1.836411 | 5.994858  | 2.421507  |
| 1  | -0.861561 | 5.970777  | 2.412020  |
| 51 | 0.492313  | 5.609827  | -0.590457 |
| 9  | 0.700305  | 7.423480  | -0.838306 |
| 9  | 2.321541  | 5.277978  | -0.687059 |
| 9  | 0.695652  | 5.854283  | 1.291206  |
| 9  | 0.204756  | 5.249072  | -2.373818 |
| 9  | -1.373642 | 5.831841  | -0.320068 |
| 9  | 0.227291  | 3.769337  | -0.191445 |
| 1  | -2.641359 | 4.131586  | -0.646021 |
| 8  | -2.476405 | 3.228937  | -0.323319 |
| 1  | -1.501336 | 3.176668  | -0.381474 |

**HW-TS4**

|    |           |           |           |
|----|-----------|-----------|-----------|
| 6  | -2.592745 | -0.402913 | 0.385020  |
| 6  | -1.988242 | 0.436928  | -0.330733 |
| 14 | -0.497481 | 0.027024  | -1.407805 |
| 1  | -0.246065 | -1.435285 | -1.390377 |
| 1  | -0.774253 | 0.468046  | -2.796673 |
| 1  | 0.678940  | 0.755751  | -0.877745 |
| 6  | -3.189737 | -1.339480 | 1.233734  |
| 1  | -4.028051 | -0.784713 | 1.991426  |
| 1  | -3.837088 | -2.065014 | 0.725088  |
| 6  | -2.264240 | -1.985692 | 2.247501  |
| 1  | -2.732040 | -2.847377 | 2.765634  |
| 8  | -1.145811 | -1.611954 | 2.512323  |
| 79 | -2.552217 | 2.465410  | -0.328494 |
| 15 | -2.905896 | 4.773054  | -0.531069 |
| 1  | -3.567256 | 5.204034  | -1.691553 |
| 1  | -3.638605 | 5.404329  | 0.482845  |
| 1  | -1.746278 | 5.572378  | -0.580299 |
| 51 | -6.318983 | 3.054571  | 0.903936  |
| 9  | -7.445085 | 4.514849  | 0.881254  |
| 9  | -7.525620 | 1.935806  | 0.016962  |
| 9  | -5.530554 | 3.612529  | -0.703380 |
| 9  | -4.992527 | 3.987921  | 1.868502  |
| 9  | -5.140365 | 1.589584  | 0.967414  |
| 9  | -7.051081 | 2.493704  | 2.556794  |
| 1  | -4.798679 | 0.426820  | 3.348395  |
| 8  | -4.985821 | -0.486202 | 2.991735  |
| 1  | -5.872328 | -0.423240 | 2.539218  |
| 1  | -7.445726 | 0.207230  | 1.013658  |
| 8  | -7.479702 | -0.224188 | 1.886935  |
| 1  | -7.793531 | 0.502469  | 2.451664  |
| 1  | -5.632264 | 2.275442  | 3.951536  |
| 8  | -4.687013 | 2.043218  | 3.978181  |
| 1  | -4.327740 | 2.625517  | 3.286499  |

**HW-TS5**

|    |           |           |           |
|----|-----------|-----------|-----------|
| 6  | -2.384131 | -0.004254 | 0.487785  |
| 6  | -1.267000 | 0.609353  | 0.177152  |
| 14 | -0.137259 | 0.082103  | -1.249144 |
| 1  | 0.735897  | -1.019930 | -0.771048 |
| 1  | -0.934934 | -0.377545 | -2.414806 |
| 1  | 0.704040  | 1.237895  | -1.643619 |
| 6  | -3.468080 | -0.650792 | 0.904741  |
| 1  | -0.624674 | 1.079316  | 1.262853  |
| 6  | -3.367176 | -1.804234 | 1.794435  |
| 1  | -4.333715 | -2.301239 | 1.993379  |
| 8  | -2.344871 | -2.245798 | 2.316509  |
| 79 | -2.281023 | 2.550483  | -0.171382 |
| 15 | -3.141241 | 4.634811  | -0.746228 |
| 1  | -4.017474 | 4.637749  | -1.841593 |
| 1  | -3.890600 | 5.263024  | 0.258063  |
| 1  | -2.225366 | 5.635427  | -1.126772 |
| 51 | -5.814207 | 2.752468  | 1.687328  |
| 9  | -5.086574 | 4.462814  | 1.939380  |
| 9  | -7.474270 | 3.420786  | 1.243104  |
| 9  | -5.261456 | 2.893472  | -0.121953 |
| 9  | -4.048529 | 2.112336  | 2.095847  |
| 9  | -6.272625 | 0.981646  | 1.334114  |
| 9  | -6.220889 | 2.602529  | 3.482209  |
| 8  | 0.006529  | 1.391448  | 2.338200  |
| 1  | -0.640382 | 1.972267  | 2.839664  |
| 1  | -2.767936 | 2.595079  | 3.134996  |
| 8  | -1.905800 | 2.809784  | 3.554589  |
| 1  | -1.874131 | 3.776449  | 3.603949  |
| 1  | -4.459436 | -0.284652 | 0.649932  |
| 1  | 0.051601  | 0.510730  | 2.829198  |
| 1  | -0.820353 | -1.492731 | 2.900236  |
| 8  | -0.089661 | -1.037029 | 3.380696  |
| 1  | -0.328095 | -1.111672 | 4.317167  |

**HW-TS6**

|    |           |           |           |
|----|-----------|-----------|-----------|
| 6  | -1.594789 | 0.005009  | 2.609792  |
| 6  | -0.274358 | 0.338741  | 2.598467  |
| 1  | 0.556426  | -0.332511 | 2.435896  |
| 1  | -2.045735 | 3.153300  | 3.012619  |
| 6  | -0.199328 | 1.768701  | 2.809139  |
| 6  | -1.537193 | 2.161667  | 3.010678  |
| 79 | 1.410314  | 3.000277  | 2.451278  |
| 1  | -2.118526 | -0.930532 | 2.470411  |
| 8  | -2.377766 | 1.077487  | 2.863732  |
| 14 | -0.680158 | 2.300389  | 4.976465  |
| 1  | -0.624877 | 3.762196  | 5.155282  |
| 1  | -1.840961 | 1.652220  | 5.632724  |
| 1  | 0.554169  | 1.640793  | 5.455499  |
| 15 | 3.301617  | 4.332536  | 1.940473  |
| 1  | 3.934589  | 4.090091  | 0.711088  |
| 1  | 3.095525  | 5.718567  | 1.889713  |
| 1  | 4.409504  | 4.260898  | 2.810679  |
| 8  | -3.138432 | 4.540043  | 3.316093  |
| 1  | -3.561321 | 4.642198  | 2.431916  |
| 1  | -2.675376 | 5.399195  | 3.456755  |
| 1  | -2.029063 | 7.312006  | 2.529204  |
| 8  | -1.713512 | 6.949180  | 3.373749  |
| 1  | -0.843341 | 6.595893  | 3.112941  |
| 51 | -0.084148 | 5.760972  | 0.080796  |
| 9  | 0.874099  | 7.306907  | -0.244623 |
| 9  | 1.456563  | 4.714945  | -0.187485 |
| 9  | 0.416915  | 5.891729  | 1.911648  |
| 9  | -0.617929 | 5.573532  | -1.673856 |
| 9  | -1.636331 | 6.749350  | 0.506876  |
| 9  | -1.026806 | 4.190784  | 0.540086  |
| 1  | -3.454836 | 5.740358  | 0.458240  |
| 8  | -3.775066 | 4.834151  | 0.605604  |
| 1  | -2.976499 | 4.315983  | 0.400133  |

## Spectral Charts

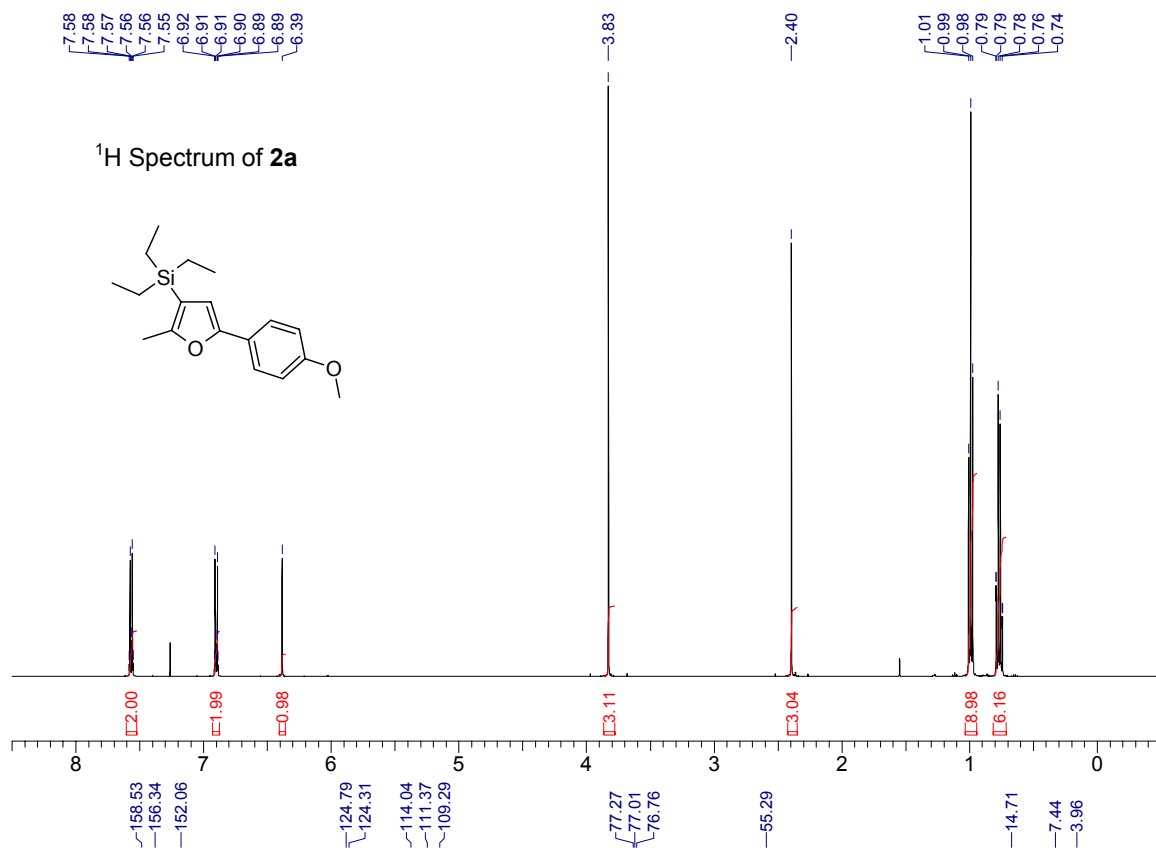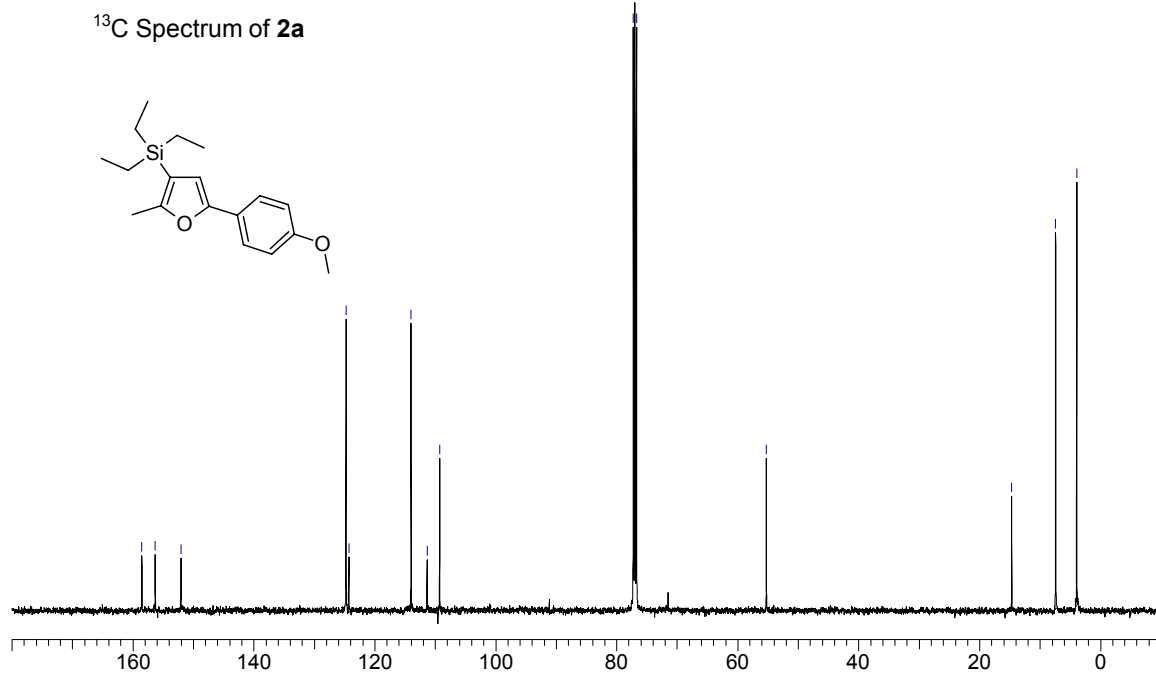

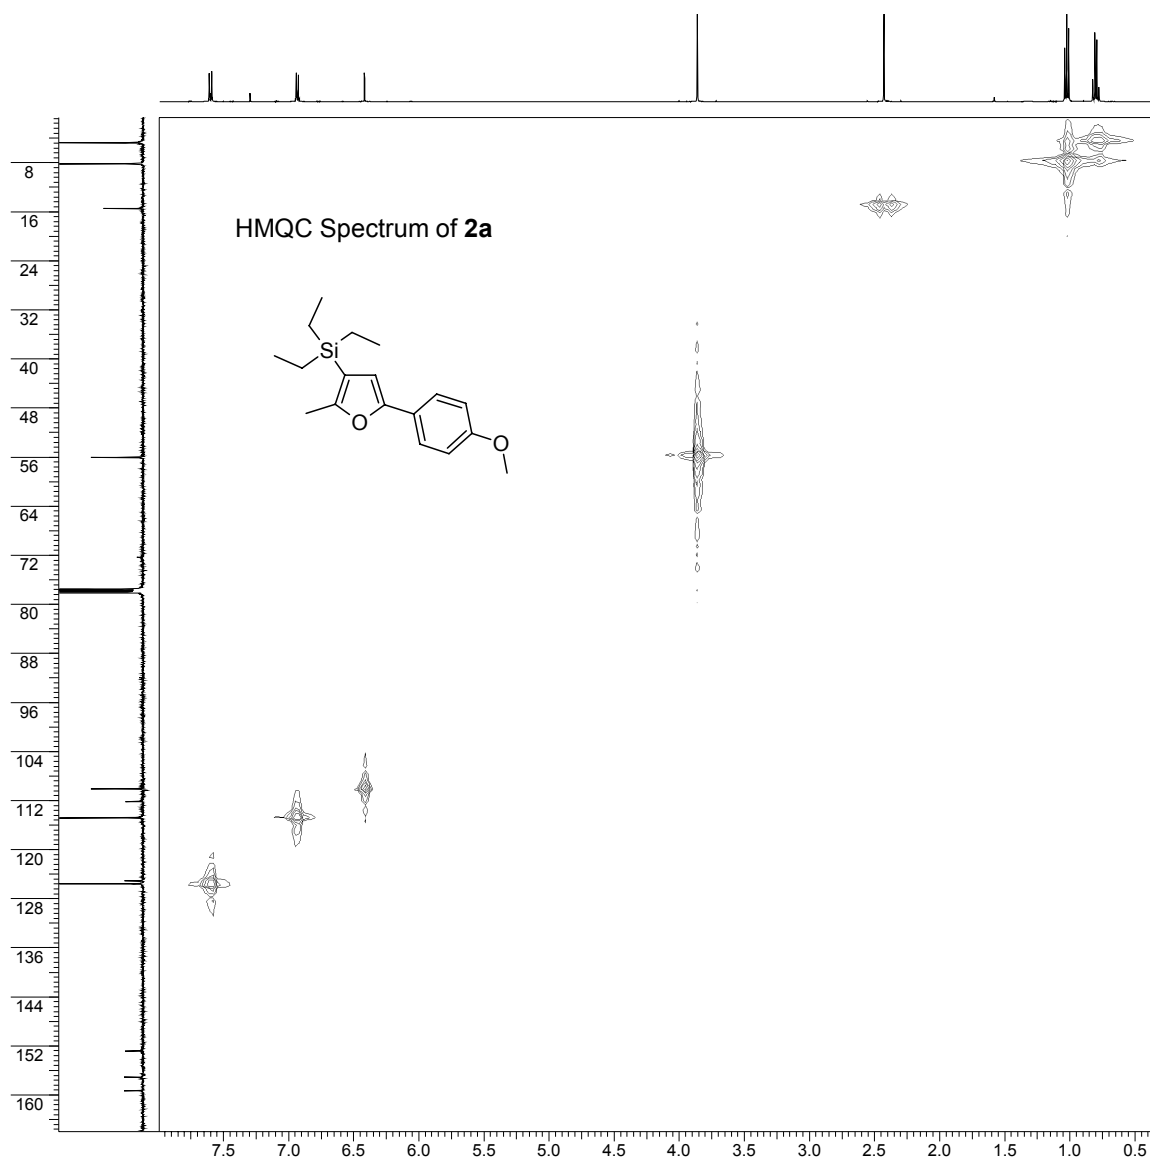



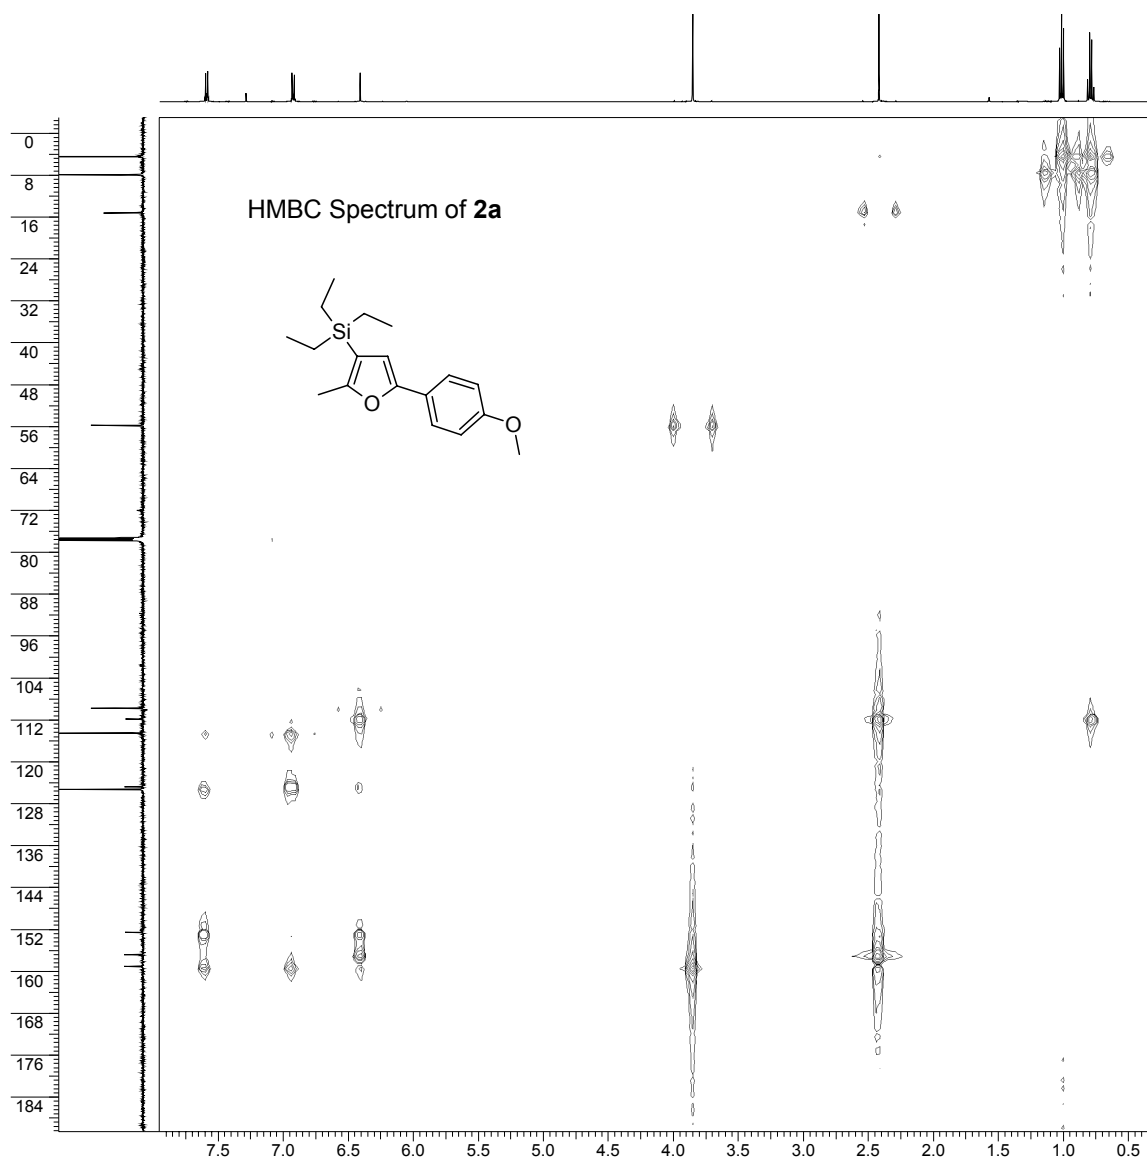

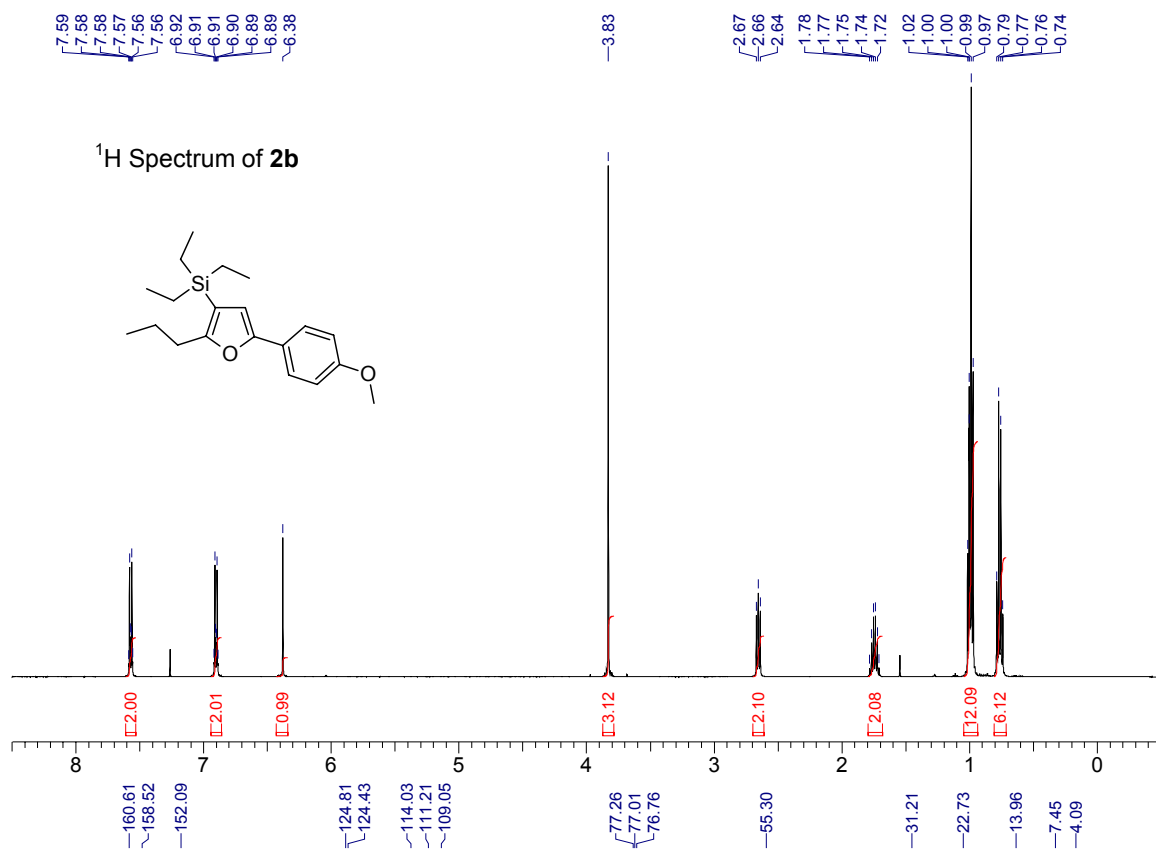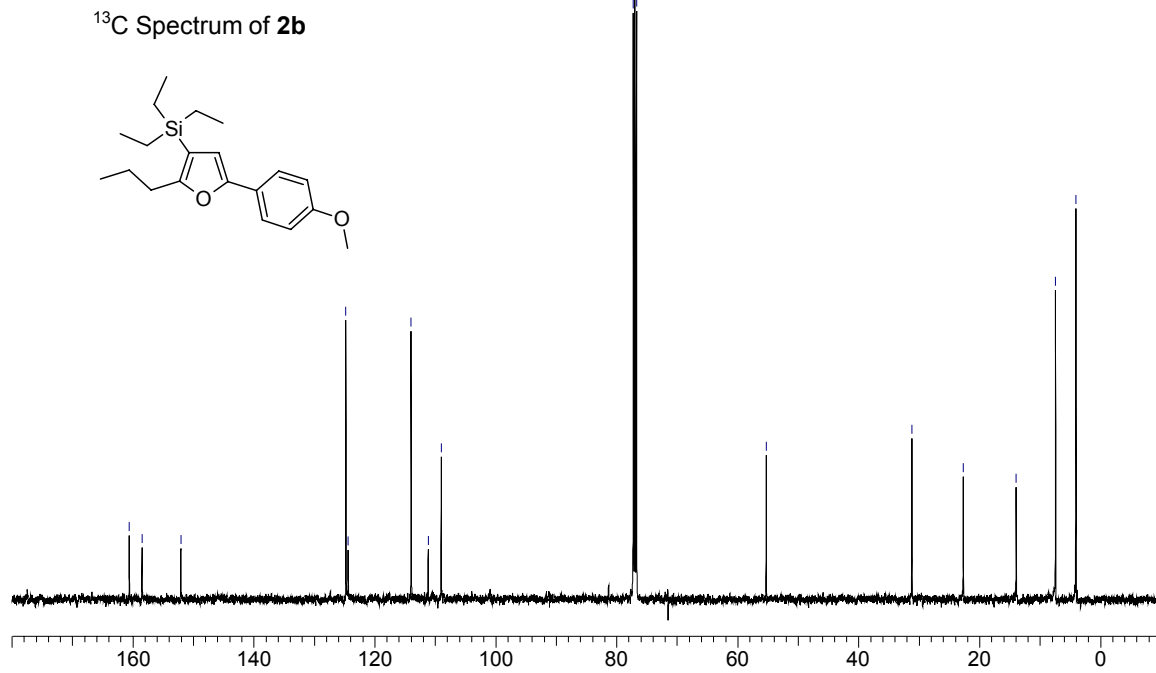

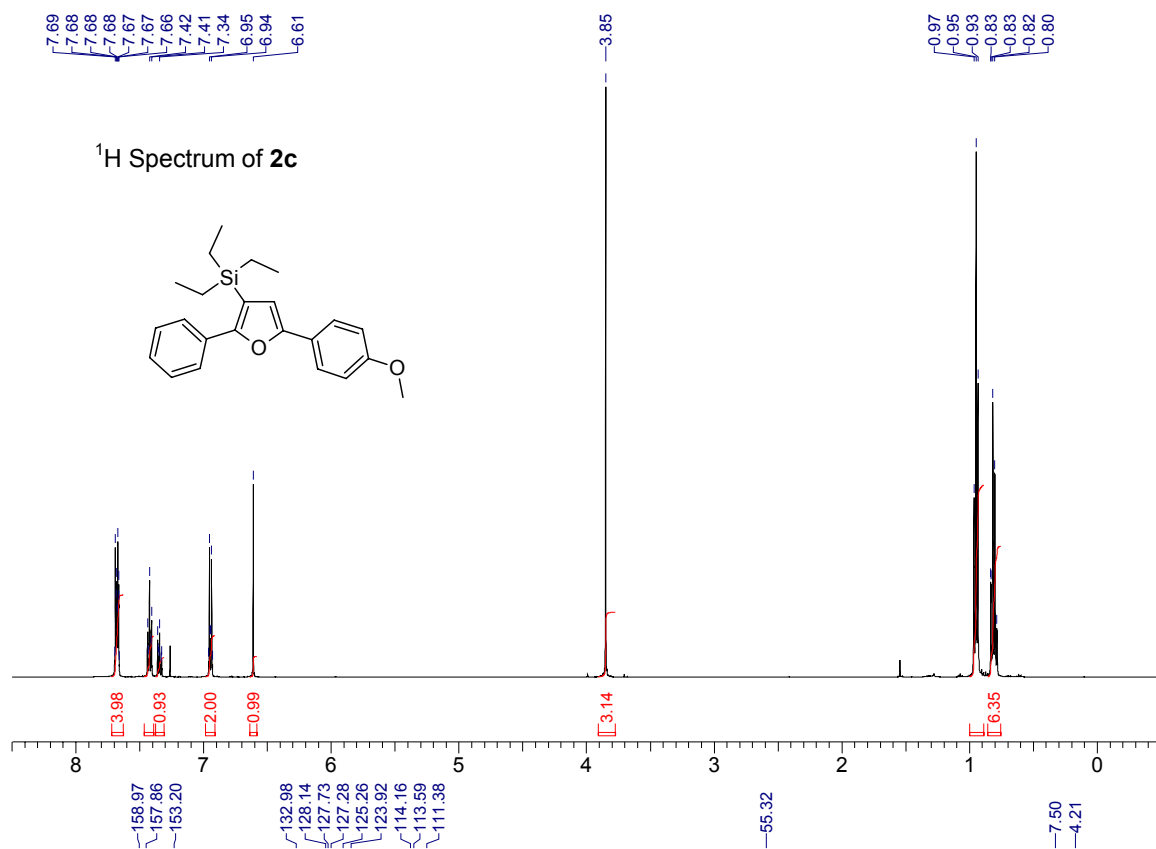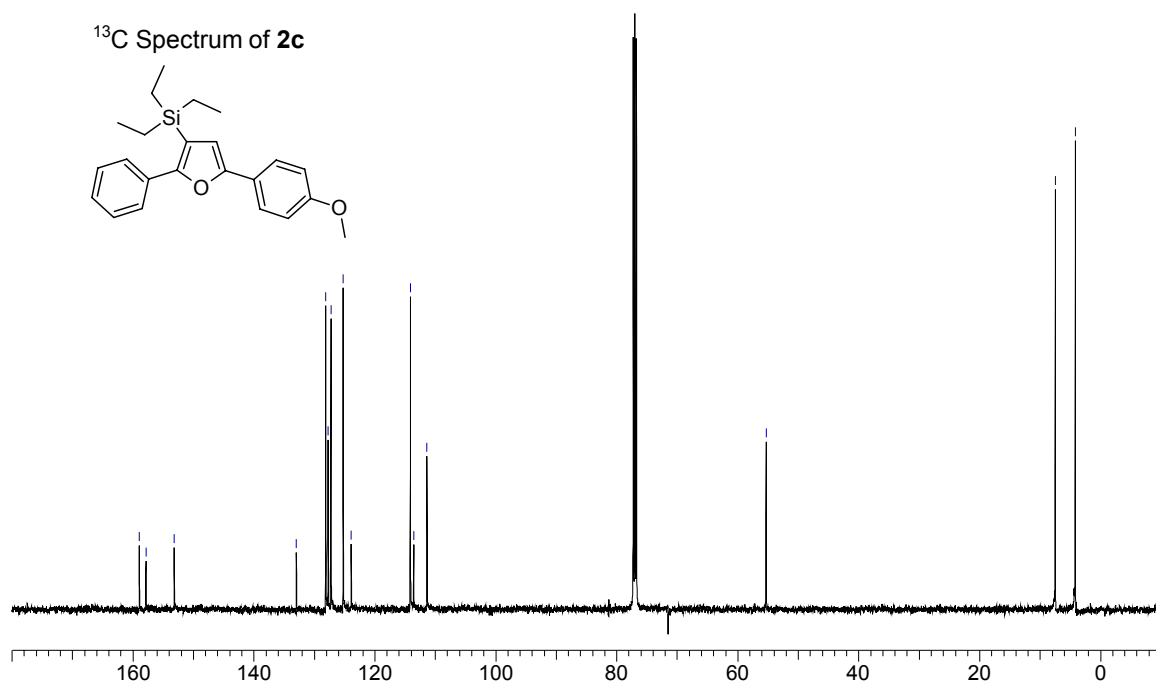

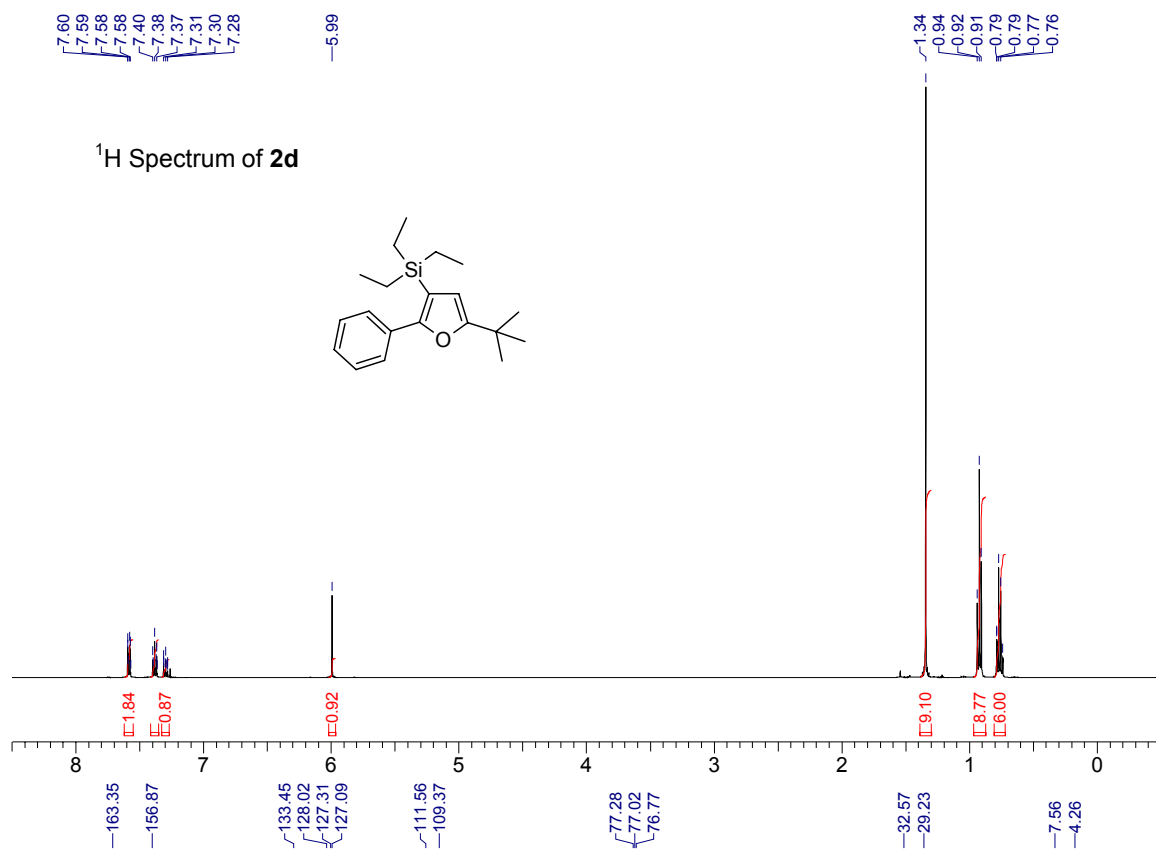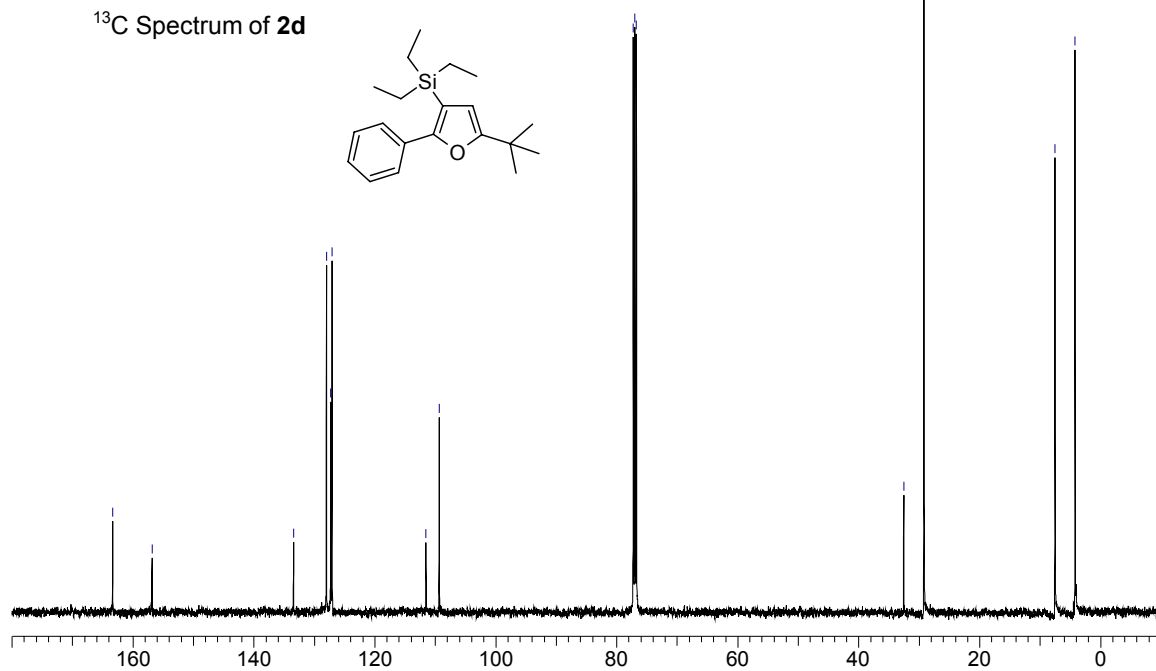

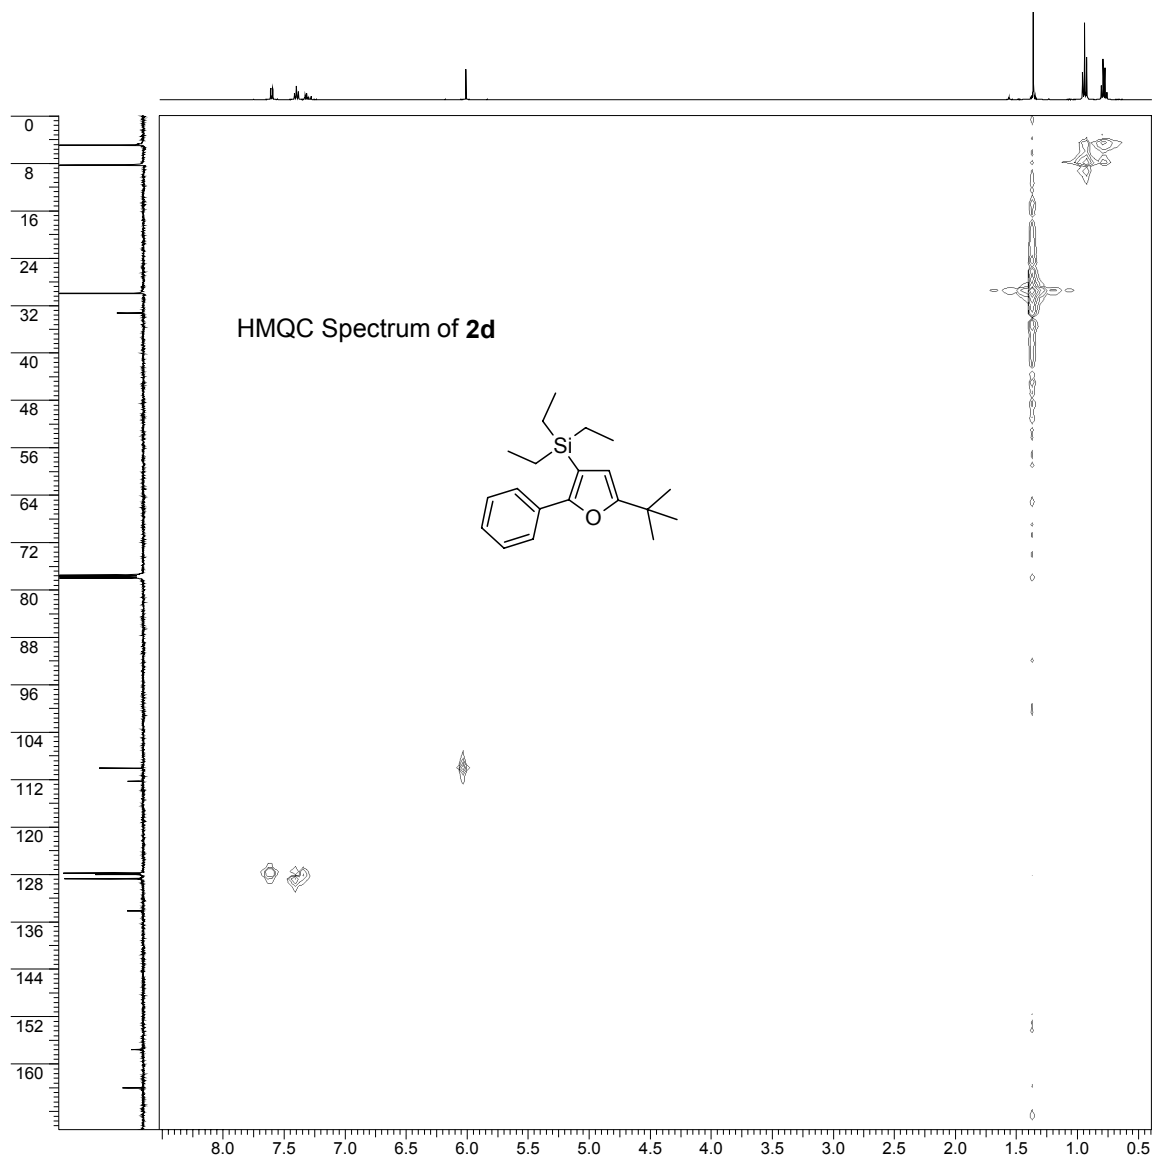

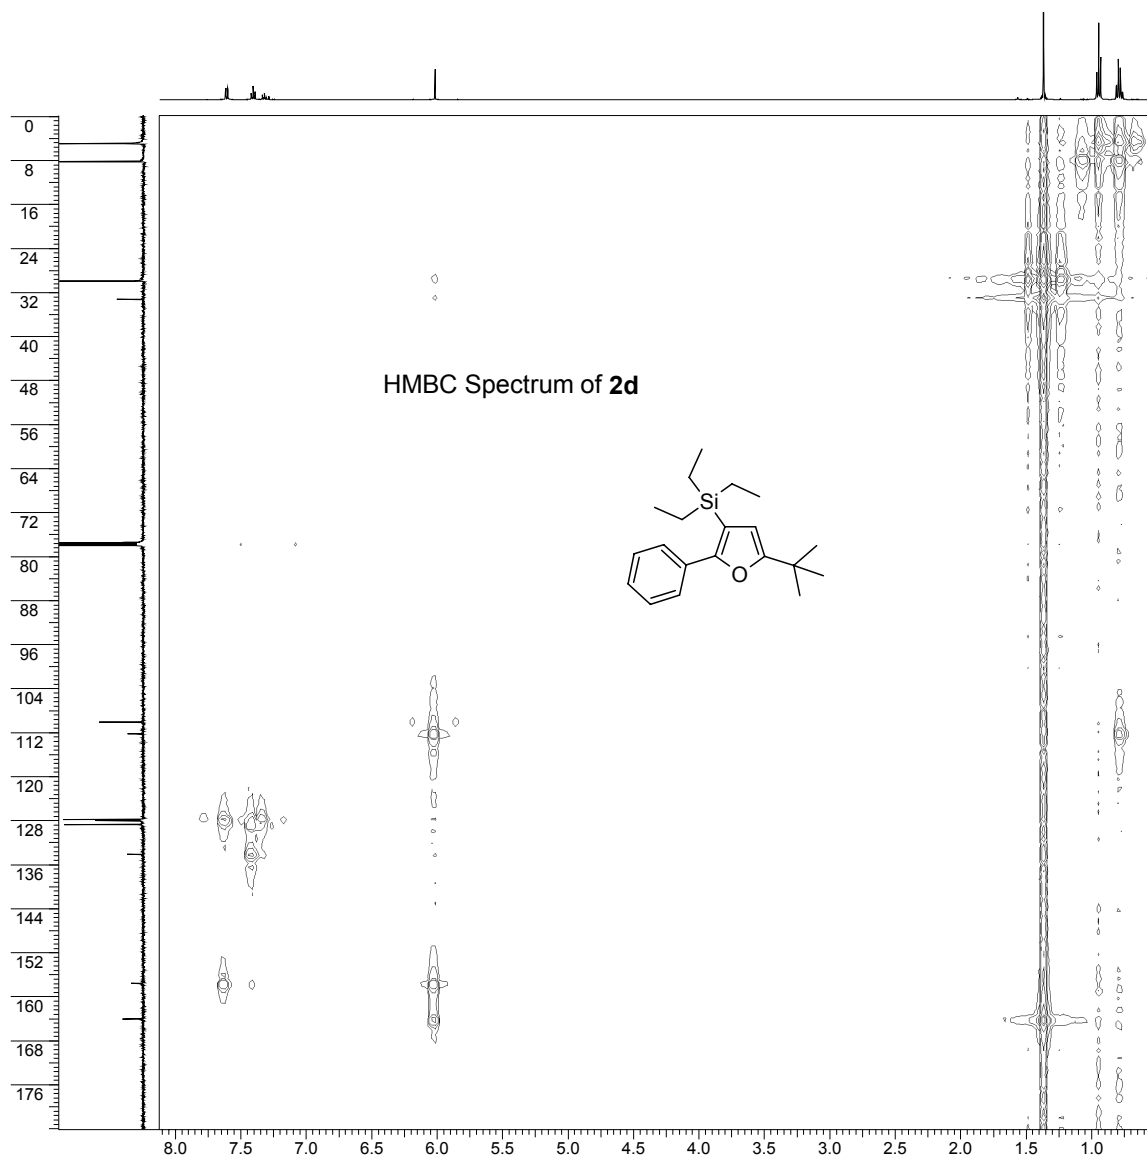

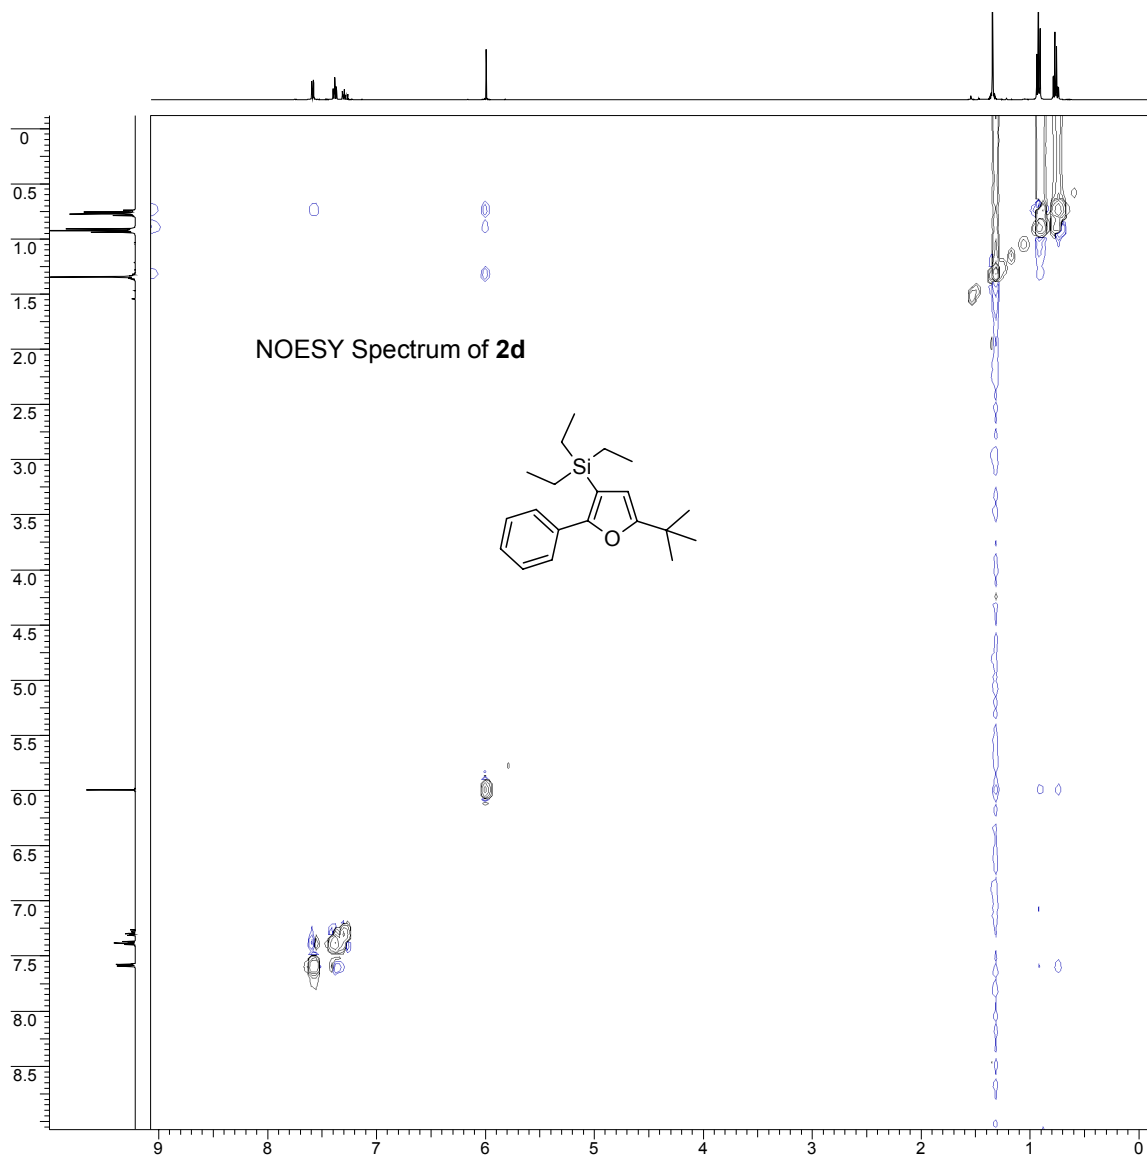

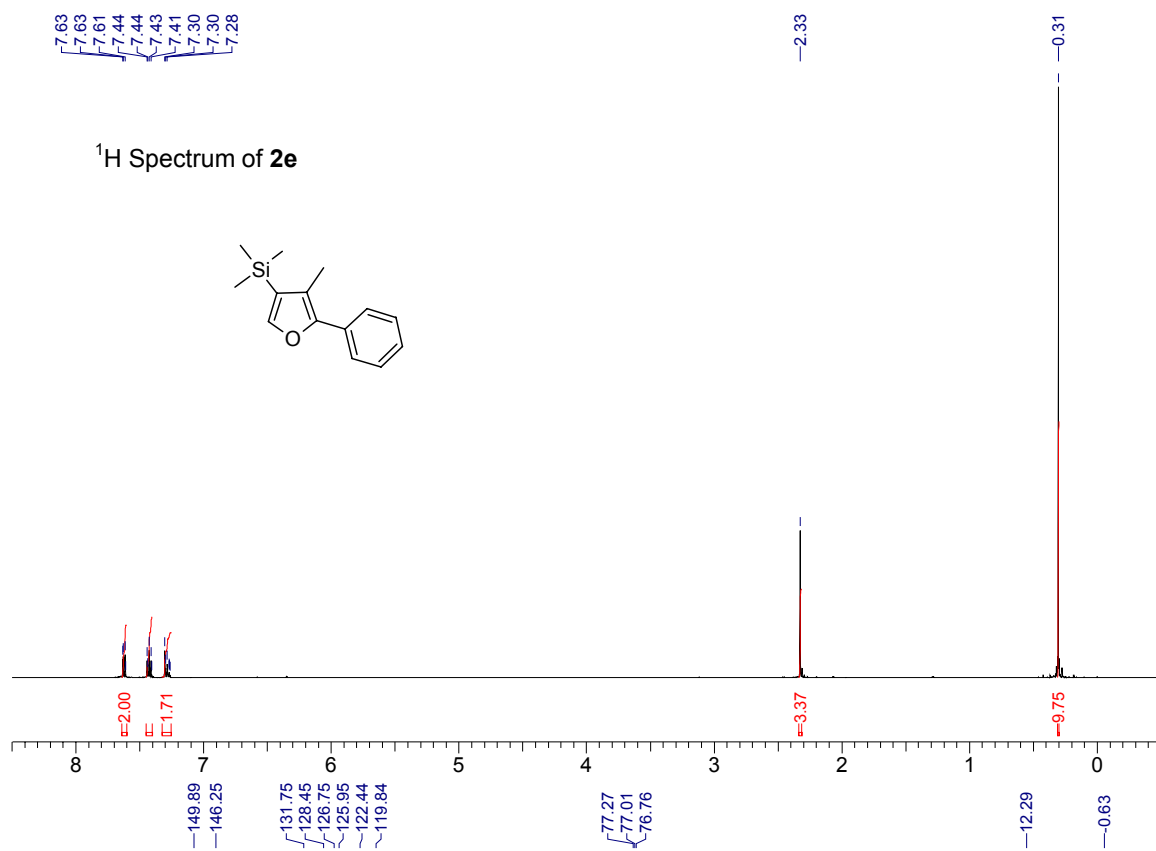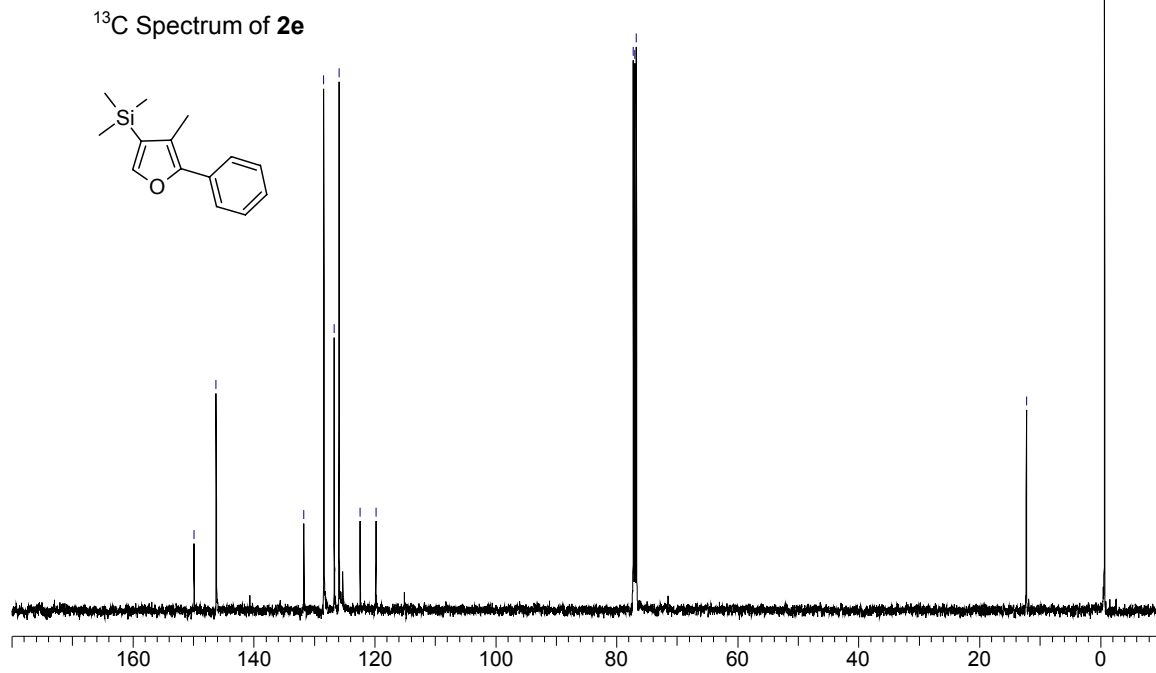



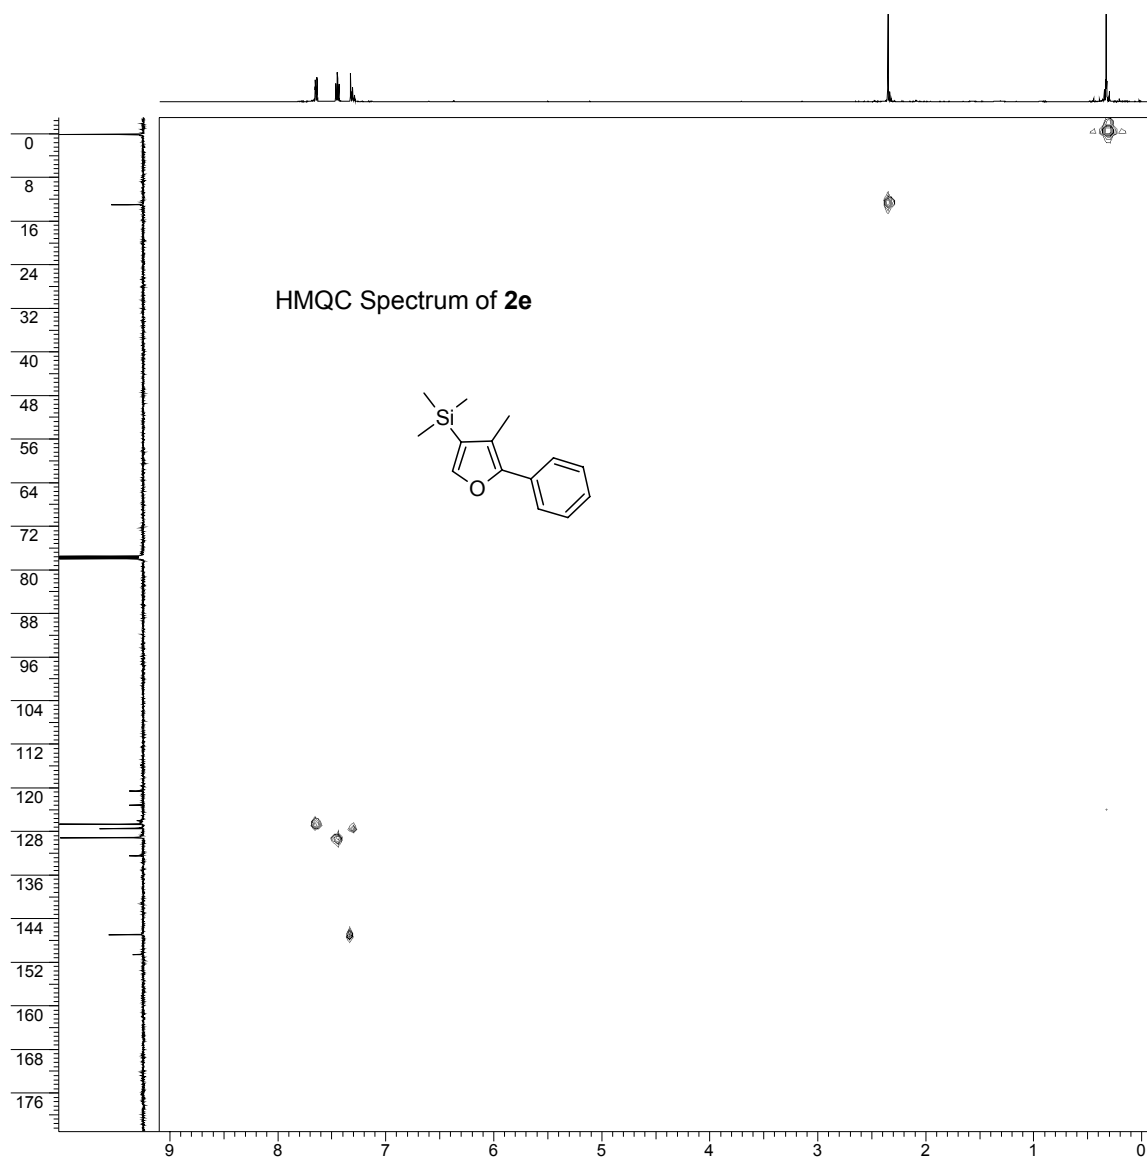

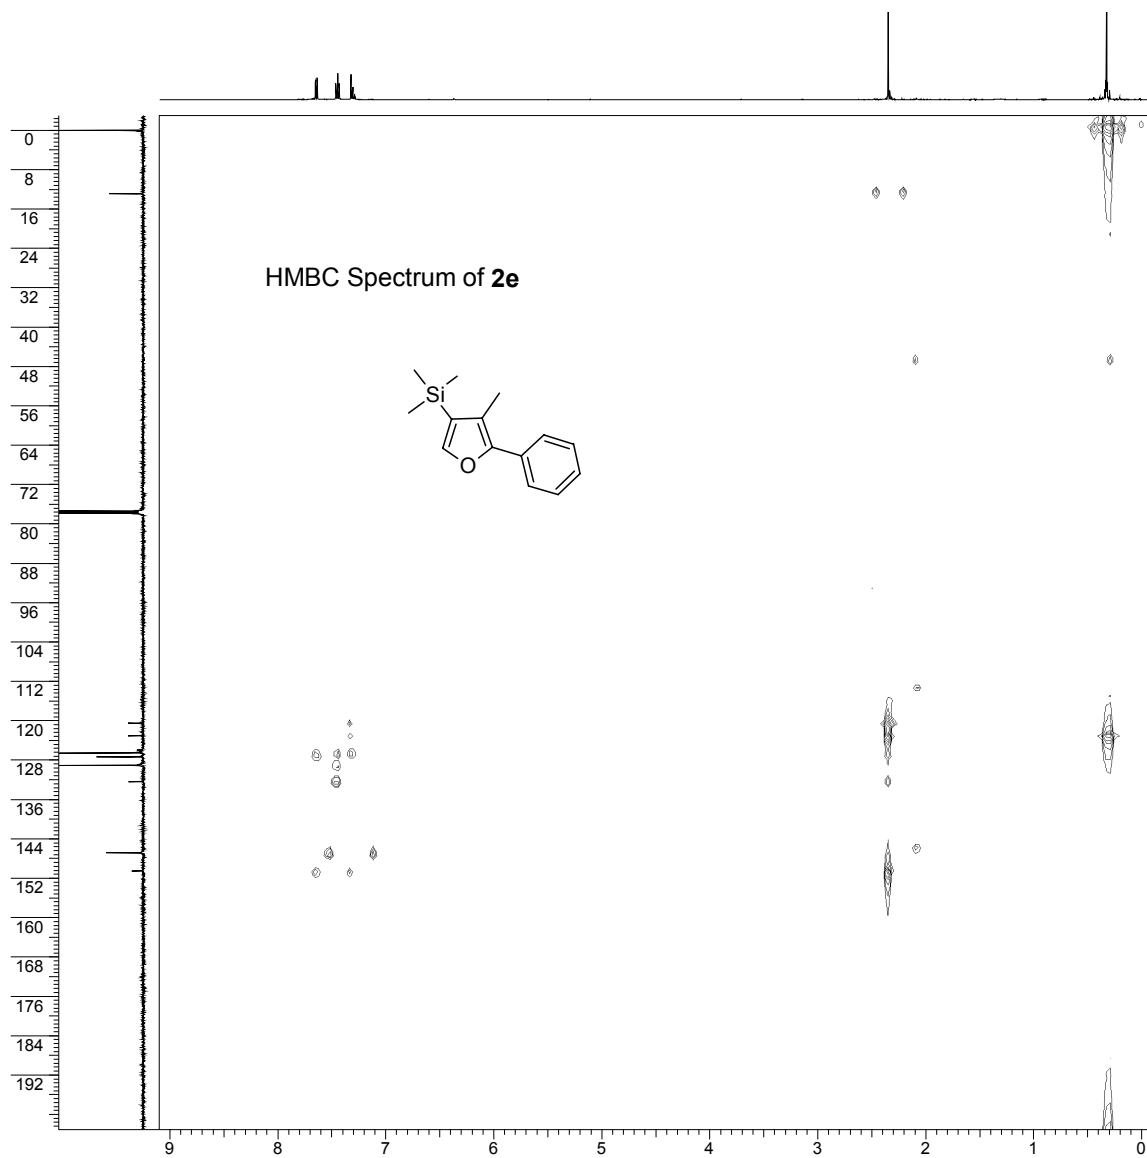

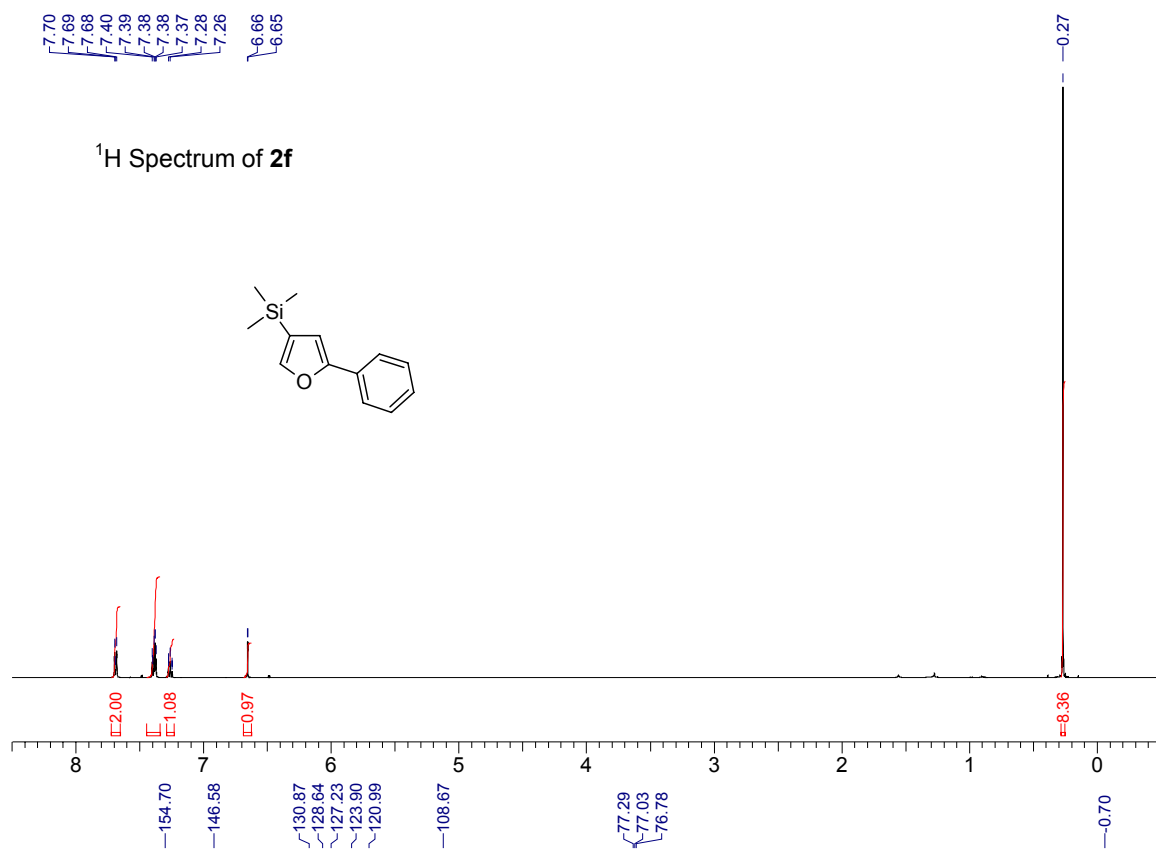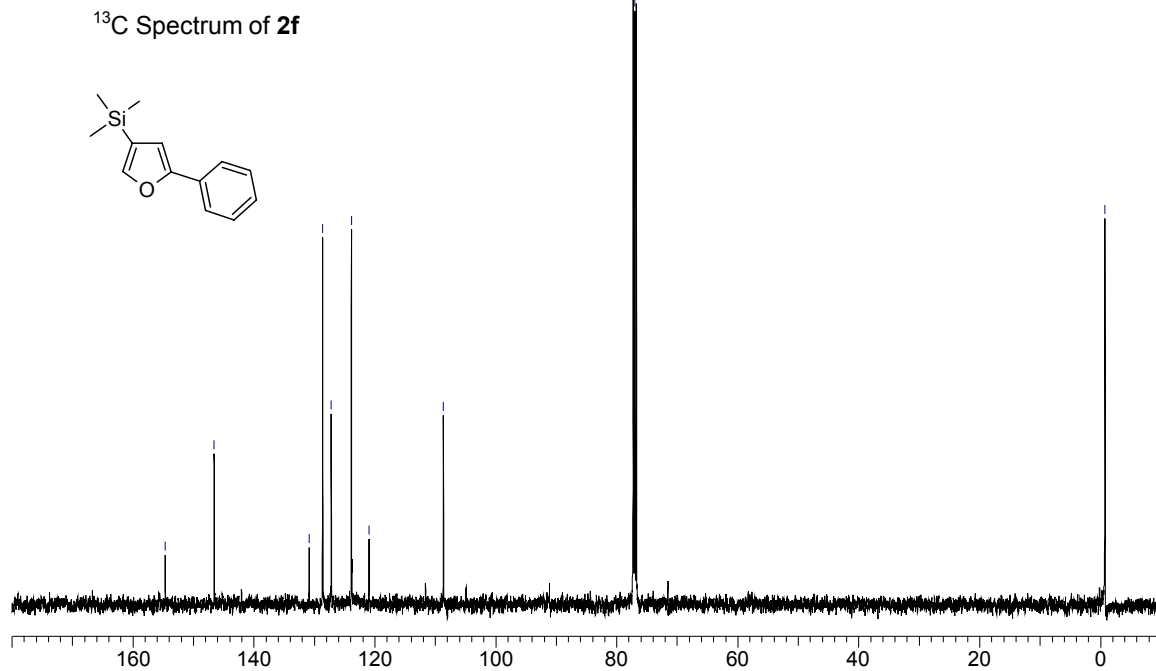

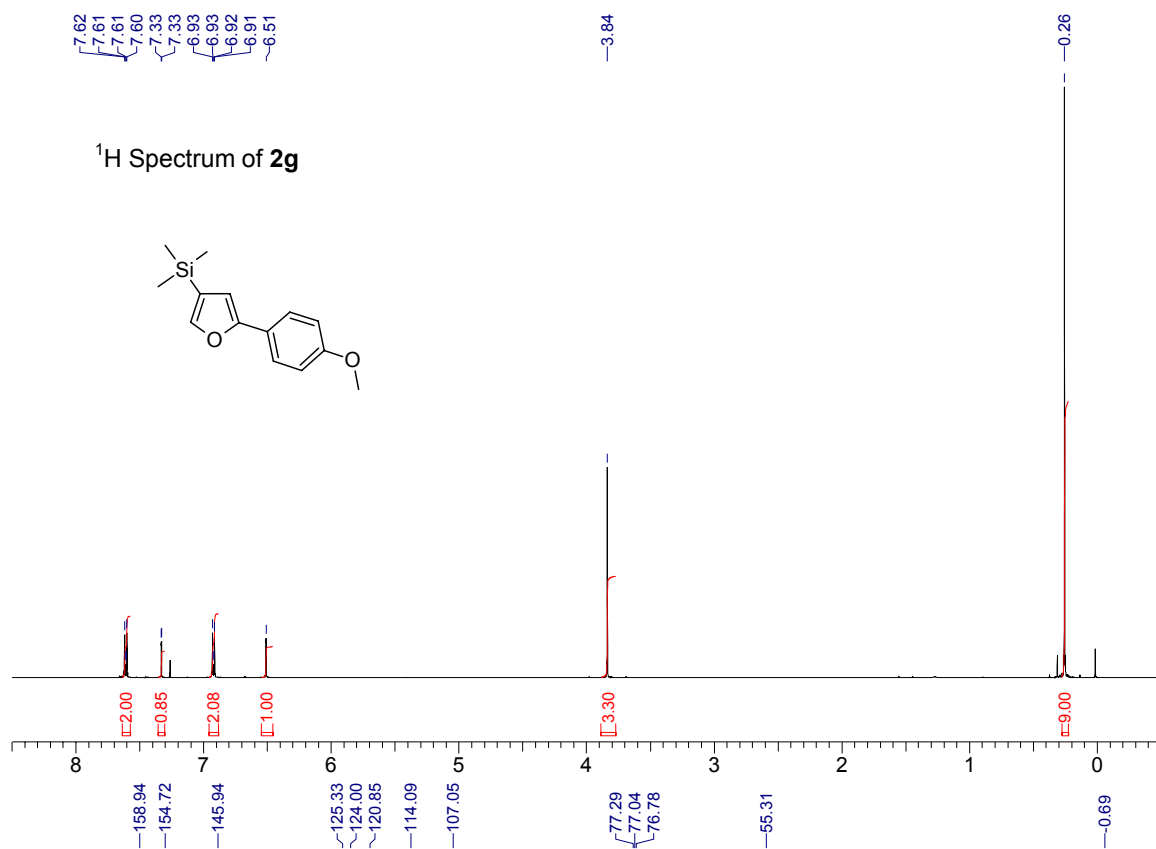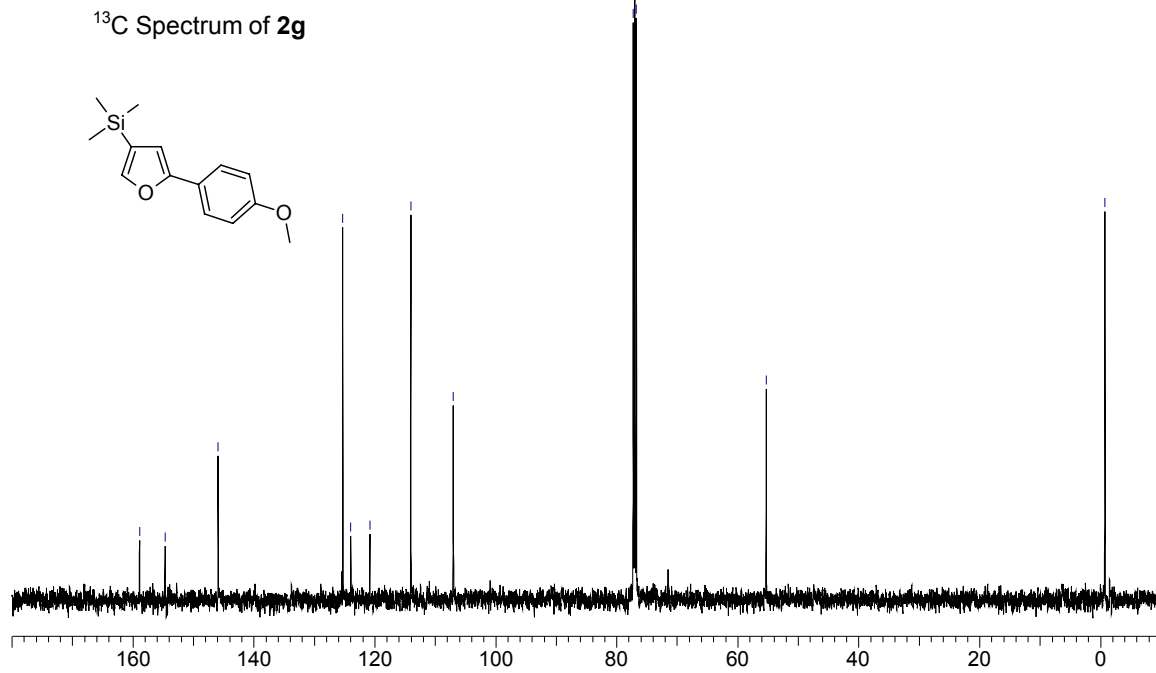

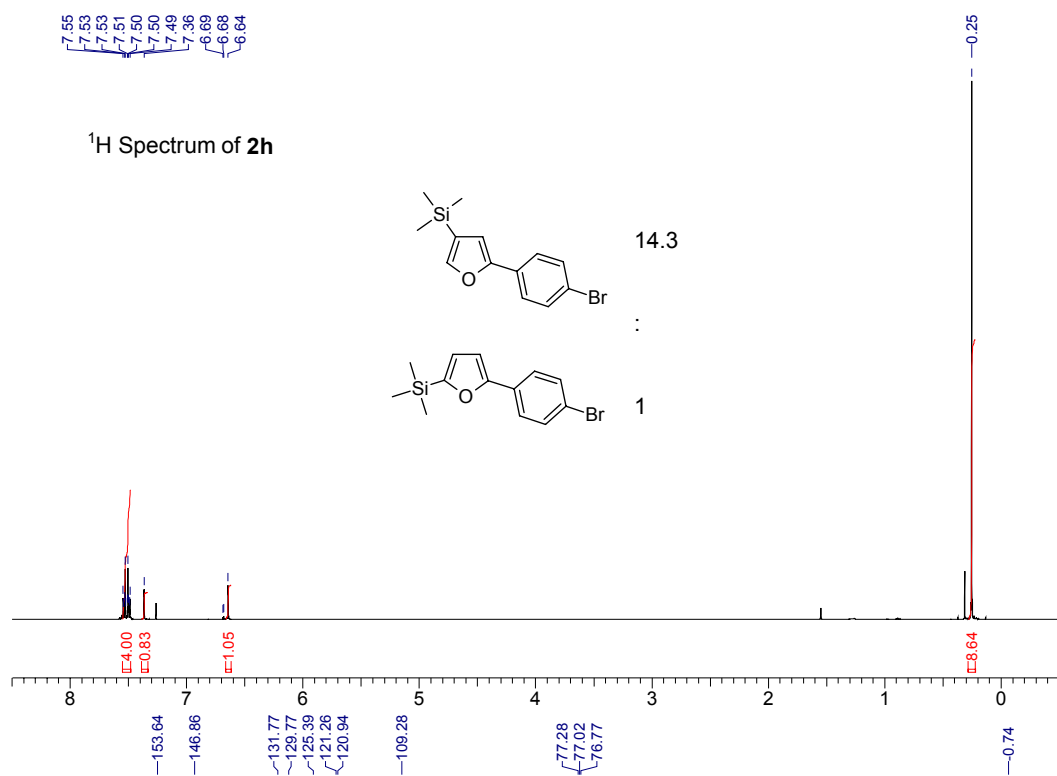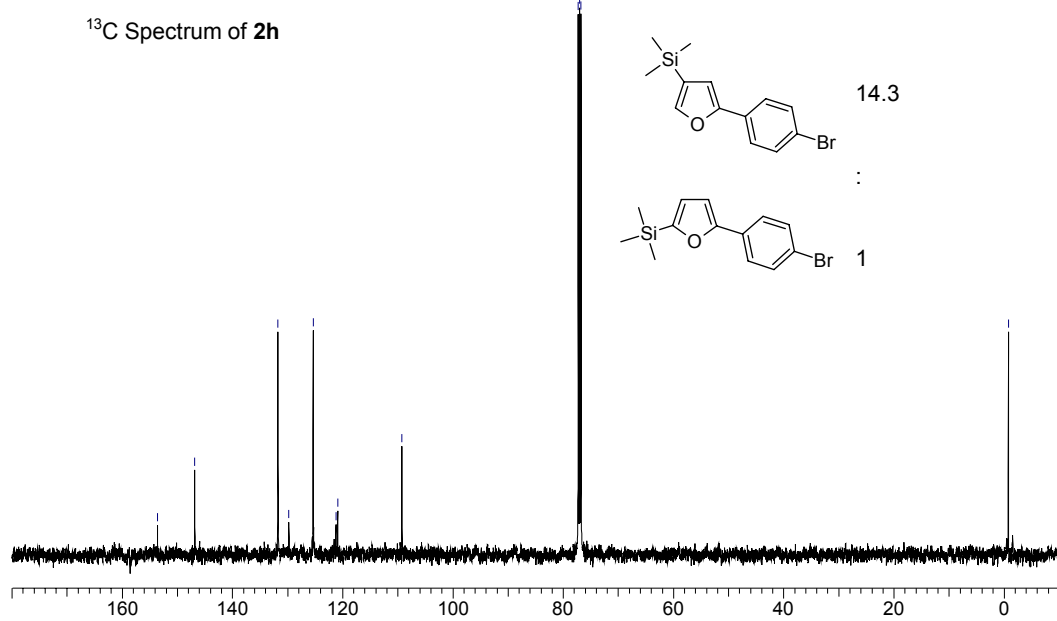

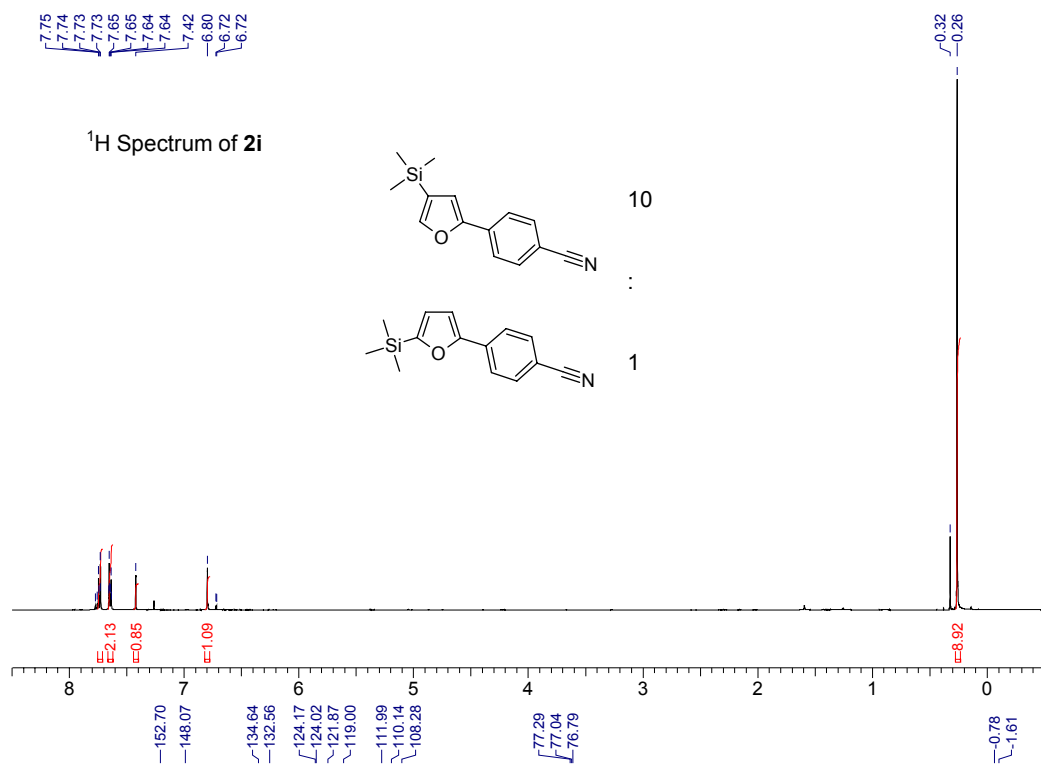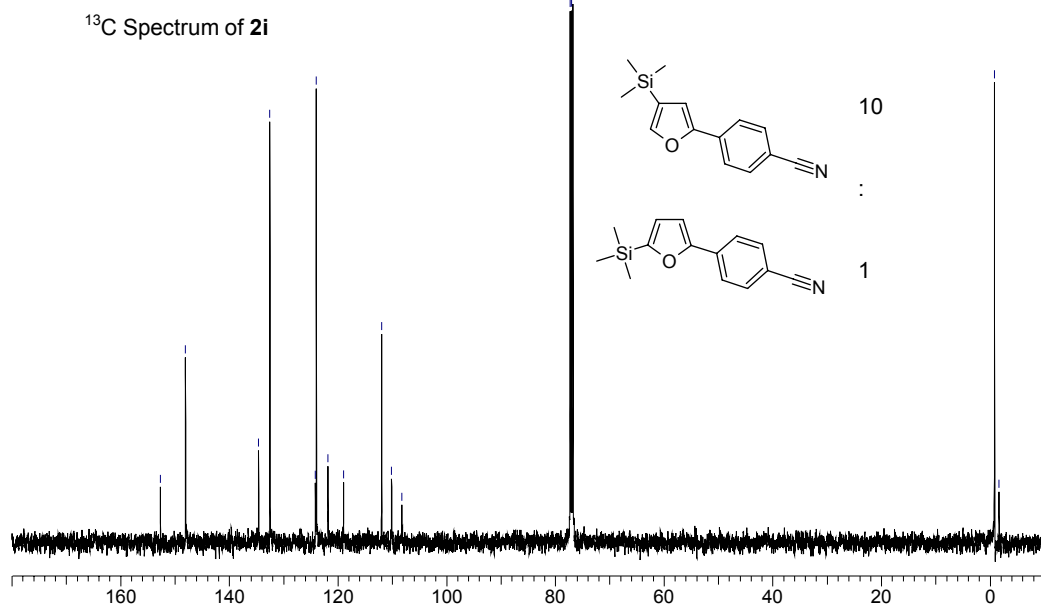

8.50  
8.49  
8.49  
8.07  
7.97  
7.95  
7.56  
7.54  
7.53  
7.42  
7.26  
6.80  
6.79  
6.73

<sup>1</sup>H Spectrum of 2j

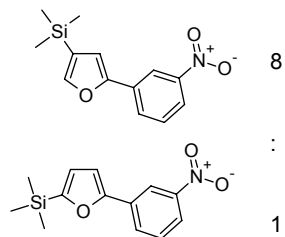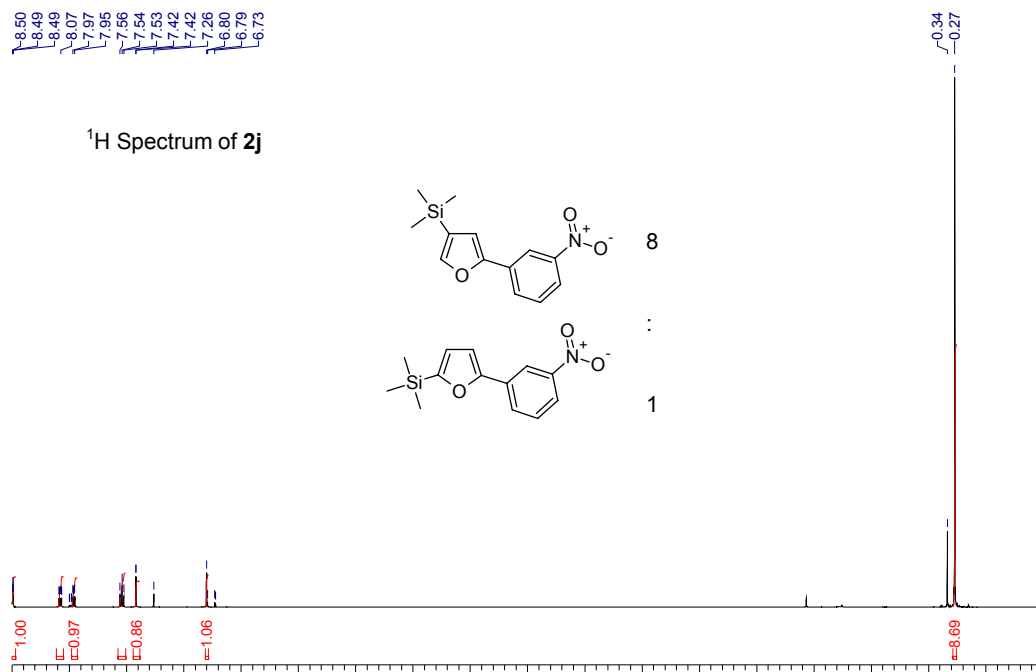

<sup>13</sup>C Spectrum of 2j

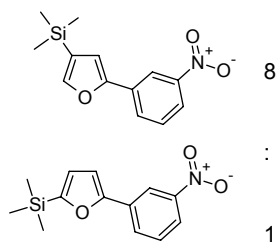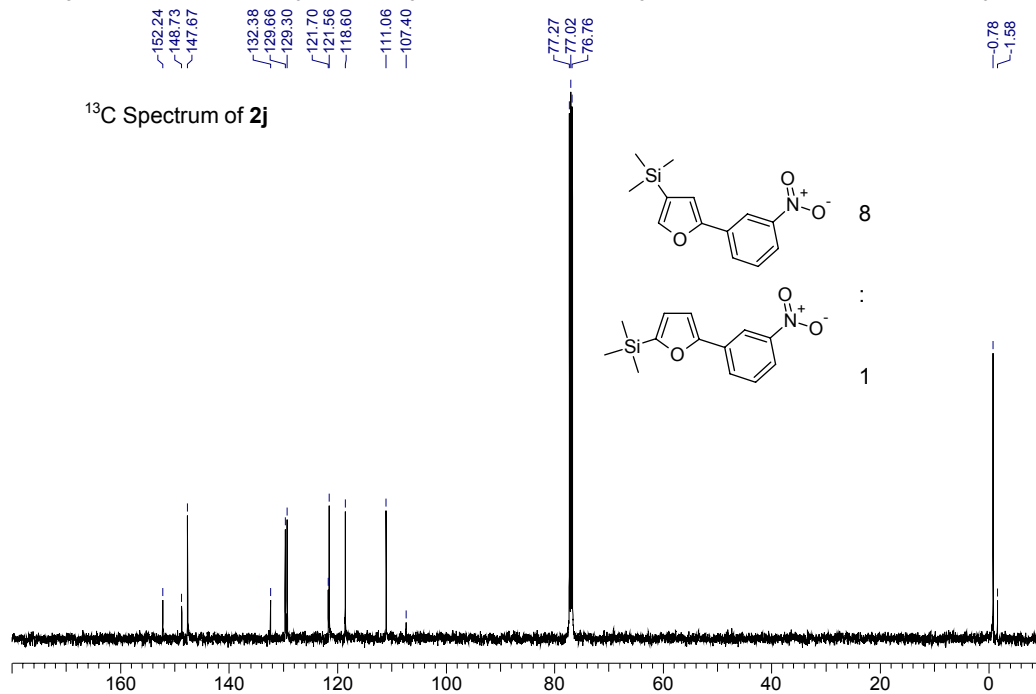

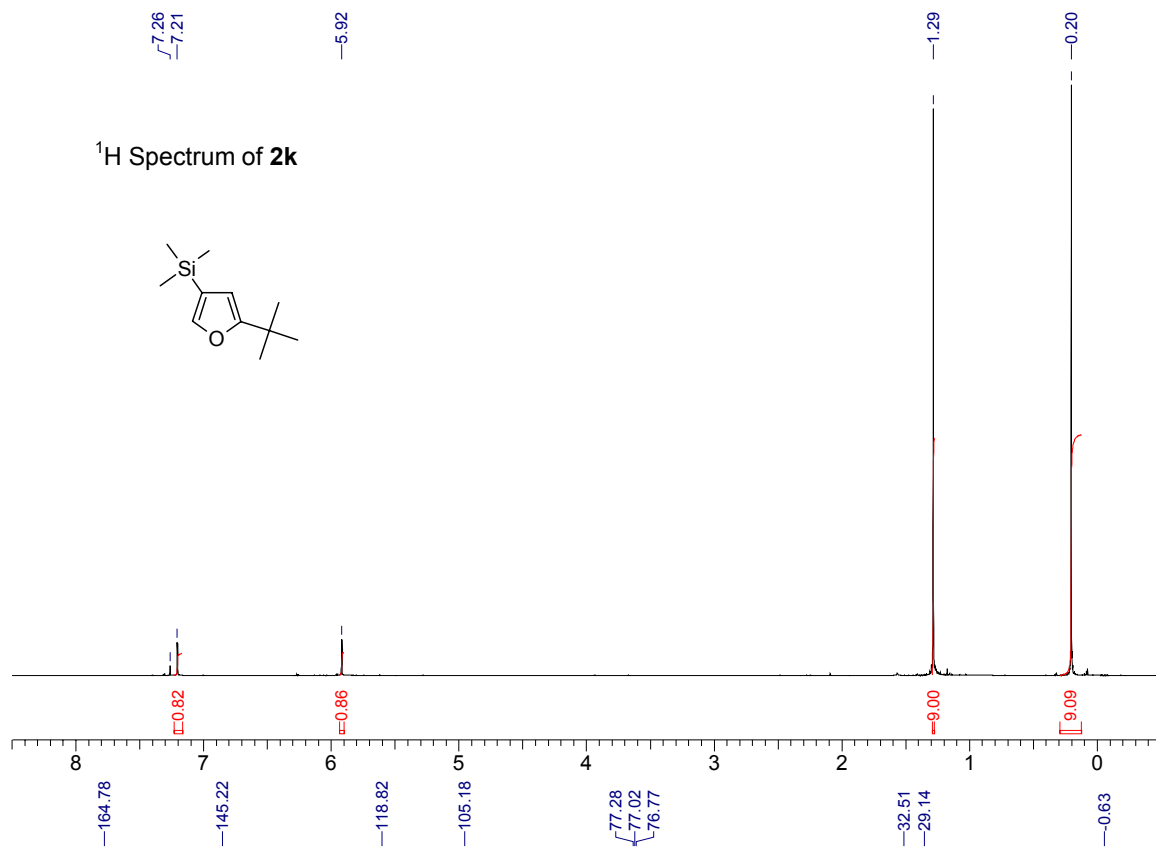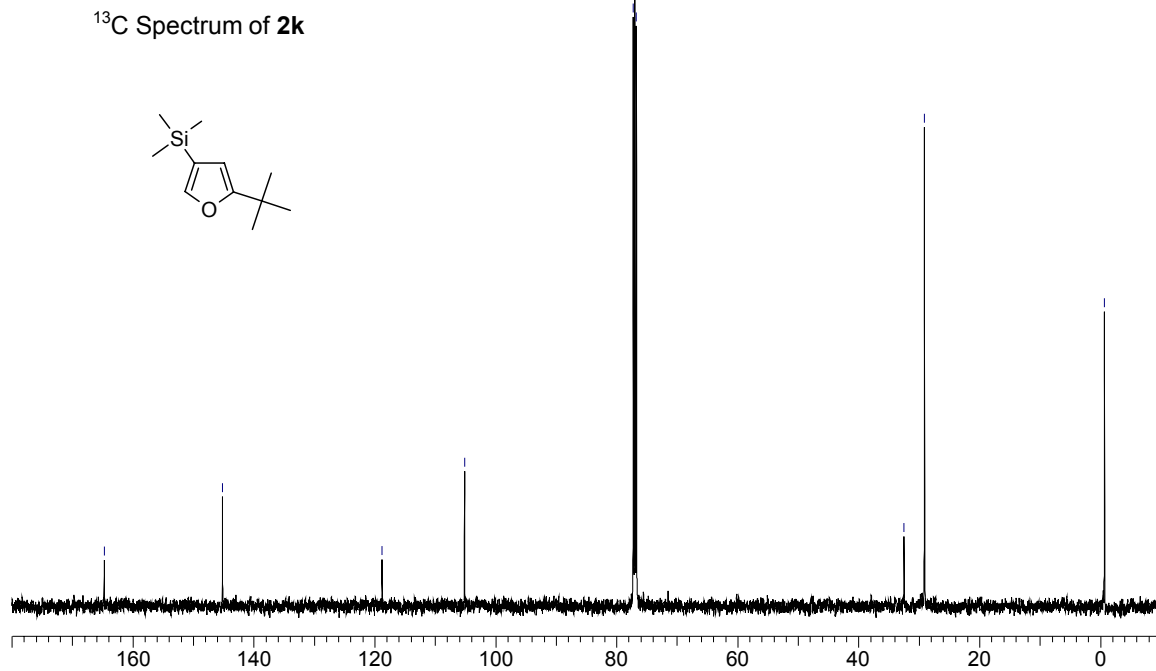



<sup>1</sup>H Spectrum of **21**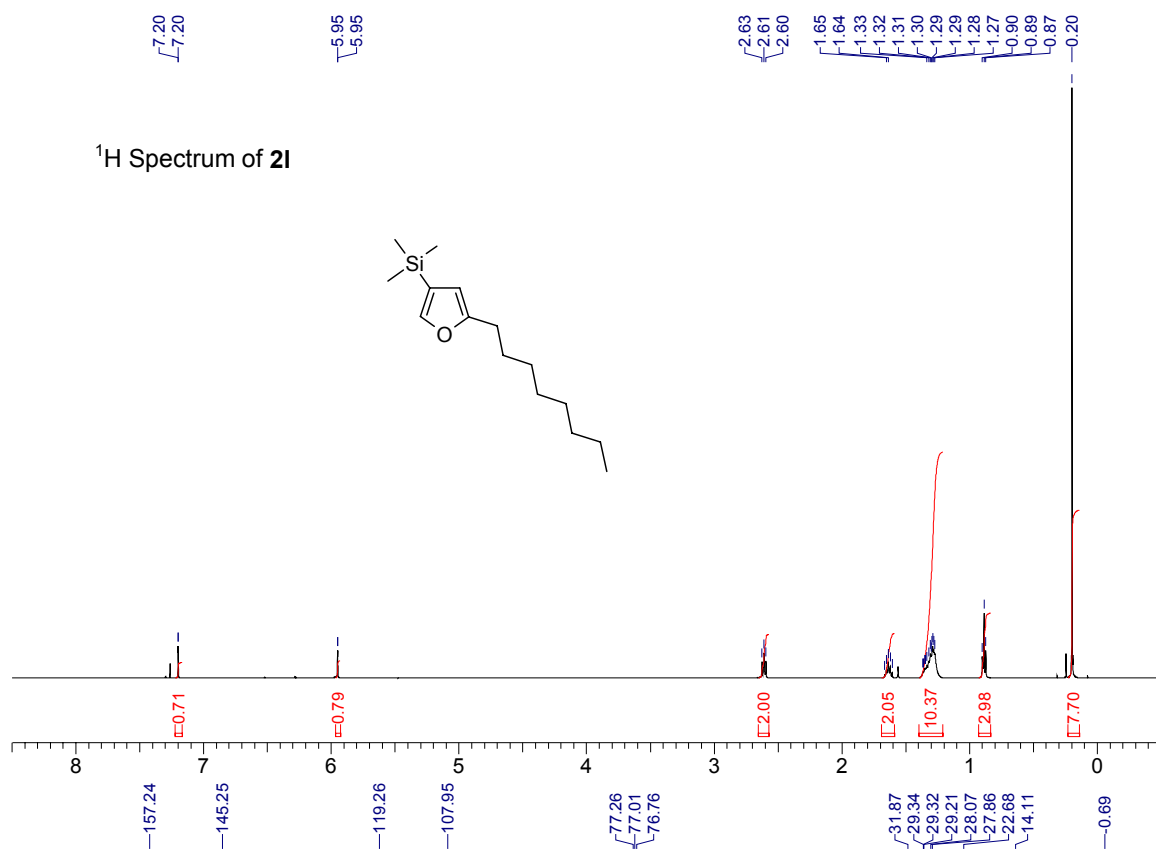<sup>13</sup>C Spectrum of **21**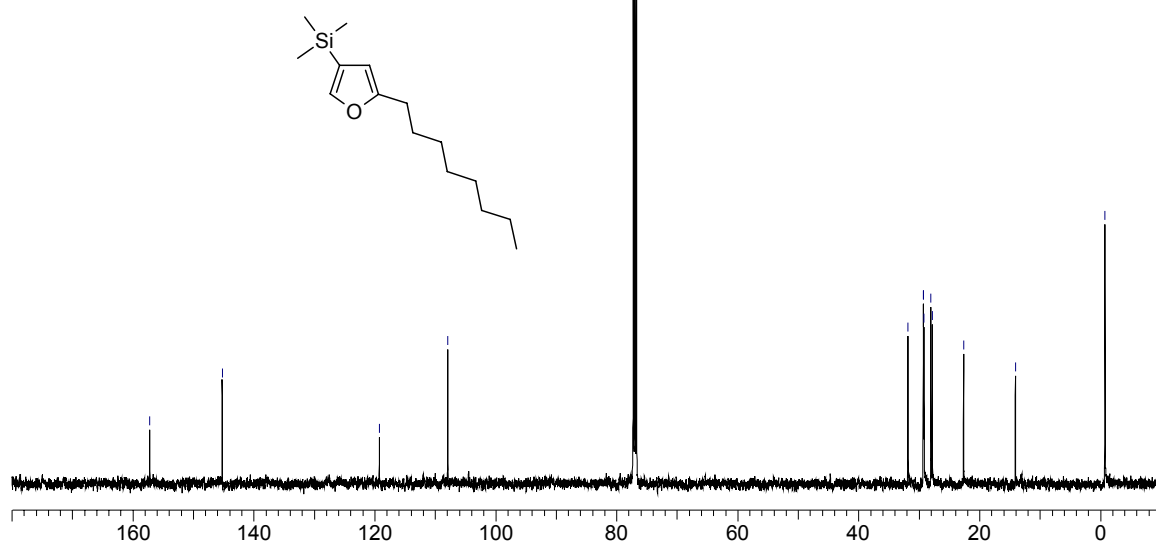

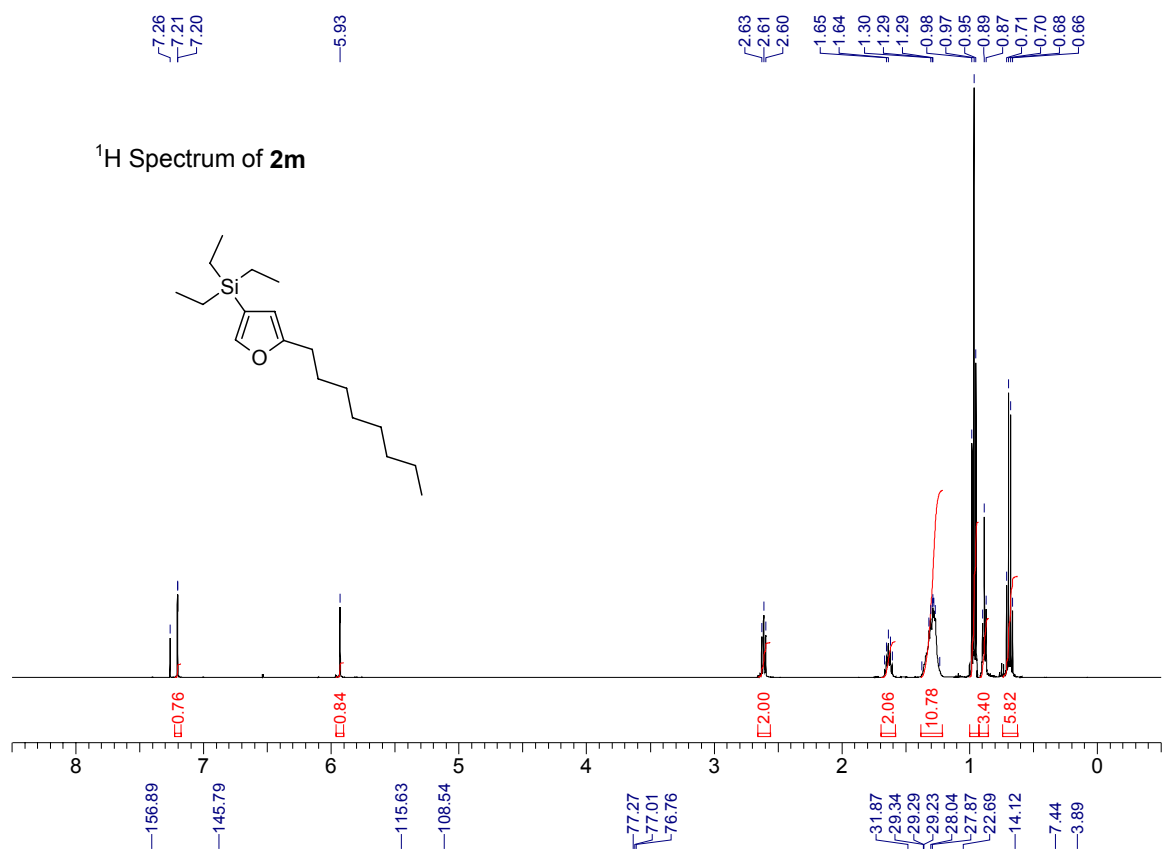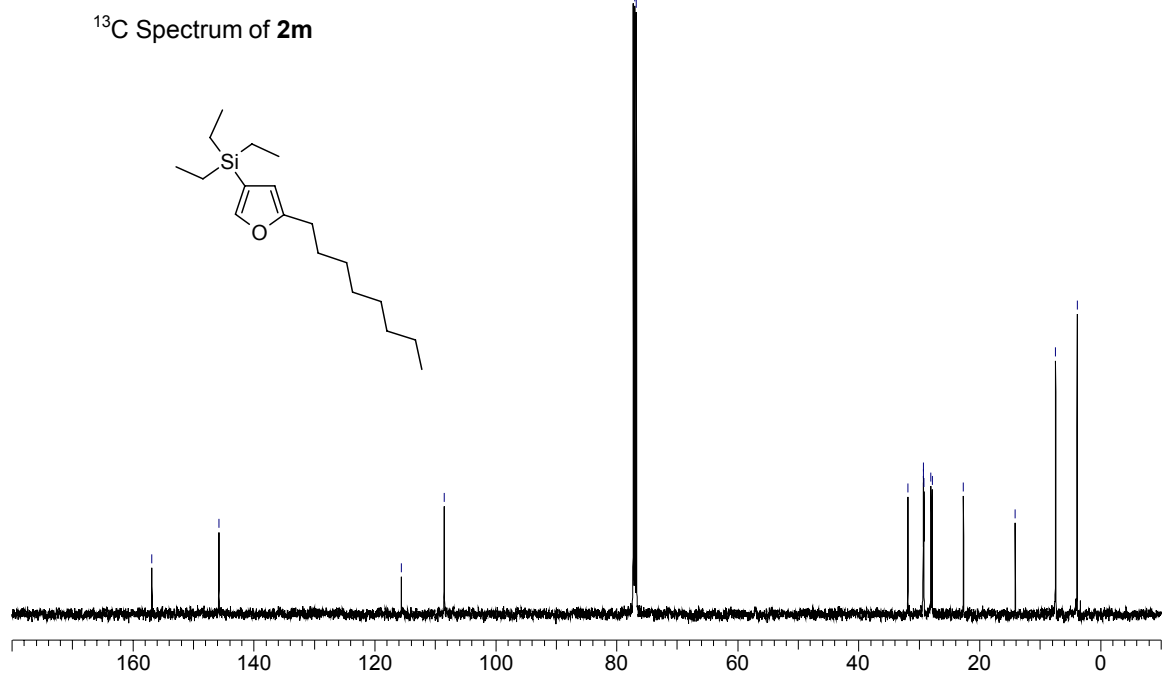

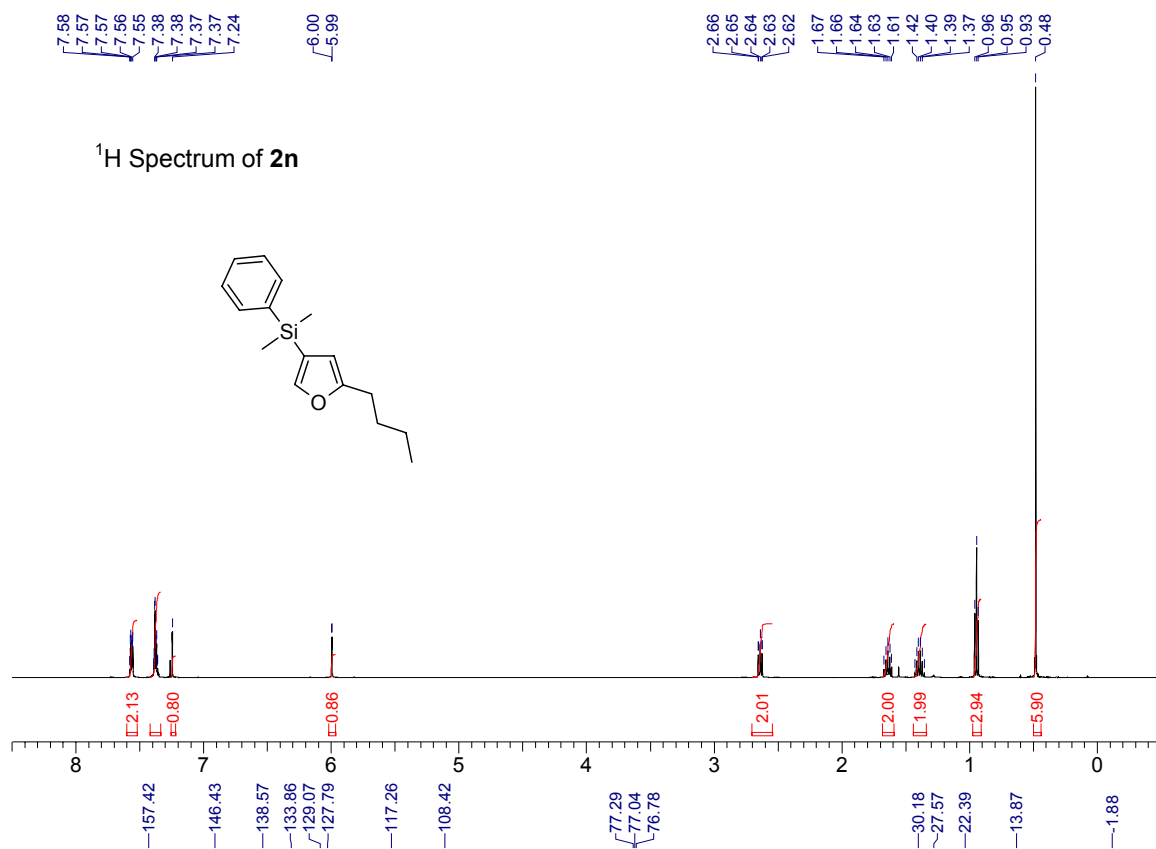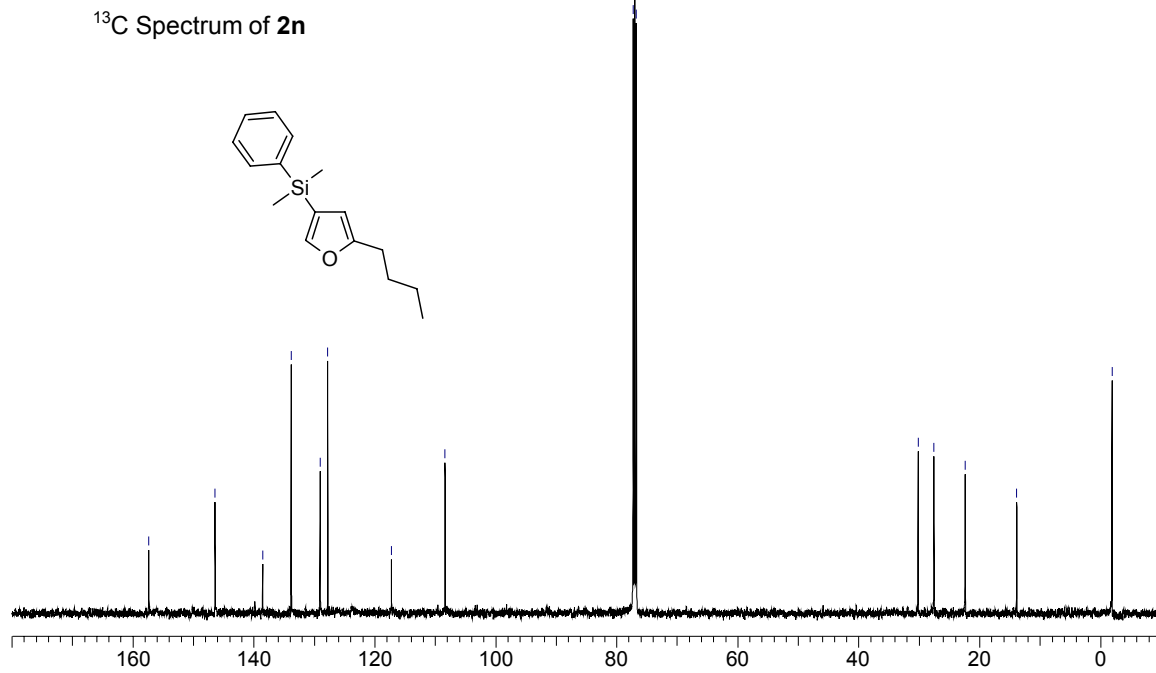

Supplement: NIHMS207351-supplement-1_si_001.pdf [file NIHMS207351-supplement-1_si_001.pdf]
